# Supplementary material
Source: PubMed Central journal article supplement (PMC9612849)

# THE LANCET

## Supplementary appendix

This appendix formed part of the original submission and has been peer reviewed.  
We post it as supplied by the authors.

Supplement to: Frenk J, Chen LC, Chandran L, et al. Challenges and opportunities for educating health professionals after the COVID-19 pandemic. *Lancet* 2022; **400**: 1539-56.

## WEB ANNEX

### Table of Contents

|                                                                                                                                        |           |
|----------------------------------------------------------------------------------------------------------------------------------------|-----------|
| <b>Annex 1: Estimation of Country-Level Medical Education Costs and Health Worker Production .....</b>                                 | <b>2</b>  |
| Estimating Cost per Graduate .....                                                                                                     | 2         |
| Estimating Number of Graduates.....                                                                                                    | 9         |
| Estimating Overall Expenditures .....                                                                                                  | 16        |
| References.....                                                                                                                        | 26        |
| <b>Annex 2: Citation Analysis and Literature Review .....</b>                                                                          | <b>29</b> |
| Methodology: Literature Review of Publication Citing the 2010 Lancet Commission Report .....                                           | 29        |
| Methodology: Literature Review of the Most Prominent Themes Beyond the 2010 Lancet Commission Report.....                              | 32        |
| References.....                                                                                                                        | 35        |
| <b>Annex 3: Examples from Literature Review Prior to COVID-19.....</b>                                                                 | <b>44</b> |
| <b>Annex 4: The Impact of COVID-19 on IT-Facilitated Learning Across Health Professions Education Worldwide (2020) Survey .....</b>    | <b>47</b> |
| Objective .....                                                                                                                        | 47        |
| Methodology .....                                                                                                                      | 47        |
| References.....                                                                                                                        | 51        |
| <b>Annex 5: A Comprehensive List of Literature Review About the Effects of COVID-19 Pandemic on Health Education and Practice.....</b> | <b>52</b> |
| <b>Annex 6: Supplementary Figures .....</b>                                                                                            | <b>59</b> |

## Annex 1: Estimation of Country-Level Medical Education Costs and Health Worker Production

Prepared By: University of Miami Research Team and  
Health Finance & Access Initiative (Eric Keuffel, PhD)

In order to estimate country-level expenditures on medical education, we adopted a “micro-level” approach in which we multiply the estimated cost per graduate by worker group (w) in 2018 (t) for each country (c) by and an estimate of the number of graduates for each cadre in 2018 for each country (Eq. 1). The global (or regional) annual costs represent the sum of expenditures across relevant countries. We also can estimate global (or regional) production of health workers. The basic formulas are indexed by worker type (w, physician, or nurse/midwife), country (c) and time (t, 2018):

$$\text{Eq. 1 } Expenditure_{w,c,t} = Cost\ per\ Graduate_{w,c,t} * Graduates_{w,c,t}$$

$$\text{Eq. 2 } Global\ Expenditure_{w,t} = \sum_c Expenditure_{w,c,t}$$

$$\text{Eq. 3 } Global\ Production_{w,t} = \sum_c Graduates_{w,c,t}$$

### Estimating Cost per Graduate

We estimated cost per graduate either A) directly from literature (n=56 estimates across 47 countries) or B) indirectly via predictive regression analysis.

### Direct Cost per Physician Graduate Estimates

There are 3 main types of sources used for direct estimates.

- 1) Economic Assessments (highest quality; n=15)
- 2) Tuition / Budget Based Estimates (high quality—but generally require assumptions about ratio of tuition revenue to costs, in some cases based on financials in public institutions or private medical schools; n=37)
- 3) Expert Opinion (high quality; n=4)

Table 1 summarizes the estimate values. In each case we A) update the estimate to adjust for country inflation between the year of the study and 2018 based on World Bank CPI data, B) convert to \$US (2018) based on World Bank Exchange Rate, C) adjust units required for graduation (e.g. if estimates are reported in cost per year, we multiply by the relevant number of years for graduation of the medical student) and D) in select cases, make minor adjust for missing capital costs.

**Table 1.A: Cost per Graduate Estimates (n=15), Economic Studies**

| Country        | Estimated Cost per Graduate (\$US, 2018) | GDP/Capita (\$US, 2018) | Source(s) |
|----------------|------------------------------------------|-------------------------|-----------|
| Australia      | \$319,146                                | \$57,396                | 1,2       |
| Brazil         | \$86,514                                 | \$9,001                 | 3         |
| Canada         | \$232,557                                | \$46,313                | 4         |
| Columbia       | \$62,669                                 | \$6,719                 | 5         |
| Ghana          | \$45,738                                 | \$2,202                 | 6-8       |
| Iran           | \$59,170                                 | \$5,520                 | 9         |
| Ireland        | \$177,604                                | \$78,621                | 10        |
| Thailand       | \$93,910                                 | \$7,295                 | 11        |
| United Kingdom | \$252,148                                | \$43,043                | 12        |
| United States  | \$528,309                                | \$62,840                | 13        |
| United States  | \$516,523                                | \$62,840                | 14        |
| United States  | \$588,287                                | \$62,840                | 15        |
| United States  | \$461,349                                | \$62,840                | 16        |
| United States  | \$378,152                                | \$62,840                | 17        |

**Table 1.B: Cost per Graduate Estimates (n=37), Budget/Tuition Estimates**

| Country                     | Estimated Cost per Graduate (US\$, 2018) | GDP/Capita (US\$, 2018) | Source(s)                                                           | Comment                                                                                                                                                                                                                                                                                                                                           |
|-----------------------------|------------------------------------------|-------------------------|---------------------------------------------------------------------|---------------------------------------------------------------------------------------------------------------------------------------------------------------------------------------------------------------------------------------------------------------------------------------------------------------------------------------------------|
| Antigua                     | \$145,784                                | \$16,727                | American University of Antigua <sup>18</sup>                        | Assumes listed international price reflects reasonable proxy for cost                                                                                                                                                                                                                                                                             |
| Aruba                       | \$55,319                                 | \$29,008                | Aureus University School of Medicine <sup>19</sup>                  | Assumes listed international price reflects reasonable proxy for cost                                                                                                                                                                                                                                                                             |
| Australia                   | \$328,667                                | \$57,396                | Monash University School of Medicine <sup>20</sup>                  | Assumes international listed price divided by ratio of 'tuition income / total operating expenditure (less depreciation)' from income statement is a reasonable proxy for cost (2015 International Tuition MD per year = 56,300 SGD) / (388,131/642,906)                                                                                          |
| Bangladesh                  | \$30,041                                 | \$1,698                 | <sup>21</sup>                                                       | Assumes that regulators 'cap' on private tuition is a reasonable estimate of total cost                                                                                                                                                                                                                                                           |
| Barbados                    | \$68,681                                 | \$17,745                | American University of Barbados <sup>18</sup>                       | Assumes listed international price reflects reasonable proxy for cost                                                                                                                                                                                                                                                                             |
| Belize                      | \$76,565                                 | \$4,885                 | American Global University School of Medicine <sup>22</sup>         | Assumes listed international price reflects reasonable proxy for cost                                                                                                                                                                                                                                                                             |
| China, People's Republic of | \$41,209                                 | \$9,977                 | China Medical University <sup>23</sup>                              | Assumes listed international price reflects reasonable proxy for cost                                                                                                                                                                                                                                                                             |
| Cyprus                      | \$127,839                                | \$28,690                | University of Nicosia Medical School <sup>24</sup>                  | Assumes listed international price reflects reasonable proxy for cost                                                                                                                                                                                                                                                                             |
| Czech Republic              | \$134,989                                | \$23,047                | Charles University <sup>25</sup>                                    | Assumes listed price reflects reasonable proxy for cost - recently formed private (1979) university                                                                                                                                                                                                                                               |
| Dominica                    | \$49,636                                 | \$7,691                 | All Saints University of Medicine <sup>26</sup>                     | Assumes listed international price reflects reasonable proxy for cost                                                                                                                                                                                                                                                                             |
| Ethiopia                    | \$14,473                                 | \$772                   | St. Pauls Hospital Millenium Medical College <sup>27</sup>          | Assumes listed international price reflects reasonable proxy for cost                                                                                                                                                                                                                                                                             |
| Ethiopia                    | \$39,036                                 | \$772                   | Mills et al., 2011 <sup>28</sup>                                    | Assumes Mills et al. estimate is reflective of cost                                                                                                                                                                                                                                                                                               |
| Germany                     | \$286,190                                | \$47,639                | Tuebingen University <sup>29</sup>                                  | Assumes medical school budget / # students reflects annual cost per student                                                                                                                                                                                                                                                                       |
| Grenadines                  | \$51,281                                 | \$7,361                 | American University of St. Vincent School of Medicine <sup>18</sup> | Assumes listed international price reflects reasonable proxy for cost                                                                                                                                                                                                                                                                             |
| Guyana                      | \$64,105                                 | \$4,979                 | American International School of Medicine <sup>30</sup>             | Assumes listed international price reflects reasonable proxy for cost                                                                                                                                                                                                                                                                             |
| India                       | \$69,839                                 | \$2,006                 | Joy et al., IHEA 2007 Presentation <sup>31</sup>                    | Assumes private sector tuition approximates cost                                                                                                                                                                                                                                                                                                  |
| Jamaica                     | \$74,833                                 | \$5,354                 | All American Institute of Medical Sciences <sup>32</sup>            | Assumes listed international price reflects reasonable proxy for cost                                                                                                                                                                                                                                                                             |
| Jordan                      | \$141,877                                | \$4,242                 | University of Jordan <sup>33</sup>                                  | Assumes listed international price reflects reasonable proxy for cost                                                                                                                                                                                                                                                                             |
| Kenya                       | \$86,974                                 | \$1,708                 | University of Nairobi, Tuition Price List, 2015 <sup>34,35</sup>    | Assumes 50/50 split in merit vs non-merit students and 'academic departments' costs are attributed 50% to tuition (lower level for other cost components)                                                                                                                                                                                         |
| Kenya                       | \$44,727                                 | \$1,708                 | Mills et al., 2011 <sup>28</sup>                                    | Assumes Mills et al. estimate is reflective of cost                                                                                                                                                                                                                                                                                               |
| Laos                        | \$17,076                                 | \$2,542                 | WHO, FAIMER <sup>36,37</sup>                                        | Assumes that the weighted average of cost per year is \$1500 and Nurses cost per year is \$1200, given the ratio physicians to health worker ratio in Laos (2016) was .18 (2,107/11,561), the estimated cost per MD is \$2846 per year                                                                                                            |
| Lebanon                     | \$214,630                                | \$8,025                 | American University in Beirut <sup>38</sup>                         | Assumes price divided by ratio of 'tuition income net of financial aid' / 'total education service expense' from income statement is a reasonable proxy for cost (2015 Tuition MD per graduate = \$36,382 US\$) / (134,879,943/17,924,000); tuition figure is MD specific; tuition income and education service expense is university wide ratio. |
| Malawi                      | \$25,030                                 | \$381                   | Mills et al., 2011 <sup>28</sup>                                    | Assumes Mills et al. estimate is reflective of cost                                                                                                                                                                                                                                                                                               |

|              |           |          |                                                         |                                                                                                                                                                                                                                                          |
|--------------|-----------|----------|---------------------------------------------------------|----------------------------------------------------------------------------------------------------------------------------------------------------------------------------------------------------------------------------------------------------------|
| Malaysia     | \$89,332  | \$11,373 | MAHSA University School of Medicine <sup>39</sup>       | Assumes listed price reflects reasonable proxy for cost                                                                                                                                                                                                  |
| New Zealand  | \$300,164 | \$42,950 | University of Auckland <sup>40</sup>                    | Assumes international listed price divided by ratio of 'tuition income / total operating expenditure (less depreciation)' from income statement is a reasonable proxy for cost (2015 International Tuition MD per year = 56,300 SGD) / (388,131/642,906) |
| Nigeria      | \$40,083  | \$2,033  | Lagos State University <sup>41</sup>                    |                                                                                                                                                                                                                                                          |
| Nigeria      | \$27,432  | \$2,033  | Mills et al., 2011 <sup>28</sup>                        | Assumes Mills et al. estimate is reflective of cost                                                                                                                                                                                                      |
| Philippines  | \$73,688  | \$3,252  | Fatima University SOM <sup>42</sup>                     | Assumes listed price reflects reasonable proxy for cost - recently formed private (1979) university                                                                                                                                                      |
| Poland       | \$89,604  | \$15,461 | Poznan University <sup>43</sup>                         | Assumes listed price reflects reasonable proxy for cost - well established school with international program (mark-up above cost?)                                                                                                                       |
| Saint Lucia  | \$62,675  | \$11,358 | Atlantic University School of Medicine <sup>30</sup>    | Assumes listed international price reflects reasonable proxy for cost                                                                                                                                                                                    |
| Singapore    | \$509,388 | \$66,189 | NUS-Duke University <sup>44,45</sup>                    | Assumes international listed price divided by ratio of 'tuition income / total operating expenditure (less depreciation)' from income statement is a reasonable proxy for cost (2015 International Tuition MD per year = 56,300 SGD) / (388,131/642,906) |
| South Africa | \$32,203  | \$6,374  | Mills et al., 2011 <sup>28</sup>                        | Assumes Mills et al. estimate is reflective of cost                                                                                                                                                                                                      |
| Sweden       | \$165,249 | \$54,589 | Karolinska Institutet, Annual Report 2014 <sup>46</sup> | Share of Bachelors and Masters students in Medicine (FTE) = 2,135/5,336 (p.17), Costs for Bachelors and Masters Program 818.8 M SEK (2008) p.22, Medical Degrees conferred 249 (p. 100)-->1.32 SEK per graduate                                          |
| Tanzania     | \$26,321  | \$1,061  | Hubert Kairuki Memorial University <sup>47</sup>        | Assumes listed price reflects reasonable proxy for cost - recently formed private university                                                                                                                                                             |
| Tanzania     | \$26,002  | \$1,061  | Mills et al., 2011 <sup>28</sup>                        | Assumes Mills et al. estimate is reflective of cost                                                                                                                                                                                                      |
| Uganda       | \$18,753  | \$767    | Mills et al., 2011 <sup>28</sup>                        | Assumes Mills et al. estimate is reflective of cost                                                                                                                                                                                                      |
| Zambia       | \$17,924  | \$1,556  | Mills et al., 2011 <sup>28</sup>                        | Assumes Mills et al. estimate is reflective of cost                                                                                                                                                                                                      |

**Table 1.C: Cost per Graduate Estimates (n=4), Expert Assessment**

| Country        | Estimated Cost per Graduate (\$US, 2018) | GDP/Capita (\$US, 2018) | Source(s)                     |
|----------------|------------------------------------------|-------------------------|-------------------------------|
| Czech Republic | \$84,810                                 | \$23,047                | Martin Potucek <sup>48</sup>  |
| Germany        | \$221,733                                | \$47,639                | Thomas Reinhold <sup>49</sup> |
| Norway         | \$152,949                                | \$81,734                | Tor Iverson <sup>50</sup>     |
| Slovakia       | \$43,026                                 | \$19,428                | Martin Potucek <sup>48</sup>  |

Cost per graduate for each country was estimated in \$US 2018 dollars (exchange rate estimate). In instances where direct evidence on the cost per graduate exists in available literature, those values were used for the country level estimation (in most models). In cases where there is more than one direct estimate for a country, the average is used.

We have increased the number of direct estimates relative to prior efforts as indicated in Table 2.

**Table 2: Cost per Physician Estimates across Studies**

|                                               |                        | 2010 Commission (2008) | 2015 WHO (2013) | 2021 Commission (2018) |
|-----------------------------------------------|------------------------|------------------------|-----------------|------------------------|
| Cost per MD Graduate Estimates for Regression | Economic Studies       | 9                      | 10              | 15                     |
|                                               | Financial Analysis*    | 0                      | 39              | 37                     |
|                                               | Expert Estimate        | 1                      | 4               | 4                      |
|                                               | <b>Total Studies</b>   | 10                     | 53              | 56                     |
|                                               | <b>Total Countries</b> | 7                      | 43              | 47                     |

\*Budget or Tuition Based Estimates

### Indirect ‘Cost per Physician Graduate’ Estimates

For those countries without a direct estimate of ‘cost per physician graduate’, we rely on regression models to estimate the expected cost. Specifically, we use Generalized Linear Models (GLM), a commonly used approach in health economics<sup>51</sup>, and use various covariates depending on the model.

Potential covariates include:

- GNI/Capita (\$US, 2018)
- Income Band (4 Categories: High Income, Upper Middle Income, Lower Middle Income, Low Income, based on World Bank 2018 designation)
- Region (Regression Regions: Africa, Asia/Middle East, Europe, Latin America Caribbean, North America, Oceania)

In the GLM framework, we use a ‘log’ link function and either a ‘poisson’ or ‘gamma’ distribution depending on specific model -- the diagnostic recommendation as suggested in Deb et al (2017). Based on regression results, we estimate predictions of ‘cost per physician graduate’ (overall and for each region) based on the GNI/capita of the country. The results are reflected in Table 3 and Figure 1.

**Table 3: Predicted Cost per Physician Graduate based on GNI/Capita, (by region)**

|                                    |     | Cost Per Physician Graduate (by Region and Income Level) |           |             |           |           |              |           |
|------------------------------------|-----|----------------------------------------------------------|-----------|-------------|-----------|-----------|--------------|-----------|
|                                    |     | 1<br>Africa                                              | 2<br>Asia | 3<br>Europe | 4<br>LAC  | 5<br>NA   | 6<br>Oceania | Overall   |
| GNI / Capita<br>(\$US 1000s, 2018) | \$1 | \$38,398                                                 | \$117,803 | \$90,483    | \$85,657  | \$178,721 | \$161,444    | \$56,550  |
|                                    | 2   | \$39,259                                                 | \$120,442 | \$92,511    | \$87,576  | \$182,725 | \$165,062    | \$58,219  |
|                                    | 3   | \$40,138                                                 | \$123,141 | \$94,583    | \$89,538  | \$186,819 | \$168,760    | \$59,937  |
|                                    | 4   | \$41,038                                                 | \$125,900 | \$96,702    | \$91,544  | \$191,005 | \$172,541    | \$61,706  |
|                                    | 5   | \$41,957                                                 | \$128,720 | \$98,869    | \$93,595  | \$195,284 | \$176,407    | \$63,527  |
|                                    | 6   | \$42,897                                                 | \$131,605 | \$101,084   | \$95,692  | \$199,660 | \$180,359    | \$65,401  |
|                                    | 7   | \$43,858                                                 | \$134,553 | \$103,349   | \$97,836  | \$204,133 | \$184,400    | \$67,331  |
|                                    | 8   | \$44,841                                                 | \$137,568 | \$105,665   | \$100,028 | \$208,707 | \$188,532    | \$69,318  |
|                                    | 9   | \$45,846                                                 | \$140,650 | \$108,032   | \$102,269 | \$213,383 | \$192,756    | \$71,364  |
|                                    | 10  | \$46,873                                                 | \$143,801 | \$110,453   | \$104,561 | \$218,164 | \$197,075    | \$73,470  |
|                                    | 11  | \$47,923                                                 | \$147,023 | \$112,927   | \$106,904 | \$223,052 | \$201,490    | \$75,638  |
|                                    | 12  | \$48,997                                                 | \$150,317 | \$115,458   | \$109,299 | \$228,049 | \$206,005    | \$77,871  |
|                                    | 13  | \$50,094                                                 | \$153,685 | \$118,044   | \$111,748 | \$233,159 | \$210,620    | \$80,169  |
|                                    | 14  | \$51,217                                                 | \$157,129 | \$120,689   | \$114,251 | \$238,383 | \$215,339    | \$82,535  |
|                                    | 15  | \$52,364                                                 | \$160,649 | \$123,393   | \$116,811 | \$243,724 | \$220,164    | \$84,970  |
|                                    | 16  | \$53,538                                                 | \$164,249 | \$126,158   | \$119,428 | \$249,185 | \$225,097    | \$87,478  |
|                                    | 17  | \$54,737                                                 | \$167,929 | \$128,985   | \$122,104 | \$254,768 | \$230,140    | \$90,059  |
|                                    | 18  | \$55,963                                                 | \$171,691 | \$131,875   | \$124,840 | \$260,476 | \$235,296    | \$92,717  |
|                                    | 19  | \$57,217                                                 | \$175,538 | \$134,829   | \$127,637 | \$266,312 | \$240,568    | \$95,453  |
|                                    | 20  | \$58,499                                                 | \$179,471 | \$137,850   | \$130,497 | \$272,279 | \$245,958    | \$98,270  |
|                                    | 21  | \$59,810                                                 | \$183,492 | \$140,939   | \$133,421 | \$278,379 | \$251,469    | \$101,171 |
|                                    | 22  | \$61,150                                                 | \$187,603 | \$144,096   | \$136,410 | \$284,616 | \$257,103    | \$104,156 |
|                                    | 23  | \$62,520                                                 | \$191,806 | \$147,325   | \$139,466 | \$290,993 | \$262,864    | \$107,230 |
|                                    | 24  | \$63,921                                                 | \$196,104 | \$150,626   | \$142,591 | \$297,513 | \$268,753    | \$110,395 |
|                                    | 25  | \$65,353                                                 | \$200,498 | \$154,001   | \$145,786 | \$304,179 | \$274,775    | \$113,652 |
|                                    | 26  | \$66,817                                                 | \$204,990 | \$157,451   | \$149,052 | \$310,994 | \$280,931    | \$117,006 |
|                                    | 27  | \$68,314                                                 | \$209,583 | \$160,979   | \$152,392 | \$317,962 | \$287,226    | \$120,460 |
|                                    | 28  | \$69,845                                                 | \$214,278 | \$164,586   | \$155,806 | \$325,086 | \$293,661    | \$124,014 |
|                                    | 29  | \$71,410                                                 | \$219,079 | \$168,273   | \$159,297 | \$332,370 | \$300,241    | \$127,674 |
|                                    | 30  | \$73,010                                                 | \$223,988 | \$172,043   | \$162,866 | \$339,816 | \$306,967    | \$131,442 |
|                                    | 31  | \$74,646                                                 | \$229,006 | \$175,898   | \$166,515 | \$347,430 | \$313,845    | \$135,321 |
|                                    | 32  | \$76,318                                                 | \$234,137 | \$179,839   | \$170,246 | \$355,214 | \$320,877    | \$139,315 |
|                                    | 33  | \$78,028                                                 | \$239,383 | \$183,868   | \$174,060 | \$363,173 | \$328,066    | \$143,426 |
|                                    | 34  | \$79,776                                                 | \$244,747 | \$187,988   | \$177,960 | \$371,310 | \$335,417    | \$147,659 |
|                                    | 35  | \$81,564                                                 | \$250,230 | \$192,200   | \$181,948 | \$379,629 | \$342,932    | \$152,016 |
|                                    | 36  | \$83,391                                                 | \$255,837 | \$196,506   | \$186,024 | \$388,135 | \$350,615    | \$156,503 |
|                                    | 37  | \$85,260                                                 | \$261,569 | \$200,909   | \$190,192 | \$396,831 | \$358,471    | \$161,121 |
|                                    | 38  | \$87,170                                                 | \$267,430 | \$205,410   | \$194,453 | \$405,722 | \$366,503    | \$165,876 |
|                                    | 39  | \$89,123                                                 | \$273,421 | \$210,013   | \$198,810 | \$414,813 | \$374,714    | \$170,771 |
|                                    | 40  | \$91,120                                                 | \$279,547 | \$214,718   | \$203,265 | \$424,107 | \$383,110    | \$175,811 |
|                                    | 41  | \$93,161                                                 | \$285,811 | \$219,529   | \$207,819 | \$433,609 | \$391,693    | \$181,000 |
|                                    | 42  | \$95,249                                                 | \$292,214 | \$224,448   | \$212,475 | \$443,324 | \$400,469    | \$186,341 |

|    |           |           |           |           |           |           |           |
|----|-----------|-----------|-----------|-----------|-----------|-----------|-----------|
| 43 | \$97,383  | \$298,762 | \$229,476 | \$217,236 | \$453,257 | \$409,442 | \$191,840 |
| 44 | \$99,565  | \$305,455 | \$234,618 | \$222,103 | \$463,412 | \$418,616 | \$197,502 |
| 45 | \$101,795 | \$312,299 | \$239,874 | \$227,079 | \$473,795 | \$427,995 | \$203,330 |
| 46 | \$104,076 | \$319,296 | \$245,249 | \$232,167 | \$484,411 | \$437,584 | \$209,331 |
| 47 | \$106,408 | \$326,450 | \$250,744 | \$237,369 | \$495,264 | \$447,388 | \$215,509 |
| 48 | \$108,792 | \$333,764 | \$256,362 | \$242,687 | \$506,361 | \$457,412 | \$221,869 |
| 49 | \$111,230 | \$341,243 | \$262,106 | \$248,124 | \$517,706 | \$467,661 | \$228,416 |
| 50 | \$113,722 | \$348,888 | \$267,978 | \$253,684 | \$529,305 | \$478,139 | \$235,157 |
| 51 | \$116,270 | \$356,705 | \$273,982 | \$259,367 | \$541,164 | \$488,852 | \$242,097 |
| 52 | \$118,875 | \$364,697 | \$280,121 | \$265,179 | \$553,289 | \$499,805 | \$249,242 |
| 53 | \$121,538 | \$372,868 | \$286,397 | \$271,120 | \$565,686 | \$511,003 | \$256,597 |
| 54 | \$124,261 | \$381,223 | \$292,814 | \$277,195 | \$578,360 | \$522,452 | \$264,170 |
| 55 | \$127,045 | \$389,764 | \$299,375 | \$283,405 | \$591,318 | \$534,158 | \$271,966 |
| 56 | \$129,892 | \$398,497 | \$306,082 | \$289,755 | \$604,567 | \$546,126 | \$279,992 |
| 57 | \$132,802 | \$407,425 | \$312,940 | \$296,247 | \$618,113 | \$558,362 | \$288,255 |
| 58 | \$135,778 | \$416,554 | \$319,951 | \$302,884 | \$631,962 | \$570,872 | \$296,761 |
| 59 | \$138,820 | \$425,887 | \$327,120 | \$309,671 | \$646,121 | \$583,662 | \$305,519 |
| 60 | \$141,930 | \$435,429 | \$334,449 | \$316,609 | \$660,597 | \$596,740 | \$314,536 |
| 61 | \$145,110 | \$445,185 | \$341,943 | \$323,703 | \$675,398 | \$610,110 | \$323,818 |
| 62 | \$148,361 | \$455,159 | \$349,604 | \$330,955 | \$690,531 | \$623,779 | \$333,374 |
| 63 | \$151,685 | \$465,357 | \$357,437 | \$338,370 | \$706,002 | \$637,755 | \$343,213 |
| 64 | \$155,084 | \$475,784 | \$365,445 | \$345,952 | \$721,820 | \$652,044 | \$353,341 |
| 65 | \$158,558 | \$486,444 | \$373,633 | \$353,703 | \$737,993 | \$666,654 | \$363,769 |
| 66 | \$162,111 | \$497,343 | \$382,005 | \$361,628 | \$754,528 | \$681,590 | \$374,504 |
| 67 | \$165,743 | \$508,486 | \$390,564 | \$369,730 | \$771,433 | \$696,861 | \$385,556 |
| 68 | \$169,457 | \$519,878 | \$399,314 | \$378,014 | \$788,718 | \$712,475 | \$396,935 |
| 69 | \$173,253 | \$531,526 | \$408,261 | \$386,483 | \$806,389 | \$728,438 | \$408,649 |
| 70 | \$177,135 | \$543,435 | \$417,408 | \$395,143 | \$824,456 | \$744,759 | \$420,709 |



**Figure 1: Predicted Cost per Physician Graduate based on GNI/Capita, (by region)**

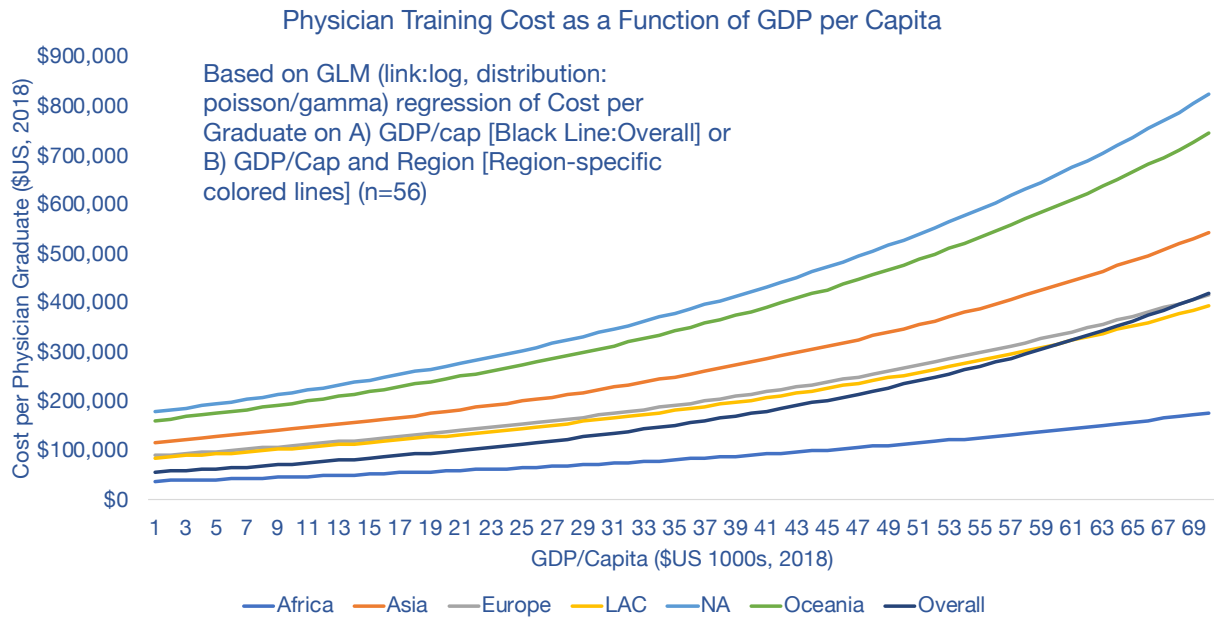

We also run a regression in which only the 15 observations from the economic studies are used and compare it to the regression results that rely on all 56 observations. The results suggest somewhat larger estimates from the economic studies, but the results appear comparable.

**Figure 2: Comparison of Regression Predictions using all observations (n=56) vs. economic study observations (n=15)**

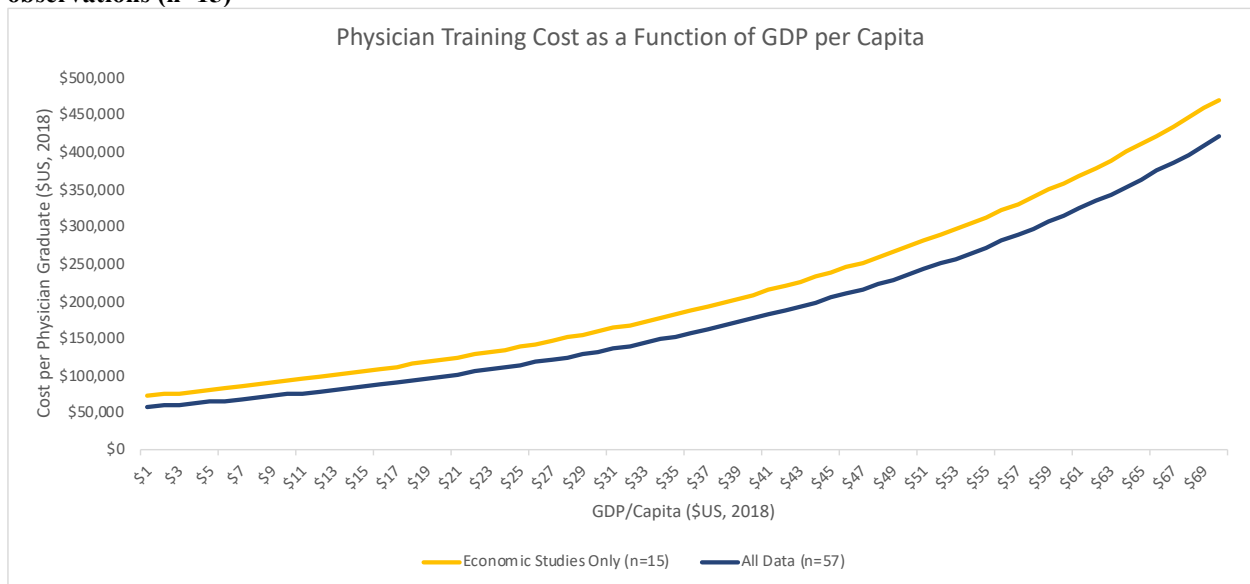

Table 4 summarizes the prediction by income band and region after running the GLM regression using region and income band covariates.

**Table 4: Expected Cost per Physician by Income Band and Region**

| Income Band | Region      |              |             |           |           |              |
|-------------|-------------|--------------|-------------|-----------|-----------|--------------|
|             | 1<br>Africa | 2<br>Asia/ME | 3<br>Europe | 4<br>LAC  | 5<br>NA   | 6<br>Oceania |
| 1           | \$24,323    | \$39,832     | \$29,074    | \$24,166  | \$70,730  | \$55,552     |
| 2           | \$36,177    | \$59,244     | \$43,243    | \$35,944  | \$105,200 | \$82,626     |
| 3           | \$76,690    | \$125,588    | \$91,668    | \$76,195  | \$223,008 | \$175,154    |
| 4           | \$168,079   | \$275,249    | \$200,907   | \$166,995 | \$488,761 | \$383,880    |

### ‘Cost per Nurse/Midwife Graduate’ Estimates

Given that the economic costing literature on nursing and midwives initially appears to be significantly less developed, we estimate cost per nursing graduate as a fixed fraction of physician ‘cost per graduate’ for each country. Based on prior work at the World Bank, we set this ratio at 0.2 (Duration of the nursing degree is assumed 50% as long and intensity of resource use is 40%-->.4\*.5=.2).<sup>52,1</sup>

### Estimating Number of Graduates

#### ‘Direct’ Annual Graduate Estimates

For OECD countries, the graduate numbers were available and obtained from WHO Health Workforce Portal<sup>53</sup> which were cross-referenced with the OECD database<sup>54</sup>. The data aligned in most cases, with minor differences in which case WHO data was used over OECD for uniformity. Estimates that are prior to 2018 are updated to 2018 on the basis of population growth rate of the country between the time of the estimate and 2018 (Eq. 4). (This approach assumes graduates grow in proportion to population over time and differs from the 2010 approach,<sup>55</sup> which assumed no growth between the report year and 2008). Populations were sourced from the World Bank. Table 5 shows how the share of ‘direct’ estimates has increased over time.

$$Eq\ 4. \text{ Graduates}_{c,2018} = \text{Graduates}_{c,t} * \frac{\text{Population}_{c,2018}}{\text{Population}_{c,t}}$$

**Table 5: Share of Graduate Estimates from Direct Estimates across Studies**

| Graduate Estimates | Percent if Countries Directly Reporting Graduates | 2010 Commission (2008) |           | 2015 WHO (2013) |           | 2021 Commission (2018) |           |
|--------------------|---------------------------------------------------|------------------------|-----------|-----------------|-----------|------------------------|-----------|
|                    |                                                   | Doctors                | Nurse/MWs | Doctors         | Nurse/MWs | Doctors                | Nurse/MWs |
|                    |                                                   | 17.5%                  | 20.3%     | 33.8%           | 26.5%     | 25.0%                  | 60.0%     |

The sum of ‘Nurses’ and ‘Midwives’ is used to estimate the total nurse/midwife category. Graduates are defined as number of students who have graduated from a given health workforce education and training programmes in professional schools or similar institutions in a given year. Overall, as indicated in Table 5, this study has a higher percentage of ‘direct’ estimates relative to prior efforts-with 35% of countries reporting an annual doctor graduate total and 60% of countries providing a nurse/midwife graduate total.

<sup>1</sup> In order to estimate scale up costs in Sub-Saharan Africa for medical education, a World Bank analysis estimated that the annual costs of an enrollee in a physician undergraduate education program are five times the annual costs of an average tertiary education student in each country. Nursing student costs are estimated at twice that of an average tertiary enrollee. Hence on a per year basis, the costs of a physician-in-training are 2.5 times that of a nursing candidate (Intensity Ratio). Assuming an average duration of enrollment is 3 years for nursing and 6 years for medicine, the duration of training is 2 times as long for a physician as a nurse (Duration Ratio). Multiplying the intensity ratio and duration ratios together, the estimated cost for a physician graduate is estimated at 5 times that of a nurse. Hence, in the base case we multiply the estimated costs for a physician graduate in each country by 0.2 to estimate cost per nursing graduate. We also apply this cost to midwives as nursing and midwife stock and production estimates are typically jointly estimated.

In select cases when no estimate exists in either OECD or WHO dataset, other resources are referenced. Table 6.A and 6.B summarize the estimates and sources for physicians and nurses/midwives direct graduate estimates.

**Table 6.A: Direct Physician Graduate Estimates**

| Source: Physician Graduate Data | Country                | Est. Number of MD Grads (2018): Population Adjustment |
|---------------------------------|------------------------|-------------------------------------------------------|
| OECD <sup>54</sup>              | Australia              | 3,958                                                 |
|                                 | Austria                | 1,346                                                 |
|                                 | Canada                 | 2,860                                                 |
|                                 | Czechia                | 1,700                                                 |
|                                 | Denmark                | 1,335                                                 |
|                                 | Germany                | 9,563                                                 |
|                                 | Greece                 | 1,331                                                 |
|                                 | Hungary                | 1,560                                                 |
|                                 | Iceland                | 48                                                    |
|                                 | Ireland                | 1,224                                                 |
|                                 | Israel                 | 658                                                   |
|                                 | Italy                  | 9,103                                                 |
|                                 | Korea (Rep.)           | 3,860                                                 |
|                                 | Latvia                 | 3,860                                                 |
|                                 | Lithuania              | 577                                                   |
|                                 | Netherlands            | 2,717                                                 |
|                                 | Norway                 | 542                                                   |
|                                 | Portugal               | 1,760                                                 |
|                                 | Slovakia               | 962                                                   |
|                                 | Slovenia               | 281                                                   |
|                                 | Switzerland            | 995                                                   |
| Turkey                          | 9,395                  |                                                       |
| United States                   | 25,979                 |                                                       |
| OECD/WHO <sup>53,54</sup>       | Belgium                | 3,282                                                 |
|                                 | Finland                | 645                                                   |
|                                 | France                 | 7,263                                                 |
|                                 | Mexico                 | 16,586                                                |
|                                 | Poland                 | 4,006                                                 |
|                                 | Spain                  | 6,664                                                 |
|                                 | Sweden                 | 1,334                                                 |
|                                 | United Kingdom         | 8,570                                                 |
| WHO <sup>53</sup>               | Bosnia and Herzegovina | 328                                                   |
|                                 | Russian Federation     | 15,454                                                |
|                                 | Andorra                | 2                                                     |

|                                                                                    |                           |         |
|------------------------------------------------------------------------------------|---------------------------|---------|
|                                                                                    | North Macedonia           | 262     |
|                                                                                    | Albania                   | 258     |
|                                                                                    | Romania                   | 3,527   |
|                                                                                    | Azerbaijan                | 1,189   |
|                                                                                    | Kazakhstan                | 3,444   |
|                                                                                    | Kyrgyzstan                | 1,828   |
|                                                                                    | Tajikistan                | 0       |
|                                                                                    | Turkmenistan              | 284     |
|                                                                                    | Ukraine                   | 3,733   |
|                                                                                    | Uzbekistan                | 3,699   |
|                                                                                    | Armenia                   | 402     |
|                                                                                    | Belarus                   | 2,932   |
|                                                                                    | Croatia                   | 499     |
|                                                                                    | Georgia                   | 420     |
|                                                                                    | Malta                     | 119     |
|                                                                                    | Serbia                    | 1,340   |
|                                                                                    | Bangladesh                | 5,512   |
|                                                                                    | Bhutan                    | 33      |
|                                                                                    | Bulgaria                  | 831     |
|                                                                                    | Costa Rica                | 881     |
|                                                                                    | Libya                     | 1,116   |
|                                                                                    | Mozambique                | 600     |
|                                                                                    | Pakistan                  | 16,332  |
|                                                                                    | Chile                     | 1,637   |
|                                                                                    | Estonia                   | 136     |
|                                                                                    | India                     | 127,846 |
|                                                                                    | Iran, Islamic Republic of | 6,261   |
|                                                                                    | Iraq                      | 2,631   |
|                                                                                    | Japan                     | 8,751   |
|                                                                                    | Moldova                   | 634     |
|                                                                                    | Montenegro                | 30      |
|                                                                                    | Myanmar                   | 205     |
|                                                                                    | New Zealand               | 2,733   |
|                                                                                    | Nigeria                   | 2,836   |
|                                                                                    | Sri Lanka                 | 1,200   |
|                                                                                    | Thailand                  | 2,470   |
|                                                                                    | Timor-Leste               | 59      |
|                                                                                    | Zimbabwe                  | 207     |
| National Center of Health Professions Education<br>Development (PKU) <sup>56</sup> | China                     | 83,204  |

|                                                                                           |       |     |
|-------------------------------------------------------------------------------------------|-------|-----|
| Oxford Business Group, <sup>57</sup> Weill Medical Qatar Annual Report 2018 <sup>58</sup> | Qatar | 418 |
|-------------------------------------------------------------------------------------------|-------|-----|

**Table 6.B: Direct Nurse/Midwife Graduate Estimates**

| Source: Nurse/Midwife Graduate Data | Country        | Est. Number of MD Grads (2018): Population Adjustment |
|-------------------------------------|----------------|-------------------------------------------------------|
| OECD <sup>54</sup>                  | Australia      | 25,274                                                |
|                                     | Austria        | 2,936                                                 |
|                                     | Canada         | 20,951                                                |
|                                     | Czechia        | 1,681                                                 |
|                                     | Denmark        | 2,752                                                 |
|                                     | Germany        | 44,517                                                |
|                                     | Greece         | 9,029                                                 |
|                                     | Hungary        | 6,177                                                 |
|                                     | Iceland        | 208                                                   |
|                                     | Ireland        | 1,533                                                 |
|                                     | Israel         | 2,217                                                 |
|                                     | Italy          | 12,248                                                |
|                                     | Korea, Rep.    | 53,080                                                |
|                                     | Latvia         | 553                                                   |
|                                     | Lithuania      | 644                                                   |
|                                     | Luxembourg     | 76                                                    |
|                                     | Netherlands    | 10,101                                                |
|                                     | Norway         | 4,378                                                 |
|                                     | Portugal       | 2,580                                                 |
|                                     | Slovakia       | 1,517                                                 |
| Slovenia                            | 1,657          |                                                       |
| Switzerland                         | 9,208          |                                                       |
| Turkey                              | 18,446         |                                                       |
| United States                       | 206,420        |                                                       |
| OECD/WHO <sup>53,54</sup>           | Belgium        | 7,994                                                 |
|                                     | Finland        | 4,937                                                 |
|                                     | France         | 27,911                                                |
|                                     | Mexico         | 19,464                                                |
|                                     | Poland         | 5,309                                                 |
|                                     | Spain          | 10,300                                                |
|                                     | Sweden         | 4,362                                                 |
|                                     | United Kingdom | 22,618                                                |
| WHO <sup>53</sup>                   | Afghanistan    | 4,507                                                 |
|                                     | Albania        | 540                                                   |

|  |                           |         |
|--|---------------------------|---------|
|  | Algeria                   | 994     |
|  | Andorra                   | 2       |
|  | Angola                    | 727     |
|  | Antigua and Barbuda       | 20      |
|  | Armenia                   | 525     |
|  | Azerbaijan                | 377     |
|  | Bangladesh                | 6,450   |
|  | Barbados                  | 89      |
|  | Belarus                   | 255     |
|  | Belize                    | 50      |
|  | Bhutan                    | 194     |
|  | Bosnia and Herzegovina    | 432     |
|  | Botswana                  | 392     |
|  | Bulgaria                  | 542     |
|  | Burkina Faso              | 4,899   |
|  | Burundi                   | 49      |
|  | Chile                     | 6,282   |
|  | Congo, Dem. Rep.          | 370     |
|  | Cook Islands              | 6       |
|  | Costa Rica                | 137     |
|  | Croatia                   | 1,088   |
|  | Cyprus                    | 272     |
|  | Dominican Republic        | 1,659   |
|  | El Salvador               | 493     |
|  | Eritrea                   | 575     |
|  | Estonia                   | 424     |
|  | Eswatini (swaziland)      | 298     |
|  | Ethiopia                  | 2,281   |
|  | Fiji                      | 43      |
|  | Gambia, The               | 125     |
|  | Georgia                   | 16      |
|  | Ghana                     | 13,078  |
|  | Guatemala                 | 1,177   |
|  | Guyana                    | 225     |
|  | India                     | 322,827 |
|  | Iran, Islamic Republic of | 11,673  |
|  | Iraq                      | 44,391  |
|  | Jamaica                   | 418     |
|  | Japan                     | 59,486  |

|  |                                  |        |
|--|----------------------------------|--------|
|  | Jordan                           | 153    |
|  | Kazakhstan                       | 12,913 |
|  | Kenya                            | 7,432  |
|  | Kiribati                         | 15     |
|  | Korea, Dem. People's Rep.        | 20,020 |
|  | Lao People's Democratic Republic | 169    |
|  | Lebanon                          | 2,037  |
|  | Lesotho                          | 304    |
|  | Libya                            | 267    |
|  | Madagascar                       | 163    |
|  | Malawi                           | 2,173  |
|  | Malaysia                         | 5,367  |
|  | Maldives                         | 134    |
|  | Malta                            | 184    |
|  | Moldova                          | 810    |
|  | Monaco                           | 30     |
|  | Montenegro                       | 55     |
|  | Morocco                          | 492    |
|  | Mozambique                       | 1,536  |
|  | Myanmar                          | 3,797  |
|  | Namibia                          | 274    |
|  | New Zealand                      | 2,081  |
|  | North Macedonia                  | 218    |
|  | Oman                             | 95     |
|  | Papua New Guinea                 | 484    |
|  | Paraguay                         | 1,046  |
|  | Romania                          | 3,696  |
|  | Russian Federation               | 2,333  |
|  | Rwanda                           | 1,109  |
|  | Samoa                            | 10     |
|  | Serbia                           | 1,290  |
|  | South Africa                     | 10,192 |
|  | Sri Lanka                        | 3,700  |
|  | St. Vincent and the Grenadines   | 47     |
|  | Sudan                            | 77     |
|  | Tajikistan                       | 11,521 |
|  | Thailand                         | 10,670 |
|  | Timor-Leste                      | 119    |
|  | Trinidad and Tobago              | 432    |

|                                                                                                                      |              |        |
|----------------------------------------------------------------------------------------------------------------------|--------------|--------|
|                                                                                                                      | Tunisia      | 183    |
|                                                                                                                      | Turkmenistan | 305    |
|                                                                                                                      | Uganda       | 12,395 |
|                                                                                                                      | Ukraine      | 15,811 |
|                                                                                                                      | Uruguay      | 305    |
|                                                                                                                      | Uzbekistan   | 3,199  |
|                                                                                                                      | Yemen, Rep.  | 247    |
|                                                                                                                      | Zambia       | 2,712  |
|                                                                                                                      | Zimbabwe     | 1,346  |
| WHO Resilient and people-centered health systems: Progress, challenges, and future directions in Asia. <sup>59</sup> | Philippines  | 31,379 |
| World Bank-HNP Discussion Paper <sup>60</sup>                                                                        | Indonesia    | 50,016 |
| Oxford Business Group, Weill Medical Qatar Annual Report 2018 <sup>57-58</sup>                                       | Qatar        | 13     |

**‘Indirect’ Annual Graduate Estimates**

In cases where no direct estimate exists, a 'stock-based estimate' (SBE) of the required production to maintain the 2018 density of physicians or nurse/midwives is estimated for each country (after accounting for expatriation and attrition). Attrition is a function of country-specific annual mortality probability during working years (proxied by age 15-60 mortality rates), likelihood of retirement (assumed to be ~1.5% per year less the mortality probability for the 'retiring' subset). The estimate also accounts for the expatriation rate of country-born physicians or nurses. Workforce, Mortality Rates, Population (and Population Growth) are sources from World Bank World Development Indicators.<sup>61</sup> Expatriation rates (by birth country, separately for physician and nurses) are proxied by emigration to OECD countries.<sup>62</sup>

Lastly, unlike the prior 2010 estimate, we account for the population growth rate (assuming states aim to at least maintain the physicians or nurse density), not just total number of physicians or nurses, in their country.

**Figure 3: Graduate Estimates-SBE Framework**

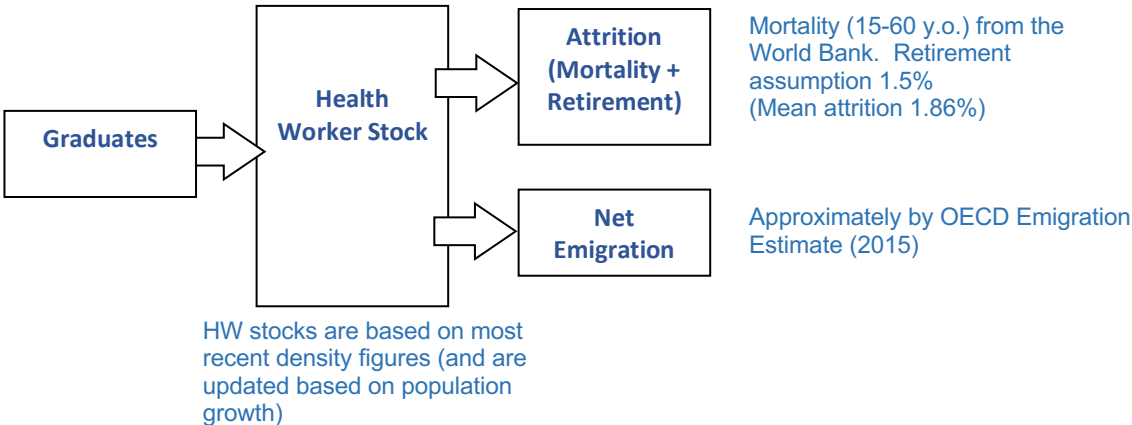



Specifically, when implementing the SBE method, the annual number of graduates for each country were calculated as:

$$Eq.5 \text{ Annual Graduates}_{c,t} = \frac{Stock_{c,t} * (Attrition Rate_{c,t} + Pop. Growth Rate_{c,t})}{(1 - Emigration Rate_c)}$$

where the emigration rate ideally equals the share of domestic-trained health workers who emigrate. The attrition rate has two components A) the probability of death and B) the probability of retirement. WB/WHO adult mortality death (age 15-60) data allows for an estimate of the probability of death at the country specific level (assuming that physicians die at the same rate as adults). The assumption for the probability of retirement will be .015, but we also reduce this by the probability of death during the final year of work (for those unluckily enough to expire upon/just prior to retirement). Specifically,

$$Attrition Rate_{c,t} = A_{c,t} + (B_{c,t} * (1 - A_{c,t}))$$

A=Adult mortality probability<sub>c,t</sub> : Age 15 – 60

B=Estimated rate of retirements based on 50 years service (.02)

These stock-based estimates likely yield underestimates for graduate production and overall expenditures for those countries in which the stock of physicians is rapidly growing. SBEs assume a static stock level. In countries with large growing stocks, the differences could be quite pronounced (such as China). In most cases stocks which will be derived from the WHO data there usually is an updated record within the last three years—so it is unlikely stocks will have grown appreciably (along with the expected production of physicians or nurses/midwives based on these stocks for those countries not reporting direct physician or nurse/midwife graduation figures)

Once we have estimates for the production of health workers in each country (either via a directly reported estimate or via SBE), we will sum to calculate estimated global annual production of health workers (physicians and nurses/midwives). Each country level production estimate will also naturally be used to calculate total educational expenditures (by country and health worker type). All calculations will be conducted in Excel or Stata.

### Estimating Overall Expenditures

As indicated in Eq. 1, once country-level estimates of graduates and cost per graduate are available for each cadre, we can estimate annual expenditures and sum, either regionally or globally, to generate aggregate annual costs for training.

**Table 7: Doctor Expenditure Estimates, by Model**

| Physician Expenditure Models(\$US, 2018: Millions) |                                 |                              |                               |                              |                             |                              |                             |                              |
|----------------------------------------------------|---------------------------------|------------------------------|-------------------------------|------------------------------|-----------------------------|------------------------------|-----------------------------|------------------------------|
| Model Characteristics                              | Regression Sample Substitution? | Model 1<br>All (n=56)<br>Yes | Model 2<br>Econ (n=15)<br>Yes | Model 3<br>Econ (n=15)<br>No | Model 4<br>All (n=56)<br>No | Model 5<br>All (n=56)<br>Yes | Model 6<br>All (n=56)<br>No | Model 7<br>All (n=56)<br>Yes |
|                                                    | Regression Covariate(s)         | Income, Region*              | Income                        | Income                       | Income                      | Income                       | Income Band, Region         | Income Band, Region          |
| Expenditure by Region                              | China                           | \$3,429                      | \$3,429                       | \$7,641                      | \$6,113                     | \$3,429                      | \$10,449                    | \$3,429                      |
|                                                    | India                           | \$8,929                      | \$8,929                       | \$9,702                      | \$7,663                     | \$8,929                      | \$7,574                     | \$8,929                      |
|                                                    | Other Asia                      | \$2,499                      | \$2,932                       | \$3,334                      | \$2,637                     | \$2,499                      | \$3,556                     | \$3,177                      |
|                                                    | Central Asia                    | \$774                        | \$977                         | \$977                        | \$774                       | \$774                        | \$954                       | \$954                        |
|                                                    | Asia Pacific High Income        | \$4,523                      | \$4,933                       | \$4,761                      | \$4,069                     | \$4,523                      | \$6,299                     | \$5,928                      |
|                                                    | Europe Central                  | \$812                        | \$912                         | \$1,061                      | \$857                       | \$812                        | \$1,724                     | \$1,126                      |
|                                                    | Europe Eastern                  | \$2,119                      | \$2,640                       | \$2,640                      | \$2,119                     | \$2,119                      | \$2,848                     | \$2,848                      |
|                                                    | Europe Western                  | \$12,174                     | \$13,368                      | \$14,012                     | \$11,984                    | \$12,174                     | \$12,014                    | \$12,695                     |
|                                                    | North America                   | \$13,512                     | \$13,512                      | \$10,828                     | \$9,533                     | \$13,512                     | \$14,095                    | \$13,512                     |
|                                                    | LAC                             | \$4,330                      | \$4,991                       | \$5,182                      | \$4,146                     | \$4,330                      | \$6,967                     | \$7,059                      |
|                                                    | MENA                            | \$6,857                      | \$5,436                       | \$5,440                      | \$4,540                     | \$4,671                      | \$6,111                     | \$5,766                      |
|                                                    | SSA                             | \$593                        | \$851                         | \$1,397                      | \$1,103                     | \$734                        | \$717                       | \$525                        |
|                                                    | <b>Total</b>                    |                              | <b>\$60,551</b>               | <b>\$62,909</b>              | <b>\$66,973</b>             | <b>\$55,537</b>              | <b>\$58,506</b>             | <b>\$73,308</b>              |

\*In Model 1, the regression results using income as a covariate are generally relied on, but in two regions (SSA and MENA) where the regression that included both income and region were a better, we rely on the estimates from that region.

Table 7 summarizes annual training expenditures across seven different model variants for physicians. Three key variables are adjusted. First, we can use either the full sample (n=56 studies) or a subsample (just economic studies,

n=15) for the costing regression that is used to estimate costs. Second, we can either rely only on the regression for ALL country cost estimates OR substitute the direct estimate for countries where they exist (This choice seems to have the most influence in China). Lastly, the regressions that support the cost estimates may differ with respect to the covariates (income per capita, region and/or income band). The model characteristics in Table 7 reflect the choices made for each of the models. Table 8 shows the same results for Nurses. Model 1 is the ‘lead’ model and generally appears to fall in the middle of the range at the global level.

**Table 8: Doctor Expenditure Estimates, by Model**

| Nurse Expenditure Models(\$US, 2018: Millions) |                                 |                              |                               |                              |                             |                              |                             |                              |
|------------------------------------------------|---------------------------------|------------------------------|-------------------------------|------------------------------|-----------------------------|------------------------------|-----------------------------|------------------------------|
| Model Characteristics                          | Regression Sample Substitution? | Model 1<br>All (n=56)<br>Yes | Model 2<br>Econ (n=15)<br>Yes | Model 3<br>Econ (n=15)<br>No | Model 4<br>All (n=56)<br>No | Model 5<br>All (n=56)<br>Yes | Model 6<br>All (n=56)<br>No | Model 7<br>All (n=56)<br>Yes |
|                                                | Regression Covariate(s)         | Income, Region*              | Income                        | Income                       | Income                      | Income                       | Income Band, Region         | Income Band, Region          |
| Expenditure by Region                          | China                           | \$816                        | \$816                         | \$1,818                      | \$1,455                     | \$816                        | \$2,487                     | \$816                        |
|                                                | India                           | \$4,509                      | \$4,509                       | \$4,900                      | \$3,870                     | \$4,509                      | \$3,825                     | \$4,509                      |
|                                                | Other Asia                      | \$1,748                      | \$1,992                       | \$2,123                      | \$1,681                     | \$1,748                      | \$2,680                     | \$2,591                      |
|                                                | Central Asia                    | \$393                        | \$495                         | \$495                        | \$393                       | \$393                        | \$417                       | \$417                        |
|                                                | Asia Pacific High Income        | \$5,548                      | \$6,244                       | \$6,277                      | \$5,341                     | \$5,548                      | \$8,442                     | \$8,150                      |
|                                                | Europe Central                  | \$317                        | \$366                         | \$410                        | \$332                       | \$317                        | \$685                       | \$519                        |
|                                                | Europe Eastern                  | \$280                        | \$352                         | \$352                        | \$280                       | \$280                        | \$268                       | \$268                        |
|                                                | Europe Western                  | \$7,973                      | \$8,664                       | \$9,120                      | \$7,843                     | \$7,973                      | \$7,228                     | \$7,817                      |
|                                                | North America                   | \$21,390                     | \$21,390                      | \$17,118                     | \$15,072                    | \$21,390                     | \$22,226                    | \$21,390                     |
|                                                | LAC                             | \$2,004                      | \$2,202                       | \$2,290                      | \$1,831                     | \$2,004                      | \$2,535                     | \$2,662                      |
|                                                | MENA                            | \$3,165                      | \$2,279                       | \$2,280                      | \$1,864                     | \$1,910                      | \$2,986                     | \$2,867                      |
|                                                | SSA                             | \$611                        | \$757                         | \$1,335                      | \$1,054                     | \$691                        | \$668                       | \$582                        |
|                                                | <b>Total</b>                    |                              | <b>\$48,754</b>               | <b>\$50,066</b>              | <b>\$48,517</b>             | <b>\$41,016</b>              | <b>\$47,580</b>             | <b>\$54,447</b>              |

\*In Model 1, the regression results using income as a covariate are generally relied on, but in two regions (SSA and MENA) where the regression that included both income and region were a better, we rely on the estimates from that region.

Tables 9 and 10 offer overall updates to the 2010 Commission Report (Tables 1 and 2 in the report) based on our production and expenditure results (Model 1 is used as the base case expenditure model for these tables). Similar to graduate data, health workforce numbers were available and obtained from WHO Health Workforce Portal which were cross-referenced with the OECD database. Health workforce is defined using the International Standard of Classification of Occupations 8<sup>th</sup> revisions (ISCO-08) from the International Labor Organization.<sup>63</sup> The following categories were used to estimate the health workforce totals in Table 9.

Doctors: 2211 (general medical practitioners), 2212 (specialist medical practitioner), and medical practitioners not further defined as general or specialist.

The sum of ‘Nurses’ and ‘Midwives’ is used to estimate the total nurse/midwife category.

Nurses: 2221 (nursing professionals), 3221 (nursing associate professionals), and nursing personnel not further defined by respective countries as professional or associate.

Midwifery personnel: 2222 (midwifery professionals), 3222 (midwifery associate professionals) and midwifery personnel not further defined by respective countries as professional or associate.

Although the 2010 Lancet Commission report covered medical, nursing, and public health schools, we were only able to update medical and public health schools. Medical school numbers were available and obtained from the World Directory of Medical Schools.<sup>64</sup> The World Directory defines a “medical school” as an educational institution that provides a complete or full program of instruction leading to a basic medical qualification; that is, a qualification that permits the holder to obtain a license to practice as a medical doctor or physician. Figure 4 depicts number of private and public medical schools by year.

Public health schools were available and obtained from the following sources: Association of Schools of Public Health in Africa,<sup>65</sup> Latin American and Caribbean Association of Public Health Education,<sup>66</sup> Council of Education on Public Health,<sup>67</sup> Asia-Pacific Academic Consortium for Public Health,<sup>68</sup> and the Association of School of Public Health in the European Region.<sup>69</sup> Nursing schools lacked comparable international databases and the availability and content of national statistics varied greatly.

We could not find a global goal for professional nurses-to-population. We found per country ratios but could not determine their means and ranges of existing nor ideal global ratios. There is no established standard for countries to use as a benchmark as they establish educational and practice goals.

**Table 9: Production and Workforce (by Region)**

|                           | Population Mill. (2018) | 2018 Est. Graduates per Year (1000s) |            | 2018 Workforce (1000s) |            | Est. Number of Schools (2018) |         | % Medical School Private (2018) |
|---------------------------|-------------------------|--------------------------------------|------------|------------------------|------------|-------------------------------|---------|---------------------------------|
|                           |                         | Doctors                              | Nurses/MWs | Doctors                | Nurses/MWs | Public Health                 | Medical |                                 |
| <b>Asia</b>               |                         |                                      |            |                        |            |                               |         |                                 |
| China                     | 1,393                   | 93                                   | 99         | 2,767                  | 3,721      | 153                           | 157     | 1.9%                            |
| India                     | 1,353                   | 128                                  | 323        | 1,171                  | 2,360      | 60                            | 457     | 52.1%                           |
| Other                     | 1,141                   | 46                                   | 155        | 879                    | 2,195      | 65                            | 488     | 53.5%                           |
| Central                   | 89                      | 12                                   | 31         | 275                    | 723        | 3                             | 71      | 35.2                            |
| High Income Asia Pacific  | 250                     | 20                                   | 143        | 565                    | 2,354      | 54                            | 161     | 42.2%                           |
| <b>Europe</b>             |                         |                                      |            |                        |            |                               |         |                                 |
| Central                   | 82                      | 10                                   | 19         | 223                    | 525        | 17                            | 72      | 12.5%                           |
| Eastern                   | 209                     | 28                                   | 21         | 806                    | 1,705      | 9                             | 124     | 6.5%                            |
| Western                   | 436                     | 60                                   | 180        | 1,644                  | 4,328      | 70                            | 283     | 9.5%                            |
| <b>America</b>            |                         |                                      |            |                        |            |                               |         |                                 |
| North America             | 364                     | 29                                   | 227        | 955                    | 5,149      | 99                            | 212     | 44.8%                           |
| LAC                       | 638                     | 56                                   | 126        | 1,454                  | 3,263      | 80                            | 776     | 58.1%                           |
| <b>Africa/Middle East</b> |                         |                                      |            |                        |            |                               |         |                                 |
| MENA                      | 533                     | 41                                   | 106        | 767                    | 1,403      | 51                            | 330     | 19.7%                           |
| SSA                       | 1,099                   | 18                                   | 89         | 246                    | 1,072      | 62                            | 253     | 24.9%                           |
| <b>World</b>              | 7,585                   | 542                                  | 1,518      | 11,752                 | 28,798     | 723                           | 3,384   | 38.8%                           |

**Figure 4: Number of new public and private medical schools by year**

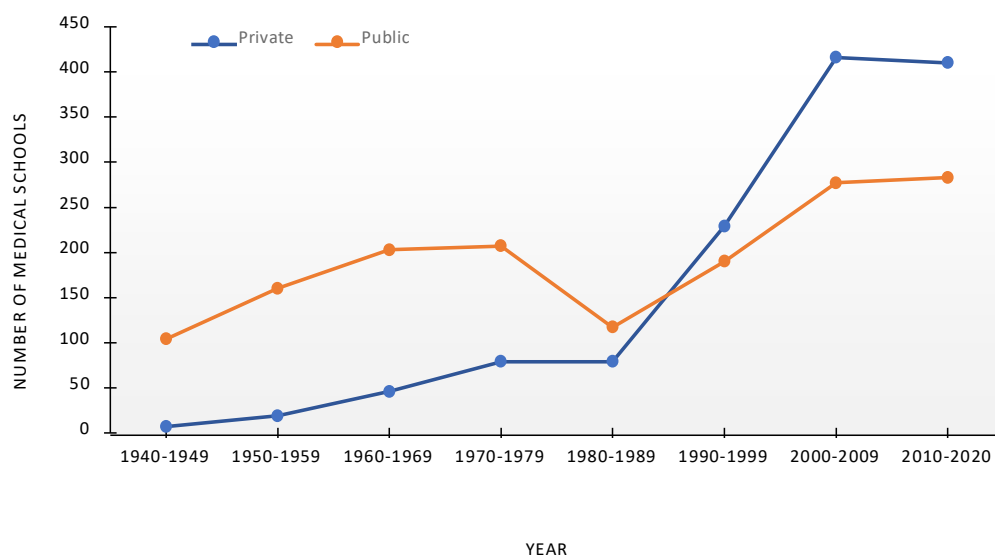

**Table 10: Production and Expenditures (by Region)**

|                           | 2018 Est. Graduates per Year (1000s) |            | 2018 Est. Expenditures per Graduate (\$US 1000s) |            | 2018 Est. Total Expenditures (\$US Billions) |            |
|---------------------------|--------------------------------------|------------|--------------------------------------------------|------------|----------------------------------------------|------------|
|                           | Doctors                              | Nurses/MWs | Doctors                                          | Nurses/MWs | Doctors                                      | Nurses/MWs |
| <b>Asia</b>               |                                      |            |                                                  |            |                                              |            |
| China                     | 93                                   | 99         | 41                                               | 8          | 3.8                                          | 0.8        |
| India                     | 128                                  | 323        | 70                                               | 14         | 8.9                                          | 4.5        |
| Other                     | 46                                   | 155        | 54                                               | 11         | 2.5                                          | 1.7        |
| Central                   | 12                                   | 31         | 63                                               | 13         | 0.8                                          | 0.4        |
| High Income Asia Pacific  | 20                                   | 143        | 223                                              | 39         | 4.5                                          | 5.5        |
| <b>Europe</b>             |                                      |            |                                                  |            |                                              |            |
| Central                   | 10                                   | 19         | 80                                               | 17         | 0.8                                          | 0.3        |
| Eastern                   | 28                                   | 21         | 77                                               | 13         | 2.1                                          | 0.3        |
| Western                   | 60                                   | 180        | 204                                              | 44         | 12.2                                         | 8.0        |
| <b>America</b>            |                                      |            |                                                  |            |                                              |            |
| North America             | 29                                   | 227        | 469                                              | 94         | 13.5                                         | 21.4       |
| LAC                       | 56                                   | 126        | 77                                               | 16         | 4.3                                          | 2.0        |
| <b>Africa/Middle East</b> |                                      |            |                                                  |            |                                              |            |
| MENA                      | 41                                   | 106        | 166                                              | 30         | 6.9                                          | 3.2        |
| SSA                       | 18                                   | 89         | 32                                               | 7          | 0.6                                          | 0.6        |
| <b>World</b>              | 542                                  | 1,518      | 112                                              | 32         | 60.9                                         | 48.8       |

Lastly Table 11 lists which countries are categorized in each region for the 2018 analysis.

**Table 11: Country Mapping for Regions**

| World Bank Country Code | Country                   | Study Region Code | Study Region |
|-------------------------|---------------------------|-------------------|--------------|
| CHN                     | China                     | 1                 | China        |
| IND                     | India                     | 2                 | India        |
| AFG                     | Afghanistan               | 3                 | Other Asia   |
| BGD                     | Bangladesh                | 3                 | Other Asia   |
| BTN                     | Bhutan                    | 3                 | Other Asia   |
| IDN                     | Indonesia                 | 3                 | Other Asia   |
| KHM                     | Cambodia                  | 3                 | Other Asia   |
| LAO                     | Lao PDR                   | 3                 | Other Asia   |
| LKA                     | Sri Lanka                 | 3                 | Other Asia   |
| MDV                     | Maldives                  | 3                 | Other Asia   |
| MMR                     | Myanmar                   | 3                 | Other Asia   |
| MNG                     | Mongolia                  | 3                 | Other Asia   |
| MUS                     | Mauritius                 | 3                 | Other Asia   |
| MYS                     | Malaysia                  | 3                 | Other Asia   |
| NPL                     | Nepal                     | 3                 | Other Asia   |
| PAK                     | Pakistan                  | 3                 | Other Asia   |
| PHL                     | Philippines               | 3                 | Other Asia   |
| PRK                     | Korea, Dem. People's Rep. | 3                 | Other Asia   |
| THA                     | Thailand                  | 3                 | Other Asia   |
| TLS                     | Timor-Leste               | 3                 | Other Asia   |
| VNM                     | Vietnam                   | 3                 | Other Asia   |

|     |                        |   |                   |
|-----|------------------------|---|-------------------|
| ARM | Armenia                | 4 | Central Asia      |
| AZE | Azerbaijan             | 4 | Central Asia      |
| GEO | Georgia                | 4 | Central Asia      |
| KAZ | Kazakhstan             | 4 | Central Asia      |
| KGZ | Kyrgyz Republic        | 4 | Central Asia      |
| TJK | Tajikistan             | 4 | Central Asia      |
| TKM | Turkmenistan           | 4 | Central Asia      |
| UZB | Uzbekistan             | 4 | Central Asia      |
| ASM | American Samoa         | 5 | Asia Pac High Inc |
| AUS | Australia              | 5 | Asia Pac High Inc |
| BRN | Brunei Darussalam      | 5 | Asia Pac High Inc |
| FJI | Fiji                   | 5 | Asia Pac High Inc |
| FSM | Micronesia, Fed. Sts.  | 5 | Asia Pac High Inc |
| HKG | China: Hong Kong SAR   | 5 | Asia Pac High Inc |
| JPN | Japan                  | 5 | Asia Pac High Inc |
| KIR | Kiribati               | 5 | Asia Pac High Inc |
| KOR | Korea, Rep.            | 5 | Asia Pac High Inc |
| MAC | China: Macao SAR       | 5 | Asia Pac High Inc |
| MHL | Marshall Islands       | 5 | Asia Pac High Inc |
| NCL | New Caledonia          | 5 | Asia Pac High Inc |
| NRU | Nauru                  | 5 | Asia Pac High Inc |
| NZL | New Zealand            | 5 | Asia Pac High Inc |
| PLW | Palau                  | 5 | Asia Pac High Inc |
| PNG | Papua New Guinea       | 5 | Asia Pac High Inc |
| PYF | French Polynesia       | 5 | Asia Pac High Inc |
| SGP | Singapore              | 5 | Asia Pac High Inc |
| SLB | Solomon Islands        | 5 | Asia Pac High Inc |
| TON | Tonga                  | 5 | Asia Pac High Inc |
| TUV | Tuvalu                 | 5 | Other Asia        |
| VUT | Vanuatu                | 5 | Asia Pac High Inc |
| WSM | Samoa                  | 5 | Asia Pac High Inc |
| ALB | Albania                | 6 | Europe Central    |
| BGR | Bulgaria               | 6 | Europe Central    |
| BIH | Bosnia and Herzegovina | 6 | Europe Central    |
| HRV | Croatia                | 6 | Europe Central    |
| HUN | Hungary                | 6 | Europe Central    |
| MNE | Montenegro             | 6 | Europe Central    |
| POL | Poland                 | 6 | Europe Central    |
| ROU | Romania                | 6 | Europe Central    |

|     |                    |   |                |
|-----|--------------------|---|----------------|
| SRB | Serbia             | 6 | Europe Central |
| SVK | Slovak Republic    | 6 | Europe Central |
| SVN | Slovenia           | 6 | Europe Central |
| XKX | Kosovo             | 6 | Europe Central |
| BLR | Belarus            | 7 | Europe Eastern |
| EST | Estonia            | 7 | Europe Eastern |
| LTU | Lithuania          | 7 | Europe Eastern |
| LVA | Latvia             | 7 | Europe Eastern |
| MDA | Moldova            | 7 | Europe Eastern |
| MKD | North Macedonia    | 7 | Europe Eastern |
| RUS | Russian Federation | 7 | Europe Eastern |
| UKR | Ukraine            | 7 | Europe Eastern |
| AND | Andorra            | 8 | Europe Western |
| AUT | Austria            | 8 | Europe Western |
| BEL | Belgium            | 8 | Europe Western |
| CHE | Switzerland        | 8 | Europe Western |
| CHI | Channel Islands    | 8 | Europe Western |
| CYP | Cyprus             | 8 | Europe Western |
| CZE | Czech Republic     | 8 | Europe Western |
| DEU | Germany            | 8 | Europe Western |
| DNK | Denmark            | 8 | Europe Western |
| ESP | Spain              | 8 | Europe Western |
| FIN | Finland            | 8 | Europe Western |
| FRA | France             | 8 | Europe Western |
| FRO | Faroe Islands      | 8 | Europe Western |
| GBR | United Kingdom     | 8 | Europe Western |
| GIB | Gibraltar          | 8 | Europe Western |
| GRC | Greece             | 8 | Europe Western |
| GRL | Greenland          | 8 | Europe Western |
| GUM | Guam               | 8 | Europe Western |
| IMN | Isle of Man        | 8 | Europe Western |
| IRL | Ireland            | 8 | Europe Western |
| ISL | Iceland            | 8 | Europe Western |
| ITA | Italy              | 8 | Europe Western |
| LIE | Liechtenstein      | 8 | Europe Western |
| LUX | Luxembourg         | 8 | Europe Western |
| MCO | Monaco             | 8 | Europe Western |
| MLT | Malta              | 8 | Europe Western |
| NLD | Netherlands        | 8 | Europe Western |

|     |                          |    |                |
|-----|--------------------------|----|----------------|
| NOR | Norway                   | 8  | Europe Western |
| PRT | Portugal                 | 8  | Europe Western |
| SMR | San Marino               | 8  | Europe Western |
| SWE | Sweden                   | 8  | Europe Western |
| CAN | Canada                   | 9  | North America  |
| USA | United States            | 9  | North America  |
| ABW | Aruba                    | 10 | LAC            |
| ARG | Argentina                | 10 | LAC            |
| ATG | Antigua and Barbuda      | 10 | LAC            |
| BHS | Bahamas                  | 10 | LAC            |
| BLZ | Belize                   | 10 | LAC            |
| BMU | Bermuda                  | 10 | LAC            |
| BOL | Bolivia                  | 10 | LAC            |
| BRA | Brazil                   | 10 | LAC            |
| BRB | Barbados                 | 10 | LAC            |
| BVG | British Virgin Islands   | 10 | LAC            |
| CHL | Chile                    | 10 | LAC            |
| COL | Colombia                 | 10 | LAC            |
| CRI | Costa Rica               | 10 | LAC            |
| CUB | Cuba                     | 10 | LAC            |
| CUW | Curacao                  | 10 | LAC            |
| CYM | Cayman Islands           | 10 | LAC            |
| DMA | Dominica                 | 10 | LAC            |
| DOM | Dominican Republic       | 10 | LAC            |
| ECU | Ecuador                  | 10 | LAC            |
| GRD | Grenada                  | 10 | LAC            |
| GTM | Guatemala                | 10 | LAC            |
| GUY | Guyana                   | 10 | LAC            |
| HND | Honduras                 | 10 | LAC            |
| HTI | Haiti                    | 10 | LAC            |
| JAM | Jamaica                  | 10 | LAC            |
| KNA | St. Kitts and Nevis      | 10 | LAC            |
| LCA | St. Lucia                | 10 | LAC            |
| MAF | St. Martin (French part) | 10 | LAC            |
| MEX | Mexico                   | 10 | LAC            |
| NIC | Nicaragua                | 10 | LAC            |
| PAN | Panama                   | 10 | LAC            |
| PER | Peru                     | 10 | LAC            |
| PRI | Puerto Rico              | 10 | LAC            |

|     |                                |    |      |
|-----|--------------------------------|----|------|
| PRY | Paraguay                       | 10 | LAC  |
| SLV | El Salvador                    | 10 | LAC  |
| SUR | Suriname                       | 10 | LAC  |
| SXM | Sint Maarten (Dutch part)      | 10 | LAC  |
| TCA | Turks and Caicos Islands       | 10 | LAC  |
| TTO | Trinidad and Tobago            | 10 | LAC  |
| URY | Uruguay                        | 10 | LAC  |
| VCT | St. Vincent and the Grenadines | 10 | LAC  |
| VEN | Venezuela, RB                  | 10 | LAC  |
| VIR | Virgin Islands (U.S.)          | 10 | LAC  |
| ARE | United Arab Emirates           | 11 | MENA |
| BHR | Bahrain                        | 11 | MENA |
| DZA | Algeria                        | 11 | MENA |
| EGY | Egypt, Arab Rep.               | 11 | MENA |
| IRN | Iran, Islamic Rep.             | 11 | MENA |
| IRQ | Iraq                           | 11 | MENA |
| ISR | Israel                         | 11 | MENA |
| JOR | Jordan                         | 11 | MENA |
| KWT | Kuwait                         | 11 | MENA |
| LBN | Lebanon                        | 11 | MENA |
| LBY | Libya                          | 11 | MENA |
| MAR | Morocco                        | 11 | MENA |
| OMN | Oman                           | 11 | MENA |
| PSE | West Bank and Gaza             | 11 | MENA |
| QAT | Qatar                          | 11 | MENA |
| SAU | Saudi Arabia                   | 11 | MENA |
| SYR | Syrian Arab Republic           | 11 | MENA |
| TUN | Tunisia                        | 11 | MENA |
| TUR | Turkey                         | 11 | MENA |
| YEM | Yemen, Rep.                    | 11 | MENA |
| AGO | Angola                         | 12 | SSA  |
| BDI | Burundi                        | 12 | SSA  |
| BEN | Benin                          | 12 | SSA  |
| BFA | Burkina Faso                   | 12 | SSA  |
| BWA | Botswana                       | 12 | SSA  |
| CAF | Central African Republic       | 12 | SSA  |
| CIV | Cote d'Ivoire                  | 12 | SSA  |
| CMR | Cameroon                       | 12 | SSA  |
| COD | Congo, Dem. Rep.               | 12 | SSA  |



|     |                       |    |     |
|-----|-----------------------|----|-----|
| COG | Congo, Rep.           | 12 | SSA |
| COM | Comoros               | 12 | SSA |
| CPV | Cabo Verde            | 12 | SSA |
| DJI | Djibouti              | 12 | SSA |
| ERI | Eritrea               | 12 | SSA |
| ETH | Ethiopia              | 12 | SSA |
| GAB | Gabon                 | 12 | SSA |
| GHA | Ghana                 | 12 | SSA |
| GIN | Guinea                | 12 | SSA |
| GMB | Gambia, The           | 12 | SSA |
| GNB | Guinea-Bissau         | 12 | SSA |
| GNQ | Equatorial Guinea     | 12 | SSA |
| KEN | Kenya                 | 12 | SSA |
| LBR | Liberia               | 12 | SSA |
| LSO | Lesotho               | 12 | SSA |
| MDG | Madagascar            | 12 | SSA |
| MLI | Mali                  | 12 | SSA |
| MOZ | Mozambique            | 12 | SSA |
| MRT | Mauritania            | 12 | SSA |
| MWI | Malawi                | 12 | SSA |
| NAM | Namibia               | 12 | SSA |
| NER | Niger                 | 12 | SSA |
| NGA | Nigeria               | 12 | SSA |
| RWA | Rwanda                | 12 | SSA |
| SDN | Sudan                 | 12 | SSA |
| SEN | Senegal               | 12 | SSA |
| SLE | Sierra Leone          | 12 | SSA |
| SOM | Somalia               | 12 | SSA |
| SSD | South Sudan           | 12 | SSA |
| STP | Sao Tome and Principe | 12 | SSA |
| SWZ | Eswatini              | 12 | SSA |
| SYC | Seychelles            | 12 | SSA |
| TCO | Chad                  | 12 | SSA |
| TGO | Togo                  | 12 | SSA |
| TZA | Tanzania              | 12 | SSA |
| UGA | Uganda                | 12 | SSA |
| ZAF | South Africa          | 12 | SSA |
| ZMB | Zambia                | 12 | SSA |
| ZWE | Zimbabwe              | 12 | SSA |

## Global Maps

Global maps were created using RStudio (version 4.1.1).

**Figure 1. Density of nursing (top) and medical graduates (bottom) per 1,000 population by country (2018)**

0.0 to < 0.1   0.3 to < 0.5   1.1 to < 2.3   12.0 to < 60.0   NA  
0.1 to < 0.3   0.5 to < 1.1   2.3 to < 12.0   > 60.0

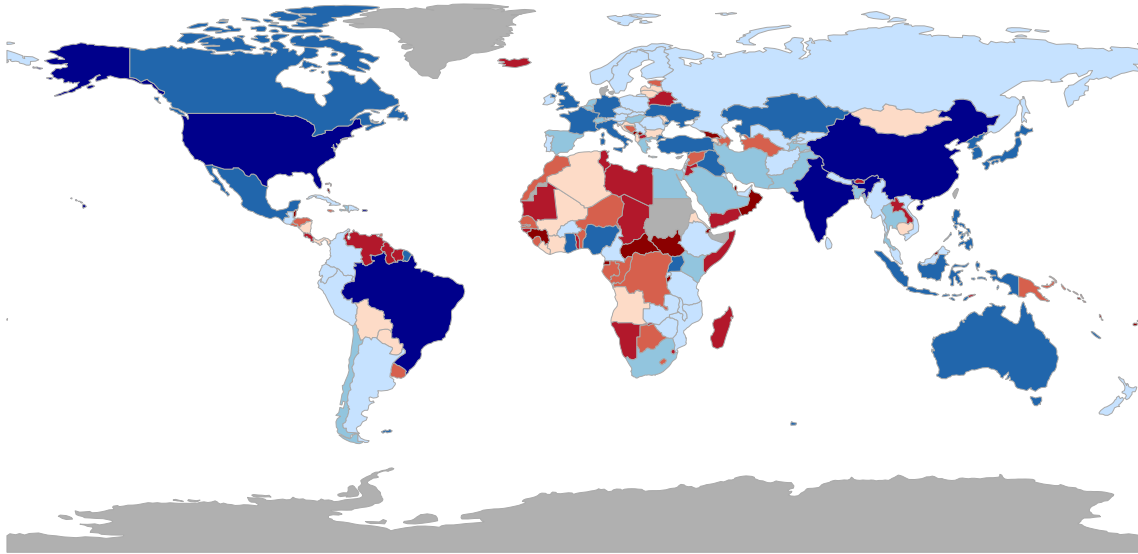

0.0 to < 0.3   0.5 to < 0.8   1.3 to < 2.8   5.5 to < 26.0   NA  
0.3 to < 0.5   0.8 to < 1.3   2.8 to < 5.5   > 26.0

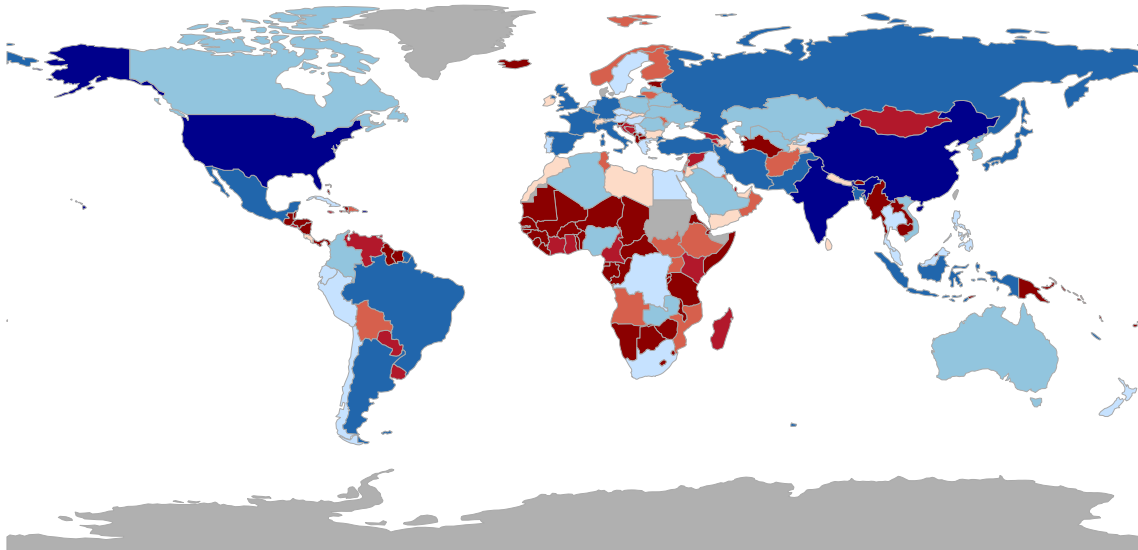

## References

1. Goulston K, Oates K, Shinfield S, Robinson B. Medical student education: what it costs and how it is funded. *Intern Med J* 2012; **42**(10): 1149–52.
2. Oates RK, Goulston KJ. The hidden cost of medical student education: an exploratory study. *Aust Health Rev* 2013; **37**(2): 185–8.
3. Trelha CS, Casarim LF, Almeida MJd, Gordan PA. Are innovative medical curricula more costly? Cost analysis of the Medicine Course of the State University of Londrina. *Revista Brasileira de Educação Médica* 2008; **32**(2):160–73.
4. Valberg LS, Gonyea MA, Sinclair DG, Wade J. Planning the future academic medical centre. *CMAJ* 1994; **151**(11): 1581–7.
5. Gil-Rojas Y, Gil-Tamayo S, Mosos JD, et al. How much does it cost to train a physician in Colombia? *Revista Ciencias de la Salud* 2018; **16**(2): 219–36.
6. Beciu H, Haddad D. Human Resources for Health: Costing Ghana's Pre-Service HRH Scale Up Plans. Washington DC: World Bank, 2009
7. Becui H, Haddad D. Scaling up Education of Health Workers in Ghana: A Country Assessment. Washington DC: World Bank, 2009.
8. Beciu H, Jacob RP. Global Trends in Tertiary Medical Education: Policy Recommendations for Sub-Saharan Africa. Washington DC: World Bank, 2009.
9. Kojuri J, Lotfi F, Amini M, Pilevar A, Esmaealzadeh Z. The Percapita Cost of Training Undergraduate Medical Students in Shiraz School of Medicine 2007. *Strides in Development of Medical Education*. 2010; **7**(1): 9-16.
10. INDECON. The Cost of Undergraduate Medical Education and Training in Ireland. INDECON: International Economic Consultants, 2005.
11. Vimolket T, Kamol-Ratanakul P, Indaratna K. Cost of producing a medical doctor at Chulalongkorn University. *J Med Assoc Thail* 2003; **86**(1): 82–92.
12. PSSRY-UK. Unit Costs of Health and Social Care 2018. University of Kent (UK): Personal Social Services Research Unit (PSSRU), 2019.
13. Jones RF, Korn D. On the cost of educating a medical student. *Acad Med* 1997; **72**(3): 200–10.
14. AAMC. The Financing of Medical Schools: A Report of the AAMC Task Force on Medical School Financing. Washington, DC: Association of American Medical Colleges, 1996.
15. Rein MF, Randolph WJ, Short JG, Coolidge KG, Coates ML, Carey RM. Defining the cost of educating undergraduate medical students at the University of Virginia. *Acad Med* 1997; **72**(3): 218–27.
16. Goodwin MC, Gleason WM, Kontos HA. A pilot study of the cost of educating undergraduate medical students at Virginia Commonwealth University. *Acad Med* 1997; **72**(3): 211–7.
17. Franzini L, Low MD, Proll MA. Using a cost-construction model to assess the cost of educating undergraduate medical students at the University of Texas-Houston Medical School. *Acad Med* 1997; **72**(3): 228–37.
18. American University of the Cribbean School of Medicine. <https://med.aucmed.edu> (accessed July 15, 2015).
19. Aureus School of Medicine. <https://www.aureusuniversity.com/> (accessed July 13, 2015).
20. Monash University. Annual Report 2014. Melbourne, Australia: Monash University, 2014.
21. Wadud M. Government Fixes Fee for Private Medical Colleges. *University World News (Global Edition)*. 2014 (Issue 341). <https://www.universityworldnews.com/post.php?story=20141030131458355> (accessed June 15, 2015).
22. American Global University School of Medicine. <https://www.caribbeanmedicalschoools.info/american-global-university-school-of-medicine/> (accessed July 13, 2015).
23. China Medical University: International Education School. Duration, Tuition and Other Fees. <http://www.campuschina.org/universitydetailen.aspx?collegeId=99> (accessed June 28, 2015).
24. University of Nicosia School of Medicine. <https://www.med.unic.ac.cy/> (accessed July 14, 2015)
25. Charles University. <http://www.cuni.cz/UKENG-1.html> (accessed June 30, 2015).
26. All Saints University School of Medicine. <https://allsaintsuniversity.org/> (sccessed July 14, 2015).
27. St. Paul's Hospital Millenium Medical College. <http://www.sphmmc.edu.et> (accessed June 30, 2015).
28. Mills EJ, Kanters S, Hagopian A, et al. The Financial Cost of Doctors Emigrating from Sub-Saharan Africa: Human Capital Analysis. *BMJ* 2011; 343: d7031.
29. Tubingen University. Annual Report 2014. Tubingen, Germany: Tubingen University, 2015.

30. American International School of Medicine. <https://www.caribbeanmedicalschoools.info/american-global-university-school-of-medicine/> (accessed July 14, 2015).
31. Joy S, Ravindran R, Vijayan S, Ugargol AP. Mushrooming of Private Medical Schools in India: The Present Student Profile and Cost of Medical Education and its Impact on Equity, Health Care Accessibility, Cost and Perceived Quality of Health Care. iHEA 2007 6<sup>th</sup> World Congress: Exploring in Health Economic Paper. <http://dx.doi.org/10.2139/ssrn.992143>
32. All American Institute of Medical Sciences. <http://aaims.edu.jm/> (accessed July 10, 2015).
33. University of Jordan Medical School. <http://medicine.ju.edu.jo/Home.aspx> (accessed June 29, 2015).
34. University of Nairobi. Annual Report 2014. Nairobi, Kenya: University of Nairobi, 2015.
35. University of Nairobi. Tuition Fees. <https://www.uonbi.ac.ke> (accessed July 1, 2015).
36. Foundation for Advancement of International Medical Education and Research (FAIMER). International Medical Education Directory. <https://imed.faimer.org> (accessed July 2015).
37. WHO. Overview of Lao Health System Development 2009-2017. Geneva: World Health Organization, 2018.
38. American University in Beirut. Financial Statements (june 2012). Beirut, Lebanon: American University in Beirut, 2012.
39. MAHSA University. School of Medicine Tuition. Malaysia: MAHSA University, 2015.
40. University of Auckland. <https://www.auckland.ac.nz/en.html> (accessed June 24, 2015).
41. Lagos State University Combined Reports and Financial Statements: 2011. Lagos, Nigeria: Lagos State University, 2011.
42. Value MD. <http://www.valuemd.com/som.htm> (accessed July 15, 2015).
43. Poznan Univesity of Medical Sciences. Tuition and Fees (2011-2012). Poland: Poznan University, 2011.
44. National University Singapore. <http://www.nus.edu.sg> (accessed July 15, 2015).
45. National University of Singapore. Annual Report 2014. Singapore: National University Singapore (NUS), 2014.
46. Karolinka Institutet. Karolinka Institutet Annual Report 2014. Stockholm: Karolinka Institutet, 2015.
47. Herbert Kairuki Memorial University. MD Programme: Costs for Tuition, Accommodation, Food and Other Personal Expenses per Student. [www.hkmu.ac.tz](http://www.hkmu.ac.tz) (accessed June 16, 2015).
48. Potucek M. In: Scheffler RM, ed. E-mail with costs for Slovakia and Czech Republic ed2015.
49. Reinhold T. In: Scheffler RM, ed. E mail with cost estimate for Germany ed2015.
50. Iverson T. In: Scheffler RM, ed. Email with Physician Education cost estimate for Norway ed2015.
51. Deb P, Norton EC, Manning WG. Health econometrics using Stata. Vol 3. Texas: Stata Press College Station, 2017.
52. Preker AS, Vujicic M, Durkan Y, Ly C, Beciu H, Materu PN. Scaling Up Health Professional Education. Washington DC: World Bank, 2008.
53. WHO. National Health Workforce Accounts Data Portal. <https://apps.who.int/nhwportal/> (accessed September 16, 2020).
54. OECD. OECD Health Statistics 2021. <https://www.oecd.org/els/health-systems/health-data.htm> (accessed September 16, 2020).
55. Frenk J, Chen L, Bhutta Z, et al. Health professionals for a new century: transforming education to strengthen health systems in an interdependent world. *Lancet* 2010; **376**(9756): 1923–58.
56. LI W. In: Lincoln Chen M, ed. National Center of Health Professions Education Development (Peking University): Dr. Weiming Wang 2020.
57. Demand for health services rises in Qatar. Oxford Business Group, 2020.
58. Weill Medical School Qatar. Annual Report 2018. Weill Medical School Qatar, 2019.
59. WHO. Resilient and people-centred health systems: Progress, challenges and future directions in Asia. New Delhi: WHO, Regional Office for South-East Asia, 2018.
60. Anderson I, Meliala A, Marzoeki P, Pambudi E. THE PRODUCTION, DISTRIBUTION, AND PERFORMANCE OF PHYSICIANS, NURSES, AND MIDWIVES IN INDONESIA: AN UPDATE. Washington DC: World Bank, 2014.
61. World Development Indicators. Washington, DC: World Bank, 2020.
62. OECD. OECD International Migration Outlook 2015. OECD, 2015.
63. International Labor Organization. Part III: Definitions of Major Groups, Sub-Major Groups, Minor Groups and Unit Groups. <https://www.ilo.org/public/english/bureau/stat/isco/docs/groupdefn08.pdf> (accessed on November 15, 2021).

64. World Federation for Medical Education. World Directory of Medical Schools. <https://wfme.org/world-directory/> (accessed September 16, 2020).
65. Association of Schools of Public Health in Africa (ASPHA). ASPHA members. <https://asphaafrica.net/membership/members/> (accessed September 16, 2020).
66. Latin American and Caribbean Association of Public Health Education. <http://www.alaesp.sld.cu/html/instituciones.htm> (accessed September 16, 2020).
67. Council on Education for Public Health. List of accredited schools and programs. <https://ceph.org/about/org-info/who-we-accredit/accredited/> (accessed Sept 16, 2020).
68. Asia-Pacific Academic Consortium for Public Health. <http://www.apacph.org/wp/> (accessed September 16, 2020).
69. The Association of School of Public Health in the European Region (ASPHER). <https://www.aspher.org> (accessed September 16, 2020).

## Annex 2: Citation Analysis and Literature Review

### Methodology: Literature Review of Publication Citing the 2010 Lancet Commission Report

#### Selection of Citation Databases

To develop the sampling methodology, we consulted two research librarians at University of Miami. We first identified appropriate research databases from which to obtain publications citing the 2010 Lancet report. When investigating their accuracy and appropriateness, we used the results of a comparison conducted by Falages et al. (2007)<sup>1</sup> who assessed different research database tools for factors including, but not limited to their extent of journal and field coverage, frequency of literature updates, and the presence of bias in search results.

Four databases were considered. The number of publications citing the 2010 Lancet Commission report<sup>2</sup> were identified in each database by searching the report's title: *Health professionals for a new century: transforming education to strengthen health systems in an interdependent world*. At the time, *Scopus* reported 1,991 citing publications, *Web of Science (WoS) Core Collection*, 1,327, *PubMed*, 638, and *Google Scholar*, 4,070. Table 1 compares the strengths and weaknesses across each database.<sup>1</sup> *Web of Science* and *Scopus* were selected for this review. Both indexed a large number of journals, 8,700 and 12,850, respectively, and covered content from most scientific fields compared to *PubMed* and *Google Scholar*. *Scopus* is an ideal research tool for extracting medical and academic literature and *WoS* is ideal for evaluating the importance and influence of specific publications (Journal Impact Factor (IF)). These functions were suitable for the aim and scope of this citation analysis. Moreover, *Google Scholar* reported the largest number of citing articles, however, the accuracy of its content coverage is uncertain as this database lacks defined journal coverage and contains frequent duplicates. Additionally, the two selected databases are not biased in their search results whereas *PubMed* and *Google Scholar* tend to produce inconsistent and/or biased results.

**Table 1: Research database tools justification**

|                           | Research Database Tools                                                                                                                                                                                                                     |                                                                                                     |                                                                                                                                                 |                                                                                                                   |
|---------------------------|---------------------------------------------------------------------------------------------------------------------------------------------------------------------------------------------------------------------------------------------|-----------------------------------------------------------------------------------------------------|-------------------------------------------------------------------------------------------------------------------------------------------------|-------------------------------------------------------------------------------------------------------------------|
|                           | Scopus                                                                                                                                                                                                                                      | Web of Science                                                                                      | PubMed                                                                                                                                          | Google Scholar                                                                                                    |
| <b>Journal coverage</b>   | 12,850 of which 500 are open access<br>Indexes larger number of journals compared to other search engines                                                                                                                                   | 8,700; Better journal classification system than Scopus                                             | 6,000 of which 827 are open access                                                                                                              | Content coverage is unknown / no journal frame and/or list available                                              |
| <b>Fields</b>             | Covers most scientific fields                                                                                                                                                                                                               | Covers most scientific fields                                                                       | Focuses mainly on medicine and biomedical sciences                                                                                              | Covers most scientific fields                                                                                     |
| <b>Literature updates</b> | Readily updated with printed literature but does not include online early versions                                                                                                                                                          | Updated weekly with printed literature but does not include online early versions                   | Updated daily with printed lit and online early versions before print                                                                           | Updated monthly on average                                                                                        |
| <b>Citation Analysis</b>  | Faster and produces more articles than web of science                                                                                                                                                                                       | Citation analysis has better graphics and is more detailed than the Scopus                          | None                                                                                                                                            | The reference list is shorter compared to other databases.                                                        |
| <b>Search Results</b>     | No bias with relevant results                                                                                                                                                                                                               | No bias with relevant results                                                                       | Produces newest articles first.<br>Produces results peripheral relevance to the subject and relevance is inconsistent                           | Produces results that are most cited first.<br>Results are not related to the quality of publication              |
| <b>Other</b>              | Enhanced utility, for both medical literature search and academic needs.<br>Results produced by Scopus corresponded to its extended listing of included journals with a greater number of citations. False-positive results in Scopus could | Journal impact factor – a tool for evaluating the importance and influence of specific publications | Handy, quick, and easy to use.<br>Offers over 1 million freely available articles of which a significant number come from digitized back issues | Inadequate<br>Web search that aims to reach the widest audience available.<br>Duplicates were a common occurrence |

|  |                                                                                        |  |  |  |
|--|----------------------------------------------------------------------------------------|--|--|--|
|  | be eliminated if one is searching for articles including the keyword in the title only |  |  |  |
|--|----------------------------------------------------------------------------------------|--|--|--|

### Data Searches and Extraction

In September and October 2019, WoS and Scopus databases were searched, respectively, for all articles citing the 2010 Lancet report and published between December 2010 and October 2019. The 2010 Lancet report's title was used as the only key term during these searches: *Health professionals for a new century: transforming education to strengthen health systems in an interdependent world*. No language limits were used during the search. Some publications indexed in the Chinese Citation Database and Book Citation Index could not be extracted from WoS. To increase the possibility to find the missing book chapters, books, and other citing articles, we relied on Scopus database searches.

As recommended by the research librarians, EndNote X9 was used as a practical reference management software. A total of 3,240 publications were imported into EndNote from WoS ( $N = 1,249$ ) and Scopus ( $N = 1,991$ ). 1,076 duplicate references were removed from the complete reference library in EndNote. 30-40% of the PDFs were automatically imported into EndNote. Missing PDFs were manually obtained through various citation databases or interlibrary loan requests.

### Citation Review and Classification

The complete reference library of 2,164 unduplicated citations were randomized in Microsoft Excel and grouped into sets of 100. Given the timeline, it was not practical to review the entire citation library, therefore, 1,000 were blindly reviewed by three reviewers. The literature review methodology was reviewed and vetted by sampling experts from the University of Miami Library and deemed robust thereby justifying our decision to stop the randomized review at 1,000 citations. The citations were screened for eligibility (Table 2) and classified based on Level 1-3 criteria (Table 3). One or more of each level criteria must be met for a reviewer to classify as either Level 1, 2 or 3. Microsoft Excel was used to record results of citations analyses and classification. When level classifications were discordant between two reviewers, third reviewer acted as the tiebreaker.

**Table 2: Inclusion/Exclusion Criteria**

|                                                                                                                                                                                                                                                                                                                                                                                                                                                                                                                                                                          |
|--------------------------------------------------------------------------------------------------------------------------------------------------------------------------------------------------------------------------------------------------------------------------------------------------------------------------------------------------------------------------------------------------------------------------------------------------------------------------------------------------------------------------------------------------------------------------|
| <p>Inclusion Criteria:</p> <ol style="list-style-type: none"> <li>1. Referenced 2010 Lancet report</li> <li>2. Published between December 2010 and October 2019</li> <li>3. Articles and book chapters written in English</li> </ol>                                                                                                                                                                                                                                                                                                                                     |
| <p>Exclusion Criteria:</p> <ol style="list-style-type: none"> <li>1. Non-English publications</li> <li>2. Full books</li> <li>3. Publications whose PDFs are not accessible by the library</li> </ol> <p>*In addition to using the initial inclusion/exclusion criteria, we established a secondary set of exclusion criteria as follows:</p> <ol style="list-style-type: none"> <li>4. Publications withdrawn from publication</li> <li>5. Publications without a reference of 2010 Lancet Report</li> <li>6. Additional duplicates identified in EndNote X9</li> </ol> |

*\*Once the review process began, the reviewers identified additional inclusion/exclusion criteria*

**Table 3: Citation Review and Classification Criteria**

|                                                                                                                                                                                                                                                                                                                                                                                                                                                                                                                                                                                                                                                                             |
|-----------------------------------------------------------------------------------------------------------------------------------------------------------------------------------------------------------------------------------------------------------------------------------------------------------------------------------------------------------------------------------------------------------------------------------------------------------------------------------------------------------------------------------------------------------------------------------------------------------------------------------------------------------------------------|
| <p>Level 1 Citations:</p> <ul style="list-style-type: none"><li>• 2010 Lancet Commission Report cited but no specific point stated OR does not connect to a specific theme in the Lancet report</li><li>• The <i>Lancet</i> Commission or other variant for referencing the 2010 report mentioned in a sentence, but article's focus does not align with the <i>Lancet</i> report's reforms or themes</li><li>• Conducts a literature review of studies or innovations, but does not connect to, align with, or is not inspired by 2010 <i>Lancet</i> report</li><li>• Innovation, models, programs etc. presented were implemented pre-<i>Lancet</i> publication</li></ul> |
| <p>Level 2 Citations:</p> <ul style="list-style-type: none"><li>• Echoes or elaborates on one or more themes covered in the <i>Lancet</i> report</li><li>• Aligns with one or more proposed reforms or themes in 2010 <i>Lancet</i> report, but no new innovation, expansion, framework, model, or novel approach presented or described</li></ul>                                                                                                                                                                                                                                                                                                                          |
| <p>Level 3 Citations:</p> <ul style="list-style-type: none"><li>• Presents, describes, or justifies an innovation, expansion, framework, model, or novel approach which aligns with one or more proposed reforms or themes in 2010 <i>Lancet</i> report</li><li>• Content is inspired by or grounded upon the 2010 <i>Lancet</i> report</li></ul>                                                                                                                                                                                                                                                                                                                           |

Figure 1 outlines the retrospective citation analysis selection process. Of the 896 citations that met the inclusion criteria, 437 were included in the citation analysis review.

### **Key Theme Analysis**

The 437 papers classified as Level 2 or 3 were further reviewed and analyzed to understand the application of the proposed reforms, the diversity of health professions, thematic emphasis, and the geographic distribution of research. The review revealed three most frequently mentioned themes: competency-based education, interprofessional education, and information technology facilitated education. Of the 437 levels 2 and 3 papers, the ones that focused on the respective themes were further examined in depth and included in the synthesis of the key theme analysis.<sup>3-135</sup>



**Figure 1: Citation analysis identification, screening, and classification process**

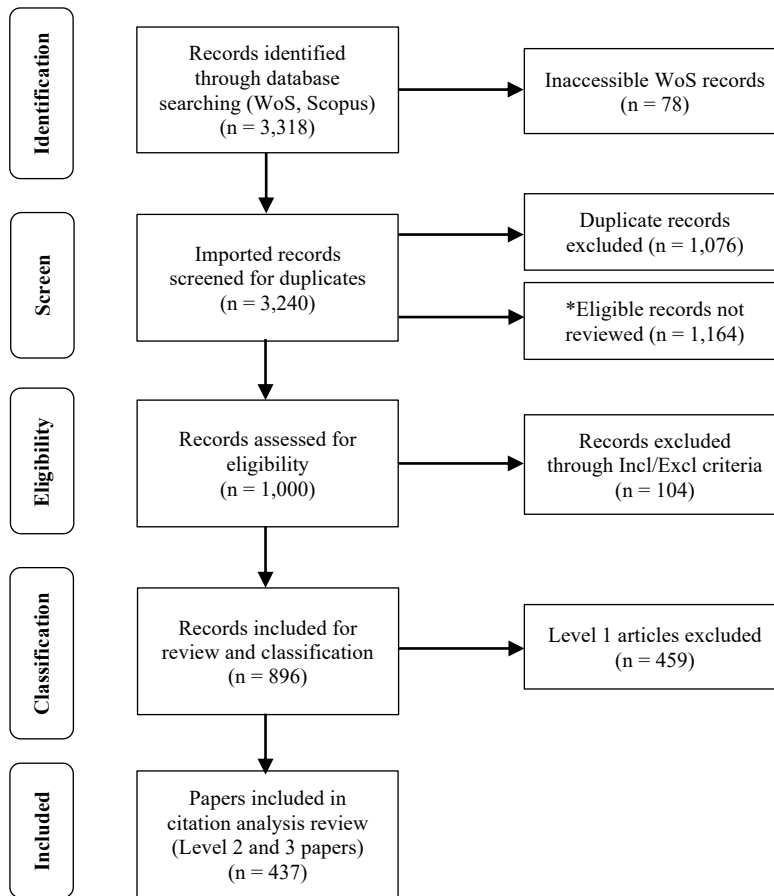

\*1,164 of 2,164 eligible records were not reviewed considering timeline and a consult from a sampling expert.

### **Methodology: Literature Review of the Most Prominent Themes Beyond the 2010 Lancet Commission Report**

In addition to the review of publications citing the Lancet Commission report, we reviewed a selected number of papers that did not cite report to build upon and inform the citation analysis. We then conduct a high-level overview of the literature highlighting the three key themes (competency-based education, interprofessional education and information technology facilitated education) relevant to health professions education throughout the last decade (2010-2019).

Two bibliographic databases were used:

1. Cumulative Index to Nursing and Allied Health Literature (CINAHL)/EBSCOhost
2. MEDLINE, the National Library of Medicine’s database of life sciences/biomedical articles

The search was conducted among all “health professions education” publications and limited to English language articles published from 2011 through 2019, inclusive. *MEDLINE* and *CINAHL* MeSH terms were used to identify papers relevant to our topics regardless of whether they cited the Lancet Commissioner. Over 10,000 publications were identified. Using Digital Object Identifiers (DOI) and Unique Identifiers (UI), the identified papers were imported into *Web of Science Core Collection* because both *MEDLINE* and *CINAHL* do not have sufficient citation analysis capabilities. Once in *Web of Science Core Collection*, we applied inclusion/exclusion criteria to further narrow down the number of publications.

**Tables 4: Inclusion/exclusion criteria**

| Include                                                                                                                                   | Exclude                                                                                                                                                  |
|-------------------------------------------------------------------------------------------------------------------------------------------|----------------------------------------------------------------------------------------------------------------------------------------------------------|
| 1. Articles, reviews<br>2. Abstract available, 2011-19, English<br>3. Published in the <i>WOS</i> Science Citation Index (SCI) - Expanded | 1. Editorials, letters, proceedings, individual/personal descriptive accounts, case studies, webinars, conference, symposium write-ups<br>2. No abstract |

Over 5,000 records satisfied the inclusion criteria (Figure 2). Due to this high volume of papers, we selected 50 most cited publications for each theme (competency-based education, interprofessional education and collaborative practice, and information technology), 150 in total and exported them out for review.

Limitations with this approach:

- a) Recently published articles tended to have been cited fewer times due to the limited time since publication.
- b) The 150 selected articles may not cover all of the topics found in the citation analysis.

We used a similar classification approach (Table 5) from the citation analysis to select the most relevant publications. Of the 150 papers, Level 2 or 3 papers were further analyzed for inclusion in our results.<sup>136-194</sup>

**Table 5: Classification criteria**

|                                                                                                                                                                                                                                                                                                                                                                     |
|---------------------------------------------------------------------------------------------------------------------------------------------------------------------------------------------------------------------------------------------------------------------------------------------------------------------------------------------------------------------|
| Level 1 publications: <ul style="list-style-type: none"> <li>• Descriptive and/or presents a relatively minor point</li> <li>• Publication is too specific (e.g., Plastic surgery)</li> <li>• Publication reviews literature published before 2010</li> </ul>                                                                                                       |
| Level 2 publications: <ul style="list-style-type: none"> <li>• Profound conceptualization of competency-based education (CBE), interprofessional education/collaborative practice (IPECP), or information technology (IT)/online learning that aligns with the general idea presented in the 2010 report</li> <li>• Does not cite the 2010 Lancet report</li> </ul> |
| Level 3 publications: <ul style="list-style-type: none"> <li>• Description of a comprehensive reform or application that aligns with the CBE, IPECP, or IT as presented in the Lancet report</li> <li>• Does not cite the 2010 Lancet report</li> </ul>                                                                                                             |

**Figure 2: Literature review identification, screening, and classification process.**

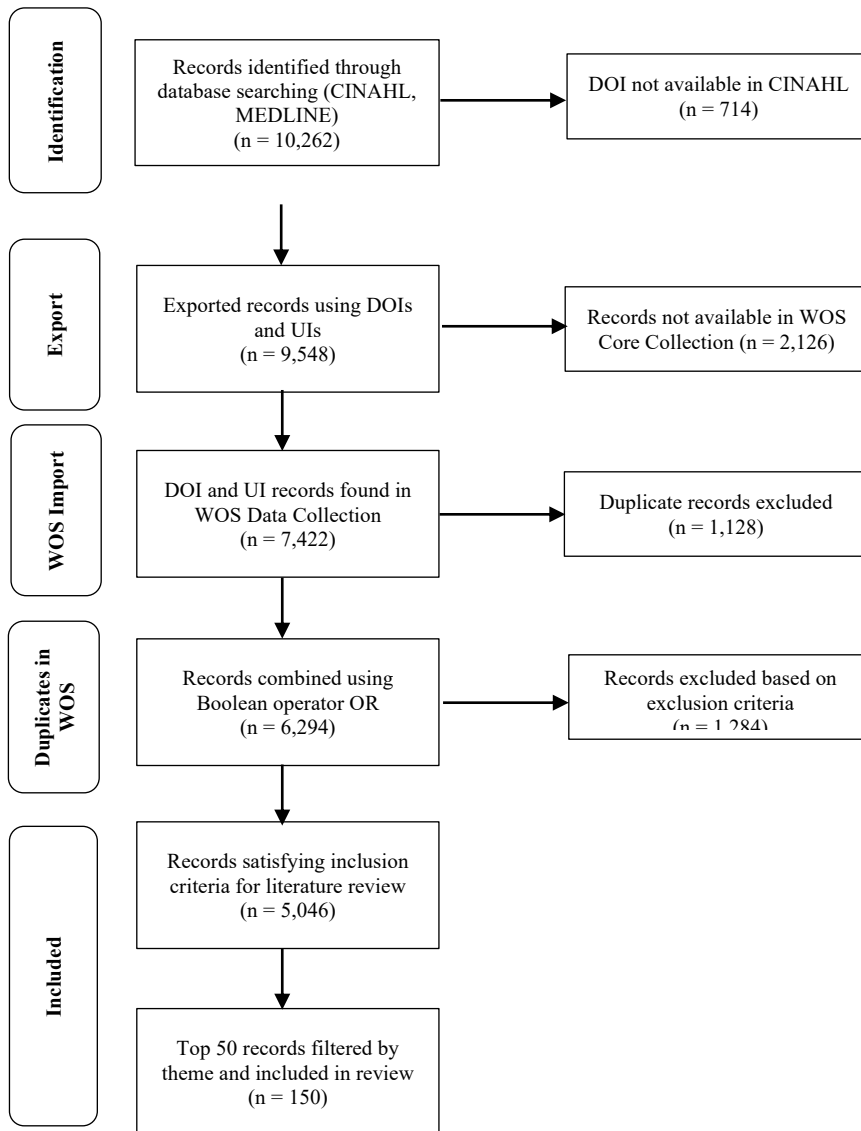

## References

1. Falagas ME, Pitsouni EI, Malietzis GA, Pappas G. Comparison of PubMed, Scopus, Web of Science, and Google Scholar: strengths and weaknesses. *FASEB J* 2008; 22(2): 338–42.
2. Frenk J, Chen L, Bhutta Z, et al. Health professionals for a new century: transforming education to strengthen health systems in an interdependent world. *Lancet* 2010; 376(9756): 1923–58.
3. Thistlethwaite JE. Interprofessional education: Implications and development for medical education. *Educacion Medica* 2015; 16(1): 68–73.
4. Williams B, Brown T, McKenna L, Palermo C, Morgan P, Brightwell R. Students' attitudes toward interprofessional learning a comparison between two universities. *J Allied Health* 2015; 44(4): 201–7.
5. Brewer ML, Flavell H, Trede F, Smith M. Creating change agents for interprofessional education and practice: a leadership programme for academic staff and health practitioners. *International Journal of Leadership in Education* 2018; 21(5): 580–92.
6. Ghebrehiwet T, Ammon M, Burbiel I, Botbol M. Interdisciplinary team approach to clinical care. In: Mezzich J, Botbol M, Christodoulou G, Cloninger C, Salloum I. (eds) *Person Centered Psychiatry*. Springer, Cham, 2016: 211–22. DOI: [https://doi.org/10.1007/978-3-319-39724-5\\_16](https://doi.org/10.1007/978-3-319-39724-5_16).
7. WHO. Frameworks for Action on Interprofessional Education & Collaborative Practice. Geneva: World Health Organization, 2010.
8. Centre for Advancement of Interprofessional Education (CAIPE). What is CAIPE. <https://www.caipe.org/about-us> (accessed June 18, 2020).
9. Botma Y, Snyman S. Africa Interprofessional Education Network (AfrIPEN). *J Interprof Care* 2019; 33(3): 274–6.
10. Kaaya EE, Macfarlane SB, Mkony CA, et al. Educating Enough Competent Health Professionals: Advancing Educational Innovation at Muhimbili University of Health and Allied Sciences, Tanzania. *PloS Med* 2012; 9(8).
11. Wagner LE, Evans RG, Noland D, Barkley R, Sullivan DK, Drisko J. The Next Generation of Dietitians: Implementing Dietetics Education and Practice in Integrative Medicine. *J Am Coll Nutr* 2015; 34(5): 430–5.
12. Tong SF, Mohamad N, Tan CE, Efendie B, Chelliah KK, Gilbert JHV. Transition from uniprofessional towards interprofessional education: The Malaysian experience of a pragmatic model. In: Forman D, Jones M, Thistlethwaite J. (eds) *Leading Research and Evaluation in Interprofessional Education and Collaborative Practice*. Palgrave Macmillan, London, 2016: 169–92. DOI: [https://doi.org/10.1057/978-1-137-53744-7\\_9](https://doi.org/10.1057/978-1-137-53744-7_9).
13. Kent F, Hayes J, Glass S, Rees CE. Pre-registration interprofessional clinical education in the workplace: a realist review. *Med Educ* 2017; 51(9): 903–17.
14. Findyartini A, Kambey DR, Yusra RY, et al. Interprofessional collaborative practice in primary healthcare settings in Indonesia: A mixed-methods study. *J Interprof Educ Pract* 2019; 17.
15. Kahaleh AA, Danielson J, Franson KL, Nuffer WA, Umland EM. An Interprofessional Education Panel on Development, Implementation, and Assessment Strategies. *Am J Pharm Educ* 2015; 79(6).
16. Busari JO, Moll FM, Duits AJ. Understanding the impact of interprofessional collaboration on the quality of care: A case report from a small-scale resource limited health care environment. *J Multidiscip Healthc* 2017; 10: 227–34.
17. Hämel K, Vössing C. The collaboration of general practitioners and nurses in primary care: A comparative analysis of concepts and practices in Slovenia and Spain. *Prim Health Care Res Dev* 2017; 18(5): 492–506.
18. Bonello M, Morris J, Azzopardi Muscat N. The role of national culture in shaping health workforce collaboration: Lessons learned from a case study on attitudes to interprofessional education in Malta. *Health Policy* 2018; 122(10): 1063–9.
19. Brashers V, Owen J, Haizlip J. Interprofessional Education and Practice Guide No. 2: Developing and implementing a center for interprofessional education. *J Interprof Care* 2015; 29(2): 95–9.
20. Brashers V, Erickson JM, Blackhall L, Owen JA, Thomas SM, Conaway MR. Measuring the impact of clinically relevant interprofessional education on undergraduate medical and nursing student competencies: A longitudinal mixed methods approach. *J Interprof Care* 2016; 30(4): 448–57.
21. Brashers V, Haizlip J, Owens JA. The ASPIRE Model: Grounding the IPEC core competencies for interprofessional collaborative practice within a foundational framework. *J Interprof Care* 2019; 34(1): 128–32.
22. Anderson ES, Ford J, Kinnair DJ. Interprofessional Education and Practice Guide No. 6: Developing practice-based interprofessional learning using a short placement model. *J Interprof Care* 2016; 30(4): 433–40.
23. Langlois S. Mapping current health professional curricula: Identifying common topics for an integrated interprofessional education curriculum. *J Interprof Educ Pract* 2016; 5: 7–9.

24. McCloskey L, Condon R, Shanahan CW, Wolff J, Culler C, Kalish R. Public Health, Medicine, and Dentistry as Partners in Community Health: A Pioneering Initiative in Interprofessional, Practice-Based Education. *J Public Health Manag Pract* 2011; **17**(4): 298–307.
25. Rhoda A, Laattoe N, Smithdorf G, Roman N, Frantz J. Facilitating community-based interprofessional education and collaborative practice in a health sciences faculty: Student perceptions and experiences. *Afr J Health Prof Educ* 2016; **8**(2): 225–8.
26. Hall LW, Zierler BK. Interprofessional Education and Practice Guide No. 1: Developing faculty to effectively facilitate interprofessional education. *J Interprof Care* 2015; **29**(1): 3–7.
27. Brewer ML. Facilitating the dissemination of interprofessional education and practice using an innovative conference approach to engage stakeholders. *J Interprof Educ Pract* 2016; **2**: 33–8.
28. Arndell C, Proffitt B, Disco M, Clithero A. Street outreach and shelter care elective for senior health professional students: An interprofessional educational model for addressing the needs of vulnerable populations. *Educ Health (Abingdon)* 2014; **27**(1): 99–102.
29. Ndateba I, Mtshali F, Mthembu SZ. Promotion of a primary healthcare philosophy in a community-based nursing education programme from the students' perspective. *Afr J Health Prof Educ* 2015; **7**(2): 190–3.
30. Jakobsen F, Hansen J. Spreading the concept: an attempt to translate an interprofessional clinical placement across a Danish hospital. *J Interprof Care* 2014; **28**(5): 407–12.
31. Pilon BA, Ketel C, Davidson HA, et al. Evidence-Guided Integration of Interprofessional Collaborative Practice into Nurse Managed Health Centers. *J Prof Nurs* 2015; **31**(4): 340–50.
32. Harada ND, Rajashekara S, Sansgiry S, et al. Developing Interprofessional Primary Care Teams: Alumni Evaluation of the Department of Veterans Affairs Centers of Excellence in Primary Care Education Program. *J Med Educ Curric Dev* 2019; **6**.
33. Joynes VCT. Defining and understanding the relationship between professional identity and interprofessional responsibility: implications for educating health and social care students. *Adv Health Sci Educ* 2018; **23**(1): 133–49.
34. Williams B, Webb V. A national study of paramedic and nursing students' readiness for interprofessional learning (IPL): Results from nine universities. *Nurse Educ Today* 2015; **35**(9): e31–e7.
35. Hayashi T, Shinozaki H, Makino T, et al. Changes in attitudes toward interprofessional health care teams and education in the first- and third-year undergraduate students. *J Interprof Care* 2012; **26**(2): 100–7.
36. Edwards SE, Platt S, Lenguerrand E, et al. Effective interprofessional simulation training for medical and midwifery students. *BMJ Simul Technol Enhanc Learn* 2015; **1**(3): 87–93.
37. Interprofessional Education Collaborative. (2016). Core competencies for interprofessional collaborative practice: 2016 update. Washington, DC: Interprofessional Education Collaborative, 2016.
38. Piette AE, Attoe C, Humphreys R, Cross S, Kowalski C. Interprofessional simulation training for community mental health teams: Findings from a mixed methods study. *J Interprof Care* 2018; **32**(6): 762–70.
39. Attoe C, Lavelle M, Sherwali S, Rimes K, Jabur Z. Student interprofessional mental health simulation (SIMHS): evaluating the impact on medical and nursing students, and clinical psychology trainees. *Journal of Mental Health Training Education and Practice* 2019; **14**(1): 46–58.
40. Koch S, Haggglund M. Mutual Learning and Exchange of Health Informatics Experiences from Around the World - Evaluation of a Massive Open Online Course in eHealth. In: Gundlapalli AV, Jaulent MC, Zhao D. (eds) *Medinfo 2017: Precision Healthcare through Informatics*; 2017: 753–7.
41. Martini ND, Webster CS. Evaluation of interprofessional learning among medical and pharmacy students using a virtual patient simulation. IEEE 6th International Conference on Serious Games and Applications for Health (SeGAH). Vienna, Austria, 2018. DOI:10.1109/SeGAH.2018.8401319.
42. Djukic M, Adams J, Fulmer T, et al. E-Learning with virtual teammates: A novel approach to interprofessional education. *J Interprof Care* 2015; **29**(5): 476–82.
43. Rock JA, Acuna JM, Lozano JM, et al. Impact of an Academic-Community Partnership in Medical Education on Community Health: Evaluation of a Novel Student-Based Home Visitation Program. *Southern Medical Journal* 2014; **107**(4): 203–11.
44. Bakshi S, James A, Hennelly MO, et al. The Human Rights and Social Justice Scholars Program: A Collaborative Model for Preclinical Training in Social Medicine. *Ann Glob Health* 2015; **81**(2): 290–7.
45. Michaud PA. Reforms of the pre-graduate curriculum for medical students: the Bologna process and beyond. *Swiss Med Wkly* 2012; **142**.
46. Pullon S., Darlow B., McKinlay E. Building Evaluation into the Development of Interprofessional Education Initiatives. In: Forman D, Jones M, Thistlethwaite J. (eds) *Leading Research and Evaluation in*

- Interprofessional Education and Collaborative Practice. Palgrave Macmillan, London, 2016: 145–66. DOI: [https://doi.org/10.1057/978-1-137-53744-7\\_8](https://doi.org/10.1057/978-1-137-53744-7_8)
47. Travers JL, Weis M, Merrill JA. Relationships Among DNP and PhD Students After Implementing a Doctoral Student Organization. *Nurs Educ Perspect* 2018; **39**(5): 271–9.
  48. Filho JRF, Magnago C, da Costa MV, Forster AC. Specialization courses offered in the scope of the more doctors program: Documentary analysis from the perspective of interprofessional education. *Interface: Communication, Health, Education* 2018; **22**: 1613–24.
  49. Gudmundsen AC, Norbye B, Dahlgren MA, Obstfelder A. Interprofessional student meetings in municipal health service-Mutual learning towards a Community of Practice in patient care. *J Interprof Care* 2019; **33**(1): 93–101.
  50. Axelsson M, Jakobsson J, Carlson E. Which nursing students are more ready for interprofessional learning? A cross-sectional study. *Nurse Educ Today* 2019; **79**: 117–23.
  51. Shilkofski N, Crichlow A, Rice J, et al. A standardized needs assessment tool to inform the curriculum development process for pediatric resuscitation simulation-based education in resources-limited setting. *Front Pediatr* 2018; **6**.
  52. Withers M, Lin HH, Schmidt T, Delos Trinos JPCR, Kumar S. Establishing competencies for a global health workforce: Recommendations from the association of pacific rim universities. *Ann Glob Health* 2019; **85**(1).
  53. Lutfiyya MN, Brandt B, Delaney C, Pechacek J, Cerra F. Setting a research agenda for interprofessional education and collaborative practice in the context of United States health system reform. *J Interprof Care* 2016; **30**(1): 7–14.
  54. Amuguni H, Bikaako W, Naigaga I, Bazeyo W. Building a framework for the design and implementation of One Health curricula in East and Central Africa: OHCEAs One Health Training Modules Development Process. *One Health* 2019; **7**.
  55. Busari J, Chan MK, Dath D, Matlow A, Meschino DC. Sanokondu: The birth of a multinational network for the development of healthcare leadership education. *Leadersh Health Serv (Bradf Engl)* 2018; **31**(2): 254–64.
  56. Effland KJ, Hays K. A web-based resource for promoting equity in midwifery education and training: Towards meaningful diversity and inclusion. *Midwifery* 2018; **61**: 70–3.
  57. Bac M, Bergh AM, Etsane ME, Hugo J. Medical education and the quality improvement spiral: A case study from Mpumalanga, South Africa. *Afr J Prim Health Care Fam Med* 2015; **7**(1).
  58. Hanson J, McAllister M. "Hearing students into speech": A critical exploration of nursing students' experiences of adversity. *Focus on Health Professional Education-a Multidisciplinary Journal* 2017; **18**(1): 42–55.
  59. Al-Eyd G, Achike F, Agarwal M, et al. Curriculum mapping as a tool to facilitate curriculum development: a new School of Medicine experience. *BMC Med Educ* 2018; **18**.
  60. Baverstock KA, Gargya DM, Jackson M, Stupans I. Identifying Future Health Professionals' Understanding of the Determinants of Health. *J Nurs Educ* 2018; **57**(12): 756–9.
  61. Ely LI, Toassi RFC. Integration among curricula in Health professionals' education: the power of interprofessional education in undergraduate courses. *Interface-Comunicacao Saude Educacao* 2018; **22**: 1563–75.
  62. Evans DP, Anderson M, Shahpar C, Del Rio C, Curran JW. Innovation in Graduate Education for Health Professionals in Humanitarian Emergencies. *Prehosp Disaster Med* 2016; **31**(5): 532–8.
  63. Gallagher P, Pullon S, Skinner M, McHugh P, McKinlay E, Gray L. An interprofessional community education project as a socially accountable assessment. *J Interprof Care* 2015; **29**(5): 509–11.
  64. Manabe YC, Campbell JD, Ovuga E, Maling S, Bollinger RC, Sewankambo N. Optimisation of the Medical Education Partnership Initiative to address African health-care challenges. *Lancet Glob Health* 2014; **2**(7): E392-E.
  65. Pinto HA, Andrezza R, Ribeiro RJ, Loula MR, Dos Reis AAC. The more doctors program and the changing role of the state in the regulation and organization of medical education. *Interface: Communication, Health, Education* 2019; **23**.
  66. Ten Cate O, Graafmans L, Posthumus I, Welink L, van Dijk M. The EPA-based Utrecht undergraduate clinical curriculum: Development and implementation. *Med Teach* 2018; **40**(5): 506–13.
  67. Hartley K. Untangling approaches to management and leadership across systems of medical education. *BMC Health Serv Res* 2016; **16**(2): 180.
  68. Rawal LB, Mahmud K, Islam SMS, Mahumud RA, Nuruzaman M, Ahmed SM. Training mid-level health cadres to improve health service delivery in rural Bangladesh. *Prim Health Care Res Dev* 2016; **17**(5): 503–13.
  69. Albarqouni L, Ellessi K. Awareness, attitudes and knowledge about evidence-based medicine among doctors in Gaza: A cross-sectional survey. *Eastern Mediterr Health J* 2017; **23**(9): 626–31.

70. Blouin D, Tekian A. Accreditation of medical education programs: Moving from student outcomes to continuous quality improvement measures. *Acad Med* 2018; **93**(3): 377–83.
71. Matlow A, Chan MK, Bohnen JD, et al. Collaborating internationally on physician leadership education: first steps. *Leadership in Health Serv (Bradf Engl)* 2016; **29**(3): 220–30.
72. Mazotti L, Adams J, Peyser B, Chretien K, Duffy B, Hirsh DA. Diffusion of innovation and longitudinal integrated clerkships: Results of the clerkship directors in internal medicine annual survey. *Med Teach* 2019; **41**(3): 347–53.
73. Blum N, Berlin A, Isaacs A, Burch WJ, Willott C. Medical students as global citizens: a qualitative study of medical students' views on global health teaching within the undergraduate medical curriculum. *BMC Med Educ* 2019; **19**.
74. Klein MD, Schumacher DJ, Sandel M. Assessing and managing the social determinants of health: Defining an entrustable professional activity to assess residents' ability to meet societal needs. *Acad Pediatr* 2014; **14**(1): 10–3.
75. Caverzagie KJ, Lane SW, Sharma N, et al. Proposed performance-based metrics for the future funding of graduate medical education: Starting the conversation. *Acad Med* 2018; **93**(7): 1002–13.
76. Kelly CM, Vins H, Spicer JO, et al. The rapid scale up of medical education in Ethiopia: Medical student experiences and the role of e-learning at Addis Ababa University. *PLoS One* 2019; **14**(9).
77. Street NW, Mandel L, Man L, Bermudez L. Human resources for health: Advancing nursing in Haiti — A qualitative evaluation of a master's level nursing faculty development project. *J Health Care Poor Underserved* 2019; **30**(1): 404–16.
78. Seymour B, Muhumuza I, Mumena C, Isyagi M, Barrow J, Meeks V. Including oral health training in a health system strengthening program in Rwanda. *Glob Health Action* 2013; **6**: 1–6.
79. Arora G, Condurache T, Batra M, et al. Miles Away Milestones: A Framework for Assessment of Pediatric Residents During Global Health Rotations. *Acad Pediatr* 2017; **17**(5): 577–9.
80. Knight SE, Ross AJ, Mahomed O. Developing primary health care and public health competencies in undergraduate medical students. *S Afr Fam Pract* 2017; **59**(3): 103–9.
81. Peluso MJ, van Schalkwyk S, Kellett A, et al. Reframing undergraduate medical education in global health: Rationale and key principles from the Bellagio Global Health Education Initiative. *Med Teach* 2017; **39**(6): 639–45.
82. Kutt A, Mayan M, Bienko I, Davies J, Bhatt H, Vohra S. AN UNDERGRADUATE COURSE COMBINING INTERPROFESSIONAL EDUCATION AND COMPLEMENTARY HEALTH APPROACHES LEARNING OBJECTIVES: SUCCESSFUL INTEGRATIVE LEARNING THAT IMPROVES INTEREST AND REDUCES REDUNDANCY. *Explore (NY)* 2019; **15**(4): 273–82.
83. Hoffman SJ, Silverberg SL. Training the next generation of global health advocates through experiential education: A mixed-methods case study evaluation. *Can J Public Health* 2015; **106**(6): E442–E9.
84. Kelly T, Lazenby M. Developing and validating learning domains, competencies, and evaluation items for global health clinical immersion practicums for graduate-level nursing programs. *J Adv Nurs* 2019; **75**(1): 234–52.
85. Fritze O, Lammerding-Koeppel M, Boeker M, et al. Boosting competence-orientation in undergraduate medical education - A web-based tool linking curricular mapping and visual analytics. *Med Teach* 2019; **41**(4): 422–32.
86. Berman P, Frenk J. The New Harvard Doctor of Public Health: Lessons From the Design and Implementation of an Innovative Program in Advanced Professional Leadership. *Public Health Rep* 2018; **133**(6): 759–66.
87. Englander R, Cameron T, Ballard AJ, Dodge J, Bull J, Aschenbrenner CA. Toward a Common Taxonomy of Competency Domains for the Health Professions and Competencies for Physicians. *Acad Med* 2013; **88**(8): 1088–94.
88. Pepin J, Goudreau J, Lavoie P, et al. A nursing education research framework for transformative learning and interdependence of academia and practice. *Nurse Educ Today* 2017; **52**: 50–2.
89. Berberat PO, Harendza S, Kadmon M. Entrustable professional activities - Visualization of competencies in postgraduate training. position paper of the committee on postgraduate medical training of the German Society for Medical Education (GMA). *GMS Z Med Ausbild* 2013; **30**(4).
90. DeSipio J, Phadtare S. An Interactive Session on Nutritional Pathologies for Health Professional Students. *Healthcare* 2015; **3**(3): 519–28.
91. Caverzagie KJ, Nousiainen MT, Ferguson PC, et al. Overarching challenges to the implementation of competency-based medical education. *Med Teach* 2017; **39**(6): 588–93.
92. Ivory K, Bandler L, Hawke C, Armstrong B. A clinical approach to population medicine. *Clin Teach* 2013; **10**(2): 94–8.

93. Glick M, da Silva OM, Seeberger GK, et al. FDI Vision 2020: shaping the future of oral health. *Int Dent J* 2012; **62**(6): 278–91.
94. Venturelli Garay RE, Watt RG. Review and analysis of Chilean dental undergraduate education: Curriculum composition and profiles of first year dental students. *Hum Resour Health* 2018; **16**(1).
95. Westein MPD, de Vries H, Floor A, Koster AS, Buurma H. Development of a Postgraduate Community Pharmacist Specialization Program Using CanMEDS Competencies, and Entrustable Professional Activities. *Am J Pharm Educ* 2019; **83**(6): 1354–65.
96. Zieck MRM, Um IS, Chaar BB. The future of weight management in pharmacy education – Perspectives of new generation pharmacists. *Curr Pharm Teach Learn* 2018; **10**(5): 596–601.
97. Seymour B, Shick E, Chaffee BW, Benzian H. Going global: Toward competency-based best practices for global health in dental education. *J Dent Educ* 2017; **81**(6): 707–15.
98. Williamson AE, Ayres R, Allen J, Macleod U. Core intended learning outcomes for tackling health inequalities in undergraduate medicine Curriculum development. *BMC Med Educ* 2015; **15**(1).
99. Shaye DA, Tollefson T, Shah I, et al. Backward Planning a Craniomaxillofacial Trauma Curriculum for the Surgical Workforce in Low-Resource Settings. *World J Surg* 2018; **42**(11): 3514–9.
100. Woolley T, Clithero-Eridon A, Elsanousi S, Othman AB. Does a socially-accountable curriculum transform health professional students into competent, work-ready graduates? A cross-sectional study of three medical schools across three countries. *Med Teach* 2019; **41**(12): 1427–33.
101. Fonn S. Linking public health training and health systems development in sub-Saharan Africa: Opportunities for improvement and collaboration. *J Public Health Policy* 2011; **32**: S44-S51.
102. Esplen MJ, Hunter J, Maheu C, et al. de Souza interprofessional practice cancer competency framework. *Support Care Cancer* 2019; **28**(2): 797–808.
103. Tomiak A, Braund H, Egan R, et al. Exploring How the New Entrustable Professional Activity Assessment Tools Affect the Quality of Feedback Given to Medical Oncology Residents. *J Cancer Educ* 2019; **35**(8): 1–13.
104. Weinstein AR, Dolce MC, Koster M, et al. Integration of systematic clinical interprofessional training in a student-faculty collaborative primary care practice. *J Interprof Care* 2018; **32**(1): 104–7.
105. Drago D, Shire S, Ekmekci O. Improving Regulatory Education: Can We Reconcile Employers' Expectations With Academic Offerings? *Ther Innov Regul Sci* 2016; **50**(3): 330–6.
106. Phlypo I, De Tobel J, Marks L, De Visschere L, Koole S. Integrating community service learning in undergraduate dental education: A controlled trial in a residential facility for people with intellectual disabilities. *Spec Care Dentistry* 2018; **38**(4): 201–7.
107. Naegle MA, Hanley K, Gourevitch MN, Tuchman E, More FG, Bereket S. Project SARET: An interprofessional education (IPE) lens examines substance use disorders research education for health professional students. *J Interprof Educ Pract* 2017; **9**: 99–103.
108. Bowe CM, Armstrong E. Assessment for Systems Learning: A Holistic Assessment Framework to Support Decision Making Across the Medical Education Continuum. *Acad Med* 2017; **92**(5): 585–92.
109. Attoe C, Lavelle M, Sherwali S, Rimes K, Jabur Z. Student interprofessional mental health simulation (SIMHS): evaluating the impact on medical and nursing students, and clinical psychology trainees. *Journal of Mental Health Training Education and Practice* 2019; **14**(1): 46–58. 10.1108/JMHTEP-06-2018-0037
110. Gopfert A, Mohamedbhai H, Mise J, et al. Do medical students want to learn about global health? *Glob Health Action* 2014; **7**: 1–6.
111. Irby DM, Hamstra SJ. Parting the Clouds: Three Professionalism Frameworks in Medical Education. *Acad Med* 2016; **91**(12): 1606–11.
112. Gostelow N, Barber J, Gishen F, Berlin A. Flipping social determinants on its head: Medical student perspectives on the flipped classroom and simulated patients to teach social determinants of health. *Med Teach* 2018; **40**(7): 728–35.
113. Simpson V, Richards E. Flipping the classroom to teach population health: Increasing the relevance. *Nurse Educ Pract* 2015; **15**(3): 162–7.
114. Dolce MC, Aghazadeh-Sanai N, Mohammed S, Fulmer TT. Integrating oral health into the interdisciplinary health sciences curriculum. *Dent Clin North Am* 2014; **58**(4): 829–43.
115. Komenda M, Karolyi M, Pokorná A, Vaitis C. Medical and Healthcare Curriculum Exploratory Analysis. *Stud Health Technol Inform* 2017; **235**: 231-5.
116. Taveira-Gomes T, Saffarzadeh A, Severo M, Guimaraes MJ, Ferreira MA. A novel collaborative e-learning platform for medical students - ALERT STUDENT. *BMC Med Educ* 2014; **14**: 143.



117. Gao XY, Yu RB, Shen HB, Chen Q. An Outline of a Proposed Five-Plus Three-Year Combined Undergraduate-Master's Degree for Clinical Medicine Majors at Nanjing Medical University. *Chinese Education and Society* 2014; **47**(3): 6–23.
118. Escher C, Creutzfeldt J, Meurling L, Hedman L, Kjellin A, Fellander-Tsai L. Medical students' situational motivation to participate in simulation based team training is predicted by attitudes to patient safety. *BMC Med Educ* 2017; **17**(1): 37.
119. Fernando A, Attoe C, Jaye P, Cross S, Pathan J, Wessely S. Improving Interprofessional Approaches to Physical and Psychiatric Comorbidities Through Simulation. *Clin Simul Nurs* 2017; **13**(4): 186–93.
120. Heldal I, Backlund P, Johannesson M, Lebram M, Lundberg L. Connecting the Links: Narratives, Simulations and Serious Games in Prehospital Training. *Stud Health Technol Inform* 2017; **235**: 343–7.
121. Tuti T, Winters N, Muinga N, Wanyama C, English M, Paton C. Evaluation of adaptive feedback in a smartphone-based serious game on health care providers' knowledge gain in neonatal emergency care: Protocol for a randomized controlled trial. *J Med Internet Res* 2019; **21**(7).
122. Yuksekdag BB. The importance of mobile augmented reality in online nursing education. In: Nursing Education, Administration, and Informatics: Breakthroughs in Research and Practice, 2018: 111–25. DOI: 10.4018/978-1-5225-5490-5.ch008
123. Pavlic D, Burns HH, Wong A, Lehmer J, Baek HC. An immersion program for clinical nurse leader students: Comparing health care systems in South Korea and the United States. *J Prof Nurs* 2019; **36**(2): 83–95.
124. Carlson K, Gagnon D. Augmented Reality Integrated Simulation Education in Health Care. *Clin Simul Nurs* 2016; **12**: 123–127.
125. Yang LY, Yang YY, Huang CC, et al. Simulation-based inter-professional education to improve attitudes towards collaborative practice: A prospective comparative pilot study in a Chinese medical centre. *BMJ Open* 2017; **7**(11).
126. Watt-Watson J, McGillion M, Lax L, et al. Evaluating an Innovative eLearning Pain Education Interprofessional Resource: A PrePost Study. *Pain Med* 2019; **20**(1): 37–49.
127. Battat R, Jhonson M, Wiseblatt L, et al. The Haiti Medical Education Project: development and analysis of a competency based continuing medical education course in Haiti through distance learning. *BMC Med Educ* 2016; **16**(1): 271.
128. Cabral VK, Valentini DF, Rocha MVV, De Almeida CPB, Cazella SC, Silva DR. Distance Learning Course for Healthcare Professionals: Continuing Education in Tuberculosis. *Telemed J E Health* 2017; **23**(12): 996–1001.
129. Nagengast ES, Ramos MS, Sarma H, et al. Surgical Education Through Video Broadcasting. *J Craniof Surg* 2014; **25**(5): 1619–21.
130. Patel D, Parsley S, Leck A. Open education in eye health: Transforming access to learning. *Community Eye Health* 2018; **30**(100): 96-8.
131. Ambrose M, Murray L, Handoyo NE, Tunggal D, Cooling N. Learning global health: a pilot study of an online collaborative intercultural peer group activity involving medical students in Australia and Indonesia. *BMC Med Educ* 2017; **17**.
132. Kent F, Courtney J, Thorpe J. Interprofessional education workshops in the workplace for pre-registration learners: Aligning to National Standards. *Nurse Educ Today* 2018; **62**: 58–61.
133. Hervatis V, Kyaw BM, Semwal M, et al. Offline and computer-based eLearning interventions for medical students' education. *Cochrane Database of Systematic Reviews* 2016; **2016**(4).
134. Pemba S, Macfarlane SB, Mpenbeni R, Goodell AJ, Kaaya EE. Tracking university graduates in the workforce: Information to improve education and health systems in Tanzania. *J Public Health Policy* 2012; **33**: S202-S15.
135. Berman NB, Durning SJ, Fischer MR, Huwendiek S, Triola MM. The Role for Virtual Patients in the Future of Medical Education. *Acad Med* 2016; **91**(9): 1217–22.
136. Ellaway RH, Davies D. Design for learning: deconstructing virtual patient activities. *Med Teach* 2011; **33**(4): 303–10.
137. Forsberg E, Georg C, Ziegert K, Fors U. Virtual patients for assessment of clinical reasoning in nursing - A pilot study. *Nurse Educ Today* 2011; **31**(8): 757–62.
138. Hoffman K, Dempsey J, Levett-Jones T, et al. The design and implementation of an Interactive Computerised Decision Support Framework (ICDSF) as a strategy to improve nursing students' clinical reasoning skills. *Nurse Educ Today* 2011; **31**(6): 587–94.
139. Liaw SY, Wong LF, Chan SWC, et al. Designing and Evaluating an Interactive Multimedia Web-Based Simulation for Developing Nurses' Competencies in Acute Nursing Care: Randomized Controlled Trial. *J Med Internet Re* 2015; **17**(1): e5.

140. Forsberg E, Ziegert K, Hult H, Fors U. Clinical reasoning in nursing, a think-aloud study using virtual patients - A base for an innovative assessment. *Nurse Educ Today* 2014; **34**(4): 538–42.
141. Cook NF, McAloon T, O'Neill P, Beggs R. Impact of a web based interactive simulation game (PULSE) on nursing students' experience and performance in life support training - A pilot study. *Nurse Educ Today* 2012; **32**(6): 714–20.
142. Ben Gal G, Weiss EI, Gafni N, Ziv A. Preliminary Assessment of Faculty and Student Perception of a Haptic Virtual Reality Simulator for Training Dental Manual Dexterity. *J Dent Educ* 2011; **75**(4): 496–504.
143. de Boer IR, Wesselink PR, Vervooorn JM. The creation of virtual teeth with and without tooth pathology for a virtual learning environment in dental education. *Eur J Dent Educ* 2013; **17**(4): 191–7.
144. Aboshady OA, Radwan AE, Eltaweel AR, et al. Perception and use of massive open online courses among medical students in a developing country: multicentre cross-sectional study. *BMJ Open* 2015; **5**(1).
145. Hsu LL. Blended learning in ethics education: A survey of nursing students. *Nurs Ethics* 2011; **18**(3): 418–30.
146. Rigby L, Wilson I, Baker J, et al. The development and evaluation of a 'blended' enquiry based learning model for mental health nursing students: "making your experience count". *Nurse Educ Today* 2012; **32**(3): 303–8.
147. Lapkin S, Levett-Jones T, Gilligan C. A cross-sectional survey examining the extent to which interprofessional education is used to teach nursing, pharmacy and medical students in Australian and New Zealand Universities. *J Interprof Care* 2012; **26**(5): 390–6.
148. Riesen E, Morley M, Clendinneng D, Ogilvie S, Murray MA. Improving interprofessional competence in undergraduate students using a novel blended learning approach. *J Interprof Care* 2012; **26**(4): 312–8.
149. Barnett S, Jones SC, Caton T, Iverson D, Bennett S, Robinson L. Implementing a Virtual Community of Practice for Family Physician Training: A Mixed-Methods Case Study. *J Med Internet Res* 2014; **16**(3): 238–50.
150. Pimmer C, Brysiewicz P, Linxen S, Walters F, Chipps J, Grohbiel U. Informal mobile learning in nurse education and practice in remote areas-A case study from rural South Africa. *Nurse Educ Today* 2014; **34**(11): 1398–404.
151. Mikrogianakis A, Kam A, Silver S, et al. Telesimulation: An Innovative and Effective Tool for Teaching Novel Intraosseous Insertion Techniques in Developing Countries. *Acad Emerg Med* 2011; **18**(4): 420–7.
152. Gilligan C, Outram S, Levett-Jones T. Recommendations from recent graduates in medicine, nursing and pharmacy on improving interprofessional education in university programs: a qualitative study. *BMC Med Educ* 2014; **14**: 52.
153. Schmitt MH, Gilbert JHV, Brandt BF, Weinstein RS. The Coming of Age for Interprofessional Education and Practice. *Am J Med* 2013; **126**(4): 284–8.
154. Brewer ML, Stewart-Wynne EG. An Australian hospital-based student training ward delivering safe, client-centred care while developing students' interprofessional practice capabilities. *J Interprof Care* 2013; **27**(6): 482–8.
155. Hallin K, Henriksson P, Dalen N, Kiessling A. Effects of interprofessional education on patient perceived quality of care. *Med Teach* 2011; **33**(1): E22-E6.
156. Archibald D, Trumpower D, MacDonald CJ. Validation of the interprofessional collaborative competency attainment survey (ICCAS). *J Interprof Care* 2014; **28**(6): 553–8.
157. van Schaik SM, Plant J, Diane S, Tsang L, O'Sullivan P. Interprofessional Team Training in Pediatric Resuscitation: A Low-Cost, In Situ Simulation Program That Enhances Self-Efficacy Among Participants. *Clin Pediatr* 2011; **50**(9): 807–15.
158. Lingard L, McDougall A, Levstik M, Chandok N, Spafford MM, Schryer C. Representing complexity well: a story about teamwork, with implications for how we teach collaboration. *Med Educ* 2012; **46**(9): 869–77.
159. Paige JT, Garbee DD, Kozmenko V, et al. Getting a Head Start: High-Fidelity, Simulation-Based Operating Room Team Training of Interprofessional Students. *J Am Coll Surg* 2014; **218**(1): 140–9.
160. Tofil NM, Morris JL, Peterson DT, et al. Interprofessional simulation training improves knowledge and teamwork in nursing and medical students during internal medicine clerkship. *J Hosp Med* 2014; **9**(3): 189–92.
161. Wamsley M, Staves J, Kroon L, et al. The impact of an interprofessional standardized patient exercise on attitudes toward working in interprofessional teams. *J Interprof Care* 2012; **26**(1): 28–35.
162. Boet S, Bould MD, Sharma B, et al. Within-Team Debriefing Versus Instructor-Led Debriefing for Simulation-Based Education A Randomized Controlled Trial. *Ann Surg* 2013; **258**(1): 53–8.
163. Boet S, Bould MD, Burn CL, Reeves S. Twelve tips for a successful interprofessional team-based high-fidelity simulation education session. *Med Teach* 2014; **36**(10): 853–7.

164. Ellman MS, Schulman-Green D, Blatt L, et al. Using Online Learning and Interactive Simulation To Teach Spiritual and Cultural Aspects of Palliative Care to Interprofessional Students. *J Palliat Med* 2012; **15**(11): 1240–7.
165. Katzman JG, Comerci G, Boyle JF, et al. Innovative Telementoring for Pain Management: Project ECHO Pain. *J Contin Educ Health Prof* 2014; **34**(1): 68–75.
166. Khalili H, Orchard C, Laschinger HKS, Farah R. An interprofessional socialization framework for developing an interprofessional identity among health professions students. *J Interprof Care* 2013; **27**(6): 448–53.
167. Dornan T, Tan N, Boshuizen H, et al. How and what do medical students learn in clerkships? Experience based learning (ExBL). *Adv Health Sci Educ* 2014; **19**(5): 721–49.
168. Walters L, Prideaux D, Worley P, Greenhill J. Demonstrating the value of longitudinal integrated placements to general practice preceptors. *Med Educ* 2011; **45**(5): 455–63.
169. Hean S, Craddock D, Hammick M, Hammick M. Theoretical insights into interprofessional education: AMEE Guide No. 62. *Med Teach* 2012; **34**(2): E78–E101.
170. DiMaria-Ghalili RA, Mirtallo JM, Tobin BW, Hark L, Van Horn L, Palmer CA. Challenges and opportunities for nutrition education and training in the health care professions: intraprofessional and interprofessional call to action. *Am J Clin Nutr* 2014; **99**(5): 1184S–93S.
171. Ogino S, King EE, Beck AH, Sherman ME, Milner DA, Giovannucci E. Interdisciplinary Education to Integrate Pathology and Epidemiology: Towards Molecular and Population-Level Health Science. *Am J Epidemiol* 2012; **176**(8): 659–67.
172. Fernandez GL, Page DW, Coe NP, et al. Boot Camp: Educational Outcomes After 4 Successive Years of Preparatory Simulation-Based Training at Onset of Internship. *J Surg Educ* 2012; **69**(2): 242–8.
173. Fishman SM, Young HM, Arwood EL, et al. Core Competencies for Pain Management: Results of an Interprofessional Consensus Summit. *Pain Med* 2013; **14**(7): 971–81.
174. Ateah CA, Snow W, Wener P, et al. Stereotyping as a barrier to collaboration: Does interprofessional education make a difference? *Nurse Educ Today* 2011; **31**(2): 208–13.
175. Legare F, Moumjid-Ferdjaoui N, Drolet R, et al. Core Competencies for Shared Decision Making Training Programs: Insights From an International, Interdisciplinary Working Group. *J Cont Educ Health Prof* 2013; **33**(4): 267–73.
176. Fernandez N, Dory V, Ste-Marie LG, Chaput M, Charlin B, Boucher A. Varying conceptions of competence: an analysis of how health sciences educators define competence. *Med Educ* 2012; **46**(4): 357–65.
177. Wilson L, Harper DC, Tami-Maury I, et al. GLOBAL HEALTH COMPETENCIES FOR NURSES IN THE AMERICAS. *J Prof Nurs* 2012; **28**(4): 213
178. Melby MK, Loh LC, Evert J, Prater C, Lin H, Khan OA. Beyond Medical "Missions" to Impact-Driven Short-Term Experiences in Global Health (STEGHs): Ethical Principles to Optimize Community Benefit and Learner Experience. *Acad Med* 2016; **91**(5): 633–8.
179. Lipner RS, Hess BJ, Phillips RL. Specialty Board Certification in the United States: Issues and Evidence. *J Cont Educ Health Prof* 2013; **33**: S20–S35.
180. Lockyer J, Carraccio C, Chan MK, et al. Core principles of assessment in competency-based medical education. *Med Teach* 2017; **39**(6): 609–16.
181. Chen HC, van den Broek WES, ten Cate O. The Case for Use of Entrustable Professional Activities in Undergraduate Medical Education. *Acad Med* 2015; **90**(4): 431–6.
182. O'Connor PG, Nyquist JG, McLellan AT. Integrating Addiction Medicine Into Graduate Medical Education in Primary Care: The Time Has Come. *Ann Intern Med* 2011; **154**(1): 56–9.
183. Hauer KE, ten Cate O, Boscardin C, Irby DM, Iobst W, O'Sullivan PS. Understanding trust as an essential element of trainee supervision and learning in the workplace. *Adv Health Sci Educ* 2014; **19**(3): 435–56.
184. ten Cate O, Hart D, Ankel F, et al. Entrustment Decision Making in Clinical Training. *Acad Med* 2016; **91**(2): 191–8.
185. Reeves S, Perrier L, Goldman J, Freeth D, Zwarenstein M. Interprofessional education: effects on professional practice and healthcare outcomes (update). *Cochrane Database Syst Rev* 2013; (3): CD002213.
186. Zorek J, Raehl C. Interprofessional education accreditation standards in the USA: A comparative analysis. *J Interprof Care* 2013; **27**(2): 123–30.
187. Hrynchak P, Batty H. The educational theory basis of team-based learning. *Med Teach* 2012; **34**(10): 796–801.
188. Manogue M, McLoughlin J, Christersson C, et al. Curriculum structure, content, learning and assessment in European undergraduate dental education - update 2010. *Eur J Dent Educ* 2011; **15**(3): 133–41.
189. Srinivasan M, Li STT, Meyers FJ, et al. "Teaching as a Competency": Competencies for Medical Educators. *Acad Med* 2011; **86**(10): 1211–20.

190. Bok HGJ, Teunissen PW, Favier RP, et al. Programmatic assessment of competency- based workplace learning: when theory meets practice. *BMC Med Educ* 2013; **13**: 123.
191. Patricio MF, Juliao M, Fareleira F, Carneiro AV. Is the OSCE a feasible tool to assess competencies in undergraduate medical education? *Med Teach* 2013; **35**(6): 503–14.
192. Hauer KE, Hirsh D, Ma I, et al. The role of role: learning in longitudinal integrated and traditional block clerkships. *Med Educ* 2012; **46**(7): 698–710.
193. Rekman J, Gofton W, Dudek N, Gofton T, Hamstra SJ. Entrustability Scales: Outlining Their Usefulness for Competency-Based Clinical Assessment. *Acad Med* 2016; **91**(2): 186–90.
194. Passi V, Johnson S, Peile E, Wright S, Hafferty F, Johnson N. Doctor role modelling in medical education: BEME Guide No. 27. *Med Teach* 2013; **35**(9): E1422–E1436.

### **Annex 3: Examples from Literature Review Prior to COVID-19**

We provide details of specific examples from the review of the literature prior to COVID-19 that is summarized in Table 3 of the article.

#### **Competency-Based Education**

##### ***The Association of Pacific Rim Universities Global Health Program***

Health professional education is being pushed to adapt to an increasingly interdependent world and rapid transformations in global context. The need for global health curricular content and standard global health training is increasingly recognized. The field has experienced a proliferation of global health education, training programs, and international collaborations. Despite the growing interest, there has been lack of coordination and consensus across health professional programs within and across countries regarding the core global health competencies and teaching methods. Recently, the Pacific Rim Universities (APRU) Global Health Program (GHP) has tried to address this gap.

The GHP is coordinated by the APRU and the University of Southern California (USC) Institute on Inequalities and Global Health. APRU, founded by USC in 1997, is an international, non-profit consortium of 50 research universities in the Pacific Rim “representing 16 economies, 120,000 faculty members and approximately two million students.”<sup>1</sup> The GHP was launched in 2007 and provides its members with collaborative activities in research, education, policy, and training around key global health issues. The program holds annual conferences with opportunities to initiate research collaborations, share scientific publication, attend trainings, and learn how to provide educational and practicum opportunities for students.<sup>2</sup>

Faced with the need to identify and share guidance on how competency-based education and training in global health can be implemented and supported across institutions with varying resources, the GHP has developed a core set of global health competencies for master-level global health education. After convening an international and multidisciplinary group of thirty stakeholders including faculty, university administrators, students and non-governmental organization workers representing 11 economies, the group identified 19 competencies categorized across five domains and developed a plan for how academic institutions can ensure these competencies are effectively taught.

Global health is interdisciplinary and requires that workers are able to respond to diverse and rapidly changing population needs and emerging global health issues. Therefore “standardizing the minimum requirements for competency in global health across institutions and nations can ensure adequate training of future health global leaders, no matter where they work.”<sup>1</sup>

#### **Interprofessional Education**

##### ***University of Virginia Center for Interprofessional Collaborations***

The University of Virginia Center for Academic Strategic Partnership for Interprofessional Research and Education (UVA Center for ASPIRE) was established in 2013 by the UVA Schools of Nursing and Medicine seeking to bridge the gap between medical and nursing education and prepare all students and clinicians to engage in teamwork and improve health outcomes. In 2019 the center was renamed the University of Virginia Center for Interprofessional Collaborations (CIPC). The center has advanced interprofessional training at undergraduate, graduate, clinical and faculty development levels by integrating IPE into the existing clinical curricula, allowing for “adequate mentorship, faculty development, coordination of activities to meet IPE competencies and appropriate assessment and learner outcomes.”<sup>3</sup>

Most recently, the faculty at the UVA CIPC created the UVA ASPIRE model. This new paradigm is intended for use by faculty and clinician educators to design, implement, assess, and evaluate interprofessional education (IPE) and interprofessional collaborative practice (ICP) experiences. It was created by embedding the Interprofessional Education Collaborative (IPEC) core competencies into three overlapping curricular content areas: practical tools, leadership training and relational factors.<sup>4</sup>

The Center is one of four national sites to host the Train-the-Trainer Interprofessional Faculty Development Program (T3-IFDP), an immersive leadership training program from the National Center for Interprofessional Practice and Education (NCIPE). The program prepares interprofessional teams of faculty and clinicians from across the country to work together to develop IPE initiatives at their own institutions at the undergraduate, graduate, faculty, or clinician level.

### **Information Technology-facilitated Education**

#### ***Distance Learning and Continuing Professional Development (CPD)***

##### Haiti Medical Education (HME) Project<sup>5-7</sup>

Between 2011 and 2013 this competency-based continuing medical education (CME) curriculum was developed for physicians in rural Haiti based on the premise of distance learning. Videoconferencing technology was used to connect international experts with rural primary care clinical sites in Haiti, where lectures were delivered to Haitian physicians in real-time. Competency guidelines from the American Academy of Family Physicians (AAFP) and College of Family Physicians Canada (CFPC) were adapted to develop a curriculum. These guidelines were reviewed by both Haitian and North American practitioners to reflect the local needs.

#### ***E-learning and Simulation***

##### Augmented Reality Integrated Simulation Education (ARISE)<sup>8</sup>

This project was conducted by Carlson & Gagnon in 2016 to merge the idea of simulation, augmented reality (AR), and game-based situated learning theory for nursing students. Augmented reality is “an enhanced version of reality created with the use of technology.” The authors found that students improved learning and critical thinking through the “authentic, engaging experience.”<sup>9</sup> It is a new mobile technology that has transitioned from computers to mobile devices and are “more successful than regular desktop learning activities. This application of technology is convenient as it could accommodate nurses whose workplaces encourage them to return to school to obtain higher degrees.

The ARISE platform was developed by David Gagnon from the University of Wisconsin and can be used with iPads and iPhones.<sup>10</sup>

#### ***Collaborative Connectivity***

##### E-learning with virtual team-mates for IPE: NYU3T curriculum<sup>11</sup>

When compared to a blended-learning IPE program, virtual IPE programs using virtual teammates were evaluated to be superior in terms of scalability, sustainability, faculty training, workload, and student scheduling. Findings such as this resulted in the development of an innovative interprofessional education curriculum model co-located at the NYU Grossman School of Medicine and the NYU Rory Meyers College of Nursing. The curriculum constitutes web-based learning modules, virtual patients, optional mannequin-based interprofessional simulation, and clinical crossover.

#### ***TeleSimulation***

During the global pandemic in 2020, the NYU Grossman Schools of Medicine developed a TeleSimulation learning platform which is “a new remote simulation modality using web conferencing technology, coupled with Laerdal mannequin vital signs software.”<sup>12</sup> The learners and instructors participate in these simulation activities from remote locations via Zoom.

## References

1. Withers M, Lin HH, Schmidt T, Delos Trinos JPCR, Kumar S. Establishing competencies for a global health workforce: Recommendations from the association of pacific rim universities. *Ann Glob Health* 2019; **85**(1).
2. Global Health Program. Association of Pacific Rim Universities. <https://apruglobalhealth.org/about/> (accessed on September 12, 2021).
3. Brashers V, Owen J, Haizlip J. Interprofessional Education and Practice Guide No. 2: Developing and implementing a center for interprofessional education. *J Interprof Care* 2015; **29**(2): 95–9.
4. Brashers V, Haizlip J, Owens JA. The ASPIRE Model: Grounding the IPEC core competencies for interprofessional collaborative practice within a foundational framework. *Journal of Interprofessional Care* 2019; **34**(1): 128-32.
5. Battat R, Jhonson M, Wiseblatt L, et al. The Haiti Medical Education Project: development and analysis of a competency based continuing medical education course in Haiti through distance learning. *BMC Med Educ* 2016; **16**(1): 275.
6. Haiti Medical Education Project. <https://www.hmeproject.org/> (accessed on September 12, 2021).
7. Vidyo. <https://www.vidyo.com/customers/education/haiti-medical-education-project> (accessed on September 12, 2022).
8. Carlson K, Gagnon D. Augmented reality integrated simulation education in health care. *Clin Simul Nurs* 2016; **12**: 123–27.
9. Augmented Reality Healthcare Scenarios. <https://support.skillscommons.org/showcases/open-courseware/healthcare/augment-reality/#:~:text=Augmented%20Reality%20Integrated%20Simulation%20Education%20%28ARISE%29%20scenarios%20merge,more%20authentic%20and%20immersive%20learning%20experience%20for%20p,articipants> (accessed on September 12, 2021).
10. ARISE Scenario Project. <https://www.skillscommons.org/bitstream/handle/taaccct/12981/Introduction.pdf?sequence=1&isAllowed=y> (accessed on September 12, 2021).
11. NYU3T: Teaching, Technology, Teamwork. <https://med.nyu.edu/departments-institutes/innovations-medical-education/research-scholarship/grants/nyu3t> (accessed on September 12, 2021).
12. NYSIM. <http://www.nysimcenter.org/content/telesimulation> (accessed on September 12, 2021).

## **Annex 4: The Impact of COVID-19 on IT-Facilitated Learning Across Health Professions Education Worldwide (2020) Survey**

### **Objective**

In the context of a global emergency, the aim of this study was to understand the technological applications that have been implemented as a result of the pandemic to facilitate the immediate transfer of instruction online to support remote learning. This research used a brief online survey tool to collect relevant de-identified information from Deans and/ Executive Deans of medical and nursing education institutions worldwide. The research was IRB approved (ID:20201163) – the IRB approval letter can be found on page 45 of this annex.

### **Methodology**

#### **Inclusion/Exclusion Criteria**

*Inclusion Criteria:* Participants included Deans and/ Program Directors of presently accredited medical and nursing schools worldwide (US, Canada, and internationally).

*Exclusion Criteria:* Deans and/ Program Directors of medical and nursing institutions that lack accreditation.

*Age Range:* N/A

#### **Research design**

*Recruitment/Sampling.* Due to the nature of this study and the differences in availability of comprehensive lists of medical and nursing schools for the target geographical regions, two different approaches were used for recruiting and sampling participants in the United States, Canada and internationally.

- a. For the United States and Canada, a systematic random sampling of member schools listed in the American Association of Medical Colleges (AAMC),<sup>1</sup> the Canadian Association of School of Nursing (CASN),<sup>2</sup> and the American Association of Colleges of Nursing (AACN)<sup>3</sup> was conducted. Up to 95 medical and nursing schools Deans US and Canada were contacted for this study.
- b. For other international regions, non-probability convenience or snowball sampling was utilized for participant recruitment and sampling. Recruitment was conducted by contacting key persons in respective countries/regions via email to request assistance with disseminating the survey to relevant individuals (Deans of medical and nursing schools). Because a convenience or snowball sampling technique was used for other international regions, a sample size was not able to be anticipated.

#### **Sample**

The target respondents were Deans/Executive Deans of medical and/ nursing education institutions in the following regions: United States, Canada, Asia (specifically, China, and the Association of Southeast Asian Nations), Europe (Spain, Sweden, and England), Africa (Tanzania, Kenya, and Uganda), and Latin America and the Caribbean (Mexico, Brazil, and Costa Rica).

#### **Measurement/Instrumentation**

A survey was designed and administered using REDCap. It was anticipated to take the respondents approximately 10 minutes to complete the online survey. The variables being measured in this survey included general information about the participating health profession institution, new strategies due to the pandemic, practical experiences, and attitudes/perceptions about sustainability. These variables were retrieved from a review of relevant literature both citing and not citing the 2010 Lancet report of health professions education worldwide as well as input from the previous commissioners.

The informed consent was presented to participants at the beginning of the online survey. Participants were informed that if they chose to complete the survey, they had automatically indicated they have read the consent and agreed to participate. Otherwise, participants had the option not to complete the survey. There were no risks to the respondents. This was a multisite study where the Research Team gathered de-identified information and all electronic data was stored in computer files that were password protected. Only people who were directly involved



with the project had access to those records. Participants did not receive any compensation for participating in this research study.

### **Detailed study procedures**

*Recruitment.* For the United States and Canada, a systematic random sampling of member schools listed in the American Association of Medical Colleges (AAMC), the Canadian Association of School of Nursing (CASN), and the American Association of Colleges of Nursing (AACN) was conducted. The email addresses of respective Deans and/ their administrative assistants were identified using the school's website and/ Planning group members' input. Up to 95 Deans were contacted.

#### *Sampling.*

- For U.S. medical school selection from AAMC database: Started at 5<sup>th</sup> position in the list and selected every 5<sup>th</sup> school until 30 schools selected in total.
- For Canadian medical school selection from AAMC database: Started at 2<sup>nd</sup> position and selected every 3<sup>rd</sup> school until the end of the list was reached.
- For Canadian nursing school selection from CASN: Started at 2<sup>nd</sup> position in the list and selected every 3<sup>rd</sup> school until 30 schools were selected or list ended.
- For U.S. nursing school selection from AACN: Started at 5<sup>th</sup> position in the list and selected every 5<sup>th</sup> school until 30 schools selected in total.

For other international regions, convenience or snowball sampling was utilized for participant recruitment and sampling as aforementioned in "Research design."

*Data collection.* For international participants, excluding Canada, a predetermined email, survey link, and all pertinent material were shared with that community liaisons who have explicitly agreed to assist with dissemination via email. For participants in North America, the survey link was shared via Deans' or administrative assistants' email. The data collection period took approximately 2 months.

### **Internal validity**

Since community liaisons with influence or access to Deans in particular countries within a geographic region were contacted for assistance with survey dissemination, the international findings were skewed. The sampled regions were not representative of all medical and nursing schools worldwide. Additionally, differing sampling methods for North America versus other international regions were used, therefore, comparisons cannot be made between the North American sampling frame and the international ones.

### **Data analysis**

Descriptive statistics were reported for discrete variables and inferential statistics for continuous items.

**IRB Approval Letter:**

**UNIVERSITY  
OF MIAMI**

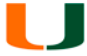

University of Miami  
Human Subject Research Office (M809)  
1400 NW 10th Avenue, Suite 1200A  
Miami, FL 33136

Ph.: 305-243-3195  
Fax: 305-243-3328  
www.hsro.med.miami.edu

**APPROVAL**

November 23, 2020

Roderick King  
305-243-2906  
r.king@med.miami.edu

On 11/23/2020, the IRB reviewed the following submission:

|                     |                                                                                                              |
|---------------------|--------------------------------------------------------------------------------------------------------------|
| Type of Review:     | Modification / Update                                                                                        |
| Title of Study:     | Ten years after the Lancet Commission on Health Professional Education(HPE): COVID-19 Pandemic               |
| Investigator:       | Roderick King                                                                                                |
| IRB ID:             | 20201163 (MOD00042854)                                                                                       |
| Funding:            | None                                                                                                         |
| IND, IDE, or HDE:   | None                                                                                                         |
| Documents Reviewed: | •Online Survey Consent_Oct 15 (1).docx<br>•Survey Instrument Measures Impact of COVID19_Modified Nov 17.docx |

The IRB determined this study meets the criteria for an exemption as described in Federal Regulation 45 CFR 46.104. This determination is effective on 11/23/2020.

*NOTE: Translations of IRB approved study documents, including informed consent documents, into languages other than English must be submitted to HSRO for approval prior to use.*

In conducting this study, you are required to follow the requirements listed in the [Investigator Manual \(HRP-103\)](#).

**If you plan to conduct this study at JHS, or obtain private, identifiable information from JHS, before conducting any research procedures at JHS, you must:**

- **Indicate this intention on the Initial Review Smart Form;**
- **Submit an application to JHS; and**
- **Receive an approval letter from the JHS Clinical Research Review Committee (CRRC).**

**If you have any questions regarding this process, please contact the JHS Office of Research at 305-585-7226.**

Should you have any questions, please contact: Adriana Robledo, IRB Regulatory Analyst, (phone: 305-243-7135; email: [arobledo@med.miami.edu](mailto:arobledo@med.miami.edu))

## References

1. AAMC. AAMC Medical School Members. <https://members.aamc.org/eweb/DynamicPage.aspx?site=AAMC&webcode=AAMCOrgSearchResult&orgtype=Medical%20School> (accessed October 20, 2021).
2. CASN. Accredited Canadian Nursing Education Programs. [https://www.casn.ca/wp-content/uploads/2018/03/2018-19-Season\\_Winter\\_ENG-FR\\_Accredited-Canadian-Nursing-Education-Programs.pdf](https://www.casn.ca/wp-content/uploads/2018/03/2018-19-Season_Winter_ENG-FR_Accredited-Canadian-Nursing-Education-Programs.pdf) (accessed October 20, 2021).
3. AACN. AACN Member Program Directory. <https://www.aacnnursing.org/Membership/Member-Program-Directory> (accessed October 20, 2021).

## Annex 5: A Comprehensive List of Literature Review About the Effects of COVID-19 Pandemic on Health Education and Practice

1. Donroe JH, Rabin TL, Hsieh E, Schwartz JI. A Broader View of Risk to Health Care Workers: Perspectives on Supporting Vulnerable Health Care Professional Households During COVID-19. *Acad Med* 2021; **96**: 1233–5.
2. Dykstra MP, Baitchman EJ. A Call for One Health in Medical Education: How the COVID-19 Pandemic Underscores the Need to Integrate Human, Animal, and Environmental Health. *Acad Med* 2021; **96**: 951–3.
3. Nix K, Liu EL, Oh L, *et al.* A Distance-Learning Approach to Point-of-Care Ultrasound Training (ADAPT): A Multi-Institutional Educational Response During the COVID-19 Pandemic. *Acad Med* 2021; **96**: 1711–6.
4. Burk-Rafel J, Standiford TC. A Novel Ticket System for Capping Residency Interview Numbers: Reimagining Interviews in the COVID-19 Era. *Acad Med* 2021; **96**: 50–5.
5. Aron JA, Bulteel AJB, Clayman KA, *et al.* A Role for Telemedicine in Medical Education During the COVID-19 Pandemic. *Acad Med* 2020; **95**: e4.
6. Jalilian Khave L, Vahidi M, Hasanzadeh T, Arab-Ahmadi M, Karamouzian M. A Student-Led Medical Education Initiative in Iran: Responding to COVID-19 in a Resource-Limited Setting. *Acad Med* 2021; **96**: e2.
7. Roberts LW. Academic Medicine in the Time of COVID-19. *Acad Med* 2020; **95**: 1123–4.
8. Lessing JN, Anderson LR, Mark NM, Maggio LA, Durning SJ. Academics in Absentia: An Opportunity to Rethink Conferences in the Age of Coronavirus Cancellations. *Acad Med* 2020; **95**: 1834–7.
9. Flotte TR, Larkin AC, Fischer MA, *et al.* Accelerated Graduation and the Deployment of New Physicians During the COVID-19 Pandemic. *Acad Med* 2020; **95**: 1492–4.
10. Kulasegaram K, Baxan V, Giannone E, Latter D, Hanson MD. Adapting the Admissions Interview During COVID-19: A Comparison of In-Person and Video-Based Interview Validity Evidence. *Acad Med* 2022; **97**: 200–6.
11. Posever N, Sehdev M, Sylla M, Mashar R, Mashar M, Abioye A. Addressing Equity in Global Medical Education During the COVID-19 Pandemic: The Global Medical Education Collaborative. *Acad Med* 2021; **96**: 1574–9.
12. Rose CC, Haas MRC, Yilmaz Y, *et al.* ALiEM Connect: Large-Scale, Interactive, Virtual Residency Programming in Response to COVID-19. *Acad Med* 2021; **96**: 1419–24.
13. Sayyed A, Baker ML, Peesay T, Rooney A, Syed Z. An Auxiliary Medical Education: The Evolution of a Medical Student-Founded Organization in Response to the COVID-19 Era Personal Protective Equipment Shortage. *Acad Med* 2021; **96**: 1663–70.
14. Hahn-Schroeder H, Honig J, Smith C, Chin S, Frazier L. An Innovative Academic Practice Model for Clinical Nursing Education During the COVID-19 Pandemic. *Acad Med* 2022; **97**: S19.
15. Pearson S. Anatomy: Beyond the COVID-19 Pandemic. *Acad Med* 2020; **95**: e1.
16. Roll R, Chiu M, Huang C. Answering the Call to Action: COVID-19 Curriculum Design by Students for Students. *Acad Med* 2020; **95**: e6.
17. Golden SH, Galiatsatos P, Wilson C, *et al.* Approaching the COVID-19 Pandemic Response With a Health Equity Lens: A Framework for Academic Health Systems. *Acad Med* 2021; **96**: 1546–52.
18. Ripp J, Peccoraro L, Charney D. Attending to the Emotional Well-Being of the Health Care Workforce in a New York City Health System During the COVID-19 Pandemic. *Acad Med* 2020; **95**: 1136–9.
19. Marbin J, Hutchinson Y-V, Schaeffer S. Avoiding the Virtual Pitfall: Identifying and Mitigating Biases in Graduate Medical Education Videoconference Interviews. *Acad Med* 2021; **96**: 1120–4.
20. Kwaning KM. Being Black in Medicine in the Midst of COVID-19 and Police Violence. *Acad Med* 2020; **95**: 1787–8.
21. Goel RR, Kavanagh NM. Beyond Structural Competency: Why Politics Should Be Taught During Medical Education. *Acad Med* 2020; **95**: e10.
22. Berg LJ, Arons D, Deng J, *et al.* Cardiac Coaches: A Student-Led Inpatient Cardiac Rehabilitation Program in the COVID-19 Era. *Acad Med* 2021; **96**: e24.
23. Lim Y, Chook S, Low T-T, Yeo WT, Tay E. Cardiology Training in Singapore During the COVID-19 Pandemic. *Acad Med* 2020; **95**: e2.

24. Gettel CJ, Venkatesh AK. Career Development Considerations for Academic Physician Mentees and Mentors in the Time of COVID-19: Jump in or Just Dip a Toe? *Acad Med* 2021; **96**: 974–8.
25. Franke J, Bliamptis J, Alon L. Certify Medical Students to Respond to National Crises. *Acad Med* 2021; **96**: e5.
26. Wateridge MJ, Chapman LC. Clinical Support and Practice: U.K. Medical Students as Clinical Support Workers During COVID-19. *Acad Med* 2021; **96**: e24.
27. Ryan MS, Holmboe ES, Chandra S. Competency-Based Medical Education: Considering Its Past, Present, and a Post-COVID-19 Era. *Acad Med* 2022; **97**: S90.
28. Long N, Wolpaw DR, Boothe D, *et al.* Contributions of Health Professions Students to Health System Needs During the COVID-19 Pandemic: Potential Strategies and Process for U.S. Medical Schools. *Acad Med* 2020; **95**: 1679–86.
29. Chandler L. Conversation With Death. *Acad Med* 2021; **96**: 1684.
30. Scarcella J. Courage in the Face of COVID-19. *Acad Med* 2020; **95**: e12.
31. Lucio F. COVID-19 and Latinx Disparities: Highlighting the Need for Medical Schools to Consider Accepting DACA Recipients. *Acad Med* 2022. DOI:[10.1097/ACM.0000000000004576](https://doi.org/10.1097/ACM.0000000000004576).
32. Sarma S, Usmani S. COVID-19 and Physician Mothers. *Acad Med* 2021; **96**: e12.
33. Blum JR, Feuerbach AM, Fox JA, Rook JM. COVID-19 and Public Policy Imperatives: A Trainee Call to Action. *Acad Med* 2020; **95**: 1831–3.
34. Cantave M, Perlson J, Lewis C, Byers B. COVID-19 Reveals Why We Need Physician Advocates Now. *Acad Med* 2020; **95**: 1125.
35. Woitowich NC, Jain S, Arora VM, Joffe H. COVID-19 Threatens Progress Toward Gender Equity Within Academic Medicine. *Acad Med* 2021; **96**: 813–6.
36. Colenda CC, Applegate WB, Reifler BV, Blazer DGI. COVID-19: Financial Stress Test for Academic Medical Centers. *Acad Med* 2020; **95**: 1143–5.
37. Sklar DP. COVID-19: Lessons From the Disaster That Can Improve Health Professions Education. *Acad Med* 2020; **95**: 1631–3.
38. English M, Vanstrum E. COVID-19’s Impact on Residency Applicants. *Acad Med* 2021; **96**: e26.
39. Ross DA, Committee for the NNCI “Quarantine C. Creating a “Quarantine Curriculum” to Enhance Teaching and Learning During the COVID-19 Pandemic. *Acad Med* 2020; **95**: 1125–6.
40. Hart A, Romney D, Sarin R, *et al.* Developing Telemedicine Curriculum Competencies for Graduate Medical Education: Outcomes of a Modified Delphi Process. *Acad Med* 2022; **97**: 577–85.
41. Foohey S, Nagji A, Yilmaz Y, Sibbald M, Monteiro S, Chan TM. Developing the Virtual Resus Room: Fidelity, Usability, Acceptability, and Applicability of a Virtual Simulation for Teaching and Learning. *Acad Med* 2022. DOI:[10.1097/ACM.0000000000004364](https://doi.org/10.1097/ACM.0000000000004364).
42. Holmberg MH, dela Cruz E, Longino A, Longino N, Çoruh B, Merel SE. Development of a Single-Institution Virtual Internal Medicine Subinternship With Near-Peer Teaching in Response to the COVID-19 Pandemic. *Acad Med* 2021; **96**: 1706–10.
43. Sam AH, Millar KR, Lupton MGF. Digital Clinical Placement for Medical Students in Response to COVID-19. *Acad Med* 2020; **95**: 1126.
44. Guragai M. “Digital Clinical Placements”: Challenges in a Lower Middle-Income Country. *Acad Med* 2021; **96**: e1.
45. Petriceks AH. Distance, Proximity, and Student Mental Health in the COVID-19 Era. *Acad Med* 2021; **96**: 743.
46. Nah SA, Singaravel S, Sanmugam A. Do-It-Yourself Surgical Simulation Kits: One Academic Medical Center’s Response to the COVID-19 Pandemic in Malaysia. *Acad Med* 2021; **96**: e3.
47. Kutscher E. Embracing Vulnerability. *Acad Med* 2021; **96**: 1345.
48. Dow AW, DiPiro JT, Giddens J, Buckley P, Santen SA. Emerging From the COVID-19 Crisis With a Stronger Health Care Workforce. *Acad Med* 2020; **95**: 1823–6.
49. Berwick K-L, Christie C. Encourage Medical Students to Experience Health Care From the Perspectives of Other Health Care Professions. *Acad Med* 2021; **96**: e8.
50. Besche H, Schwartz AW, Cockrill B. Ensuring Equitable Access to Remote Learning During the COVID-19 Pandemic. *Acad Med* 2021; **96**: e19.
51. Clark VR. Erasing the False Equivalency: Pandemics, Public Health, and Physician Education. *Acad Med* 2020; **95**: e11.
52. Farrell CM, Hayward BJ. Ethical Dilemmas, Moral Distress, and the Risk of Moral Injury: Experiences of Residents and Fellows During the COVID-19 Pandemic in the United States. *Acad Med* 2022; **97**: S55.

53. Hughes MT, Rushton CH. Ethics and Well-Being: The Health Professions and the COVID-19 Pandemic. *Acad Med* 2022; **97**: S98.
54. Fassiotto M, Valentine H, Shanafelt T, Maldonado Y. Everyday Heroism: Maintaining Organizational Cultures of Wellness and Inclusive Excellence Amid Simultaneous Pandemics. *Acad Med* 2021; **96**: 1389–92.
55. O’Keefe R, Auffermann K. Exploring the Effect of COVID-19 on Graduate Nursing Education. *Acad Med* 2022; **97**: S61.
56. Callahan KP, Salazar EG. Finding Light in the Uncertain. *Acad Med* 2021; **96**: 1281.
57. Rakowsky S, Flashner BM, Doolin J, *et al.* Five Questions for Residency Leadership in the Time of COVID-19: Reflections of Chief Medical Residents From an Internal Medicine Program. *Acad Med* 2020; **95**: 1152–4.
58. Kuy S, Tsai R, Bhatt J, *et al.* Focusing on Vulnerable Populations During COVID-19. *Acad Med* 2020; **95**: e2.
59. Lewiss RE, Jagsi R. Gender Bias: Another Rising Curve to Flatten? *Acad Med* 2021; **96**: 792–4.
60. Pichan CM. GET Access: A Student-led Initiative to Increase Geriatric Patients’ Utilization of Video Telehealth Technology During the COVID-19 Pandemic. *Acad Med* 2022. DOI:[10.1097/ACM.0000000000004465](https://doi.org/10.1097/ACM.0000000000004465).
61. Rabin TL, Mayanja-Kizza H, Barry M. Global Health Education in the Time of COVID-19: An Opportunity to Restructure Relationships and Address Supremacy. *Acad Med* 2021; **96**: 795–7.
62. Rydel TA, Bajra R, Schillinger E. Hands Off Yet All In: A Virtual Clerkship Pilot in the Ambulatory Setting During the COVID-19 Pandemic. *Acad Med* 2021; **96**: 1702–5.
63. Irani S, Bidwell SS, Solano QP. High School Medical Pipeline Programs: Challenges and New Opportunities in the Virtual Environment. *Acad Med* 2022. DOI:[10.1097/ACM.0000000000004473](https://doi.org/10.1097/ACM.0000000000004473).
64. Perez M, Williams C, Vapiwala N. “Holistic Admissions” During a Pandemic: The Effects of COVID-19 on Socioeconomically Disadvantaged Medical School Applicants. *Acad Med* 2021; **96**: e3.
65. Zhou BP. Honoring the Hippocratic Oath: Medical Student Perspective Amidst the COVID-19 Pandemic. *Acad Med* 2020; **95**: 1293.
66. Dzau VJ, Ellaissi WF, Krishnan KRR, Balatbat CA. How Academic Health Systems Can Be Ready for the Next Pandemic. *Acad Med* 2022; **97**: 479–83.
67. Godley BF, Lawley TJ, Rubenstein A, Pizzo PA. How Academic Medical Centers Can Navigate the Pandemic and Its Aftermath: Solutions for 3 Major Issues. *Acad Med* 2021; **96**: 1529–33.
68. Love S. How to Support Residents During the COVID-19 Pandemic. *Acad Med* 2020; **95**: e3.
69. Pang S, Warraich HJ. Humanizing the Morbidity and Mortality Conference. *Acad Med* 2021; **96**: 668–70.
70. Elkin B. I Could Hear the Tears. *Acad Med* 2021; **96**: 978.
71. Walters M, Alonge T, Zeller M. Impact of COVID-19 on Medical Education: Perspectives From Students. *Acad Med* 2022; **97**: S40.
72. Head ML, Acosta S, Bickford EG, Leatherland MA. Impact of COVID-19 on Undergraduate Nursing Education: Student Perspectives. *Acad Med* 2022; **97**: S49.
73. Triemstra JD, Haas MRC, Bhavsar-Burke I, *et al.* Impact of the COVID-19 Pandemic on the Clinical Learning Environment: Addressing Identified Gaps and Seizing Opportunities. *Acad Med* 2021; **96**: 1276–81.
74. Leaver CA, Stanley JM, Goodwin Veenema T. Impact of the COVID-19 Pandemic on the Future of Nursing Education. *Acad Med* 2022; **97**: S82.
75. Zhou B, Calkins C, Jayaraman T, *et al.* Implementing Value-Added Medical Education: Lessons Learned From the Student-Initiated Stanford Frontline COVID-19 Consult Service. *Acad Med* 2021; **96**: 1690–5.
76. Sam AH, Millar KR, Lupton MGF. In Reply to Guragai. *Acad Med* 2021; **96**: e1.
77. Thakur A, Soklaridis S, Sockalingam S. In Reply to Pan *et al.* *Acad Med* 2021; **96**: e14.
78. Flotte TR, Larkin AC, Fischer MA, *et al.* In Reply to Ramotshwana *et al.* *Acad Med* 2021; **96**: e15.
79. Woolliscroft JO. Innovation in Response to the COVID-19 Pandemic Crisis. *Acad Med* 2020; **95**: 1140–2.
80. Cook TC, Camp-Spivey LJ. Innovative Teaching Strategies Using Simulation for Pediatric Nursing Clinical Education During the Pandemic: A Case Study. *Acad Med* 2022; **97**: S23.
81. Chao TN, Frost AS, Newman JG. Interactive Virtual Surgical Education During COVID-19 and Beyond. *Acad Med* 2020; **95**: e9.
82. Wu A, Leask B, Noel G, de Wit H. It Is Time for the Internationalization of Medical Education to Be at Home and Accessible for All. *Acad Med* 2021; **96**: e22.

83. Ragazzoni L, Barco A, Echeverri L, *et al.* Just-in-Time Training in a Tertiary Referral Hospital During the COVID-19 Pandemic in Italy. *Acad Med* 2021; **96**: 336–9.
84. Garden E, Loebel E, Sanky C, Chudow J, Fallar R, Parkas V. Key Insights From the Development and Implementation of a Novel Virtual Interview Process for Medical School Admissions During the COVID-19 Pandemic. *Acad Med* 2021; **96**: 1156–9.
85. Kochis M, Goessling W. Learning During and From a Crisis: The Student-Led Development of a COVID-19 Curriculum. *Acad Med* 2021; **96**: 399–401.
86. Jain S, Carlos WGI. Learning in the Time of COVID-19: Key Lessons From the Pandemic for Medical Trainees. *Acad Med* 2021; **96**: 1660–2.
87. Juneja P. Learning the Lesson of Inaction. *Acad Med* 2021; **96**: 1290.
88. Kutzer KM. Learning to Show Patients You Are Listening From 3,000 Miles Away. *Acad Med* 2021; **96**: 1424.
89. Castro MRH, Calthorpe LM, Fogh SE, *et al.* Lessons From Learners: Adapting Medical Student Education During and Post COVID-19. *Acad Med* 2021; **96**: 1671–9.
90. Gruber A, Ghiringhelli M, Edri O, *et al.* Literature Review and Knowledge Distribution During an Outbreak: A Methodology for Managing Infodemics. *Acad Med* 2021; **96**: 1005–9.
91. Rotenstein LS, Huckman RS, Cassel CK. Making Doctors Effective Managers and Leaders: A Matter of Health and Well-Being. *Acad Med* 2021; **96**: 652–4.
92. Ammar A, Stock AD, Holland R, Gelfand Y, Altschul D. Managing a Specialty Service During the COVID-19 Crisis: Lessons From a New York City Health System. *Acad Med* 2020; **95**: 1495–8.
93. Stiles DF, Ruotolo BL, Kim H, Cho J, Appelbaum PS, Green NS. Managing Human Subjects Research During a Global Pandemic at an Academic Center: Lessons Learned From COVID-19. *Acad Med* 2022; **97**: 48–52.
94. Vande Vusse LK, Ryder HF, Best JA. Maximizing Career Advancement During the COVID-19 Pandemic: Recommendations for Postgraduate Training Programs. *Acad Med* 2021; **96**: 967–73.
95. Michalec B. MCAT Testing During the COVID-19 Pandemic. *Acad Med* 2020; **95**: 1292–3.
96. Li HO-Y, Bailey AMJ. Medical Education Amid the COVID-19 Pandemic: New Perspectives for the Future. *Acad Med* 2020; **95**: e11.
97. Sigdel S, Ozaki A, Dhakal R, Pradhan B, Tanimoto T. Medical Education in Nepal: Impact and Challenges of the COVID-19 Pandemic. *Acad Med* 2021; **96**: 340–2.
98. Stanton B. Medical Education in the Age of COVID-19. *Acad Med* 2021; **96**: e21.
99. Milligan M, Saraf A, Perni S. Medical Misinformation: Trainees on the Starting Line of Truth. *Acad Med* 2022. DOI:[10.1097/ACM.0000000000004378](https://doi.org/10.1097/ACM.0000000000004378).
100. Ballejos MP, Sapien R. Medical School Admissions and Enhancing Holistic Review Practices During COVID-19. *Acad Med* 2020; **95**: e5.
101. Samarasekera DD, Goh DLM, Lau TC. Medical School Approach to Manage the Current COVID-19 Crisis. *Acad Med* 2020; **95**: 1126–7.
102. Jacobson D. Medical School Inaugural Class Faces Additional Challenges Due to COVID-19 Distancing Restrictions. *Acad Med* 2021; **96**: e23.
103. Whiteman E, Dawo S. Medical Student Government Breaks COVID-19 Communication Barrier Between U.K. Students and Administrators. *Acad Med* 2021; **96**: e25.
104. Soled D, Goel S, Barry D, *et al.* Medical Student Mobilization During a Crisis: Lessons From a COVID-19 Medical Student Response Team. *Acad Med* 2020; **95**: 1384–7.
105. Menon A, Klein EJ, Kollars K, Kleinhenz ALW. Medical Students Are Not Essential Workers: Examining Institutional Responsibility During the COVID-19 Pandemic. *Acad Med* 2020; **95**: 1149–51.
106. Alshak MN, Li HA, Wehmeyer GT. Medical Students as Essential Frontline Researchers During the COVID-19 Pandemic. *Acad Med* 2021; **96**: 964–6.
107. Salahou A, Rahmon D, Fedorowicz M. Medical Students Confront Racism and Systemic Oppression Amidst a Global Pandemic. *Acad Med* 2021; **96**: e18.
108. Boscamp JR, Duffy CP, Barsky C, Stanton BF. Medical Students on the Virtual Front Line: A Literature Review Elective to Provide COVID-19 Clinical Teams With Essential Information. *Acad Med* 2021; **96**: 1002–4.
109. Ramotshwana B, Gupta A, Seth S, Shah H. New Physicians, New Challenges: The Impact of Accelerated Graduation and Deployment Due to COVID-19. *Acad Med* 2021; **96**: e15.
110. Machado DSD, Beatriz M. On the Frontlines, Behind the Computer Screen. *Acad Med* 2020; **95**: e10.



111. Kim CS, Lynch JB, Cohen S, *et al.* One Academic Health System's Early (and Ongoing) Experience Responding to COVID-19: Recommendations From the Initial Epicenter of the Pandemic in the United States. *Acad Med* 2020; **95**: 1146–8.
112. Gulamhussein AHM, Ischebeck A. Our Essential Status: Perspective From Across the Pond. *Acad Med* 2021; **96**: e20.
113. O'Brien JE, Thrall CA, Sebbens D. Overcoming COVID-19 Challenges: Using Remote and Hybrid Simulation Designs in DNP Programs. *Acad Med* 2022; **97**: S66.
114. Jansen CS. Pandemic Pause: Lessons in Unscrambling My Daily Life. *Acad Med* 2020; **95**: 1899.
115. Clark A, Wagner R, Brubaker M, Acquavita S, Wilder C. Pandemic-Related Disruptions in Nursing Education: Zooming Out for an Innovative Interprofessional Simulation. *Acad Med* 2022; **97**: S110.
116. Liang ZC, Ooi SBS, Wang W. Pandemics and Their Impact on Medical Training: Lessons From Singapore. *Acad Med* 2020; **95**: 1359–61.
117. O'Brien BC, Teherani A, Boscardin CK, O'Sullivan PS. Pause, Persist, Pivot: Key Decisions Health Professions Education Researchers Must Make About Conducting Studies During Extreme Events. *Acad Med* 2020; **95**: 1634–8.
118. Wade C. Physician–Scientists in the Era of COVID-19: Gone but Not Forgotten. *Acad Med* 2021; **96**: e5.
119. Brayer SW, Warren PW. Pledge 43 for the 43%: Pediatric Residents Respond to Community Needs During the COVID-19 Pandemic. *Acad Med* 2022. DOI:10.1097/ACM.0000000000004442.
120. Frankl SE, Joshi A, Onorato S, *et al.* Preparing Future Doctors for Telemedicine: An Asynchronous Curriculum for Medical Students Implemented During the COVID-19 Pandemic. *Acad Med* 2021; **96**: 1696–701.
121. Moutier CY, Myers MF, Feist JB, Feist JC, Zisook S. Preventing Clinician Suicide: A Call to Action During the COVID-19 Pandemic and Beyond. *Acad Med* 2021; **96**: 624–8.
122. Gabrielson AT, Kohn JR, Sparks HT, Clifton MM, Kohn TP. Proposed Changes to the 2021 Residency Application Process in the Wake of COVID-19. *Acad Med* 2020; **95**: 1346–9.
123. Kaplan CA, Chan CC, Feingold JH, *et al.* Psychological Consequences Among Residents and Fellows During the COVID-19 Pandemic in New York City: Implications for Targeted Interventions. *Acad Med* 2021; **96**: 1722–31.
124. Maeshiro R, Carney JK. Public Health Is Essential: COVID-19's Learnable Moment for Medical Education. *Acad Med* 2020; **95**: 1799–801.
125. Peterson WJ, Munzer BW, Tucker RV, *et al.* Rapid Dissemination of a COVID-19 Airway Management Simulation Using a Train-the-Trainers Curriculum. *Acad Med* 2021; **96**: 1414–8.
126. Lane ECA, Tran AA, Grauly CJ, Bumsted T. Rapid Mobilization of Medical Students to Provide Health Care Workers With Emergency Childcare During the COVID-19 Pandemic. *Acad Med* 2021; **96**: 1302–5.
127. Carroll Turpin MA, Steele K, Matuk-Villazon O, Rowland K, Dayton CB, Horn KV. Rapid Transition to a Virtual Multiple Mini-Interview Admissions Process: A New Medical School's Experience During the COVID-19 Pandemic. *Acad Med* 2021; **96**: 1152–5.
128. Galvin S, Neubauer LC, Leonard WR, Doobay-Persaud A. Reassessing Global Health Education in the Age of COVID-19. *Acad Med* 2021; **96**: e20.
129. Oyeleye OA. Remote Learning for Medical Students in Nigeria During a Pandemic. *Acad Med* 2021; **96**: e2.
130. Weiss C, Traczuk A, Motley R. Reopening a Student-Run Free Clinic During the COVID-19 Pandemic to Provide Care for People Experiencing Homelessness. *Acad Med* 2022. DOI:10.1097/ACM.0000000000004480.
131. Manson DK, Shen S, Lavelle MP, *et al.* Reorganizing a Medicine Residency Program in Response to the COVID-19 Pandemic in New York. *Acad Med* 2020; **95**: 1670–3.
132. Ward HB. Resident Leadership in the Era of COVID-19: Harnessing Emotional Intelligence. *Acad Med* 2020; **95**: 1521–3.
133. Schwartz DA, Connerney MA, Davila-Molina M, Tummalapalli SL. Resident Mental Health at the Epicenter of the COVID-19 Pandemic. *Acad Med* 2021; **96**: e16.
134. Rojek AE, Schiller PT. Residents as Innovators on COVID-19 Respiratory Isolation Units. *Acad Med* 2022. DOI:10.1097/ACM.0000000000004423.
135. Sindhu KK. Schrödinger's Resident: Redeployment in the Age of COVID-19. *Acad Med* 2020; **95**: 1353.
136. Sata SS, Vekstein B, Svetkey L, Criscione-Schreiber L, Cooney KA. "Sheroes": Celebrating Women in Medicine Month During the Time of COVID-19. *Acad Med* 2021; **96**: e17.

137. Muller D, Hurtado A, Cunningham T, *et al.* Social Determinants, Risk Factors, and Needs: A New Paradigm for Medical Education. *Acad Med* 2022; **97**: S12.
138. Rosseau NA, Marwah H. Social Justice and COVID-19: A Rallying Cry for Medical Schools to Prioritize Criminal Justice Health. *Acad Med* 2021; **96**: e18.
139. Peskin-Stolze M. St. Paul Is Burning Commentary on “St. Paul Is Burning”. *Acad Med* 2022. DOI: [10.1097/ACM.0000000000004343](https://doi.org/10.1097/ACM.0000000000004343).
140. Kumagai AK, Baruch J. Stories in the Time of COVID-19. *Acad Med* 2021; **96**: 1095–6.
141. Wilby KJ, De Chun L, Ye R, Smith AJ. Students’ Experiences With Racism During the COVID-19 Pandemic. *Acad Med* 2021; **96**: e4.
142. Young JQ, Friedman KA, Thakker K, *et al.* Supervision and Care Quality as Perceived by Redeployed Attendings, Fellows, and Residents During a COVID-19 Surge: Lessons for the Future. *Acad Med* 2022; **97**: S28.
143. Yule AM, Ijadi-Maghsoodi R, Bagot KS, Bath E. Support for Early-Career Female Physician–Scientists as Part of the COVID-19 Recovery Plan. *Acad Med* 2021; **96**: e16.
144. Panwala TF, Tou LC, Siddiqui TA. Supporting Geriatric Patients During a Global Pandemic. *Acad Med* 2022. DOI: [10.1097/ACM.0000000000004416](https://doi.org/10.1097/ACM.0000000000004416).
145. Schlégl AT, Pintér Z, Kovács A, *et al.* Teaching Basic Surgical Skills Using Homemade Tools in Response to COVID-19. *Acad Med* 2020; **95**: e7.
146. McCullough LB, Coverdale J, Chervenak FA. Teaching Professional Formation in Response to the COVID-19 Pandemic. *Acad Med* 2020; **95**: 1488–91.
147. Schifeling W. Telehealth 101: An Essential Course for All Medical Students. *Acad Med* 2020; **95**: e10.
148. Muntz MD, Franco J, Ferguson CC, Ark TK, Kalet A. Telehealth and Medical Student Education in the Time of COVID-19—and Beyond. *Acad Med* 2021; **96**: 1655–9.
149. Jumreornvong O, Yang E, Race J, Appel J. Telemedicine and Medical Education in the Age of COVID-19. *Acad Med* 2020; **95**: 1838–43.
150. Cleland J. The “Uncurated Exposure” of Videoconferencing. *Acad Med* 2020; **95**: 1293–4.
151. Whelan AJ. The Change to Pass/Fail Scoring for Step 1 in the Context of COVID-19: Implications for the Transition to Residency Process. *Acad Med* 2020; **95**: 1305–7.
152. Prince ADP, Green AR, Brown DJ, *et al.* The Clarion Call of the COVID-19 Pandemic: How Medical Education Can Mitigate Racial and Ethnic Disparities. *Acad Med* 2021; **96**: 1518–23.
153. Green EW, Burnett JR. The Cost of One Residency Position: A Studio Apartment of Sea Ice. *Acad Med* 2020; **95**: e6.
154. Nakatsu L. The COVID Clerkship. *Acad Med* 2021; **96**: 1136.
155. Rosen K. The COVID-19 Curriculum. *Acad Med* 2020; **95**: 1311.
156. Hauer KE, Lockspeiser TM, Chen HC. The COVID-19 Pandemic as an Imperative to Advance Medical Student Assessment: Three Areas for Change. *Acad Med* 2021; **96**: 182–5.
157. Chytas D, Salmas M, Troupis T. The COVID-19 Pandemic Is an Opportunity to Enhance Research on Remote Digital Anatomy Teaching Platforms. *Acad Med* 2021; **96**: e25.
158. Bahethi RR, Liu BY, Asriel B, *et al.* The COVID-19 Student WorkForce at the Icahn School of Medicine at Mount Sinai: A Model for Rapid Response in Emergency Preparedness. *Acad Med* 2021; **96**: 859–63.
159. Soklaridis S. The Father-Daughter Dinner Dance: A Waltz With Ethics and COVID-19. *Acad Med* 2021; **96**: 1682.
160. Blankenburg R, Gonzalez del Rey J, Aylor M, *et al.* The Impact of the COVID-19 Pandemic on Pediatric Graduate Medical Education: Lessons Learned and Pathways Forward. *Acad Med* 2022; **97**: S35.
161. Sinha A. The Little Red Lighthouse. *Acad Med* 2021; **96**: 1680.
162. Cloutier RL, Bumsted T, Mejicano G. The MCAT Was a Barrier to Diversity Long Before COVID-19. *Acad Med* 2021; **96**: e22.
163. Hussein IM, Daud A. The Rise of Virtual Care in the Pandemic Era: Ensuring Equitable Systems for Our Most Marginalized Populations. *Acad Med* 2022. DOI: [10.1097/ACM.0000000000004464](https://doi.org/10.1097/ACM.0000000000004464).
164. Schuiteman S, Ibrahim NI, Hammoud A, Kruger L, Mangrulkar RS, Daniel M. The Role of Medical Student Government in Responding to COVID-19. *Acad Med* 2021; **96**: 62–7.
165. Jeffries PR, Bushardt RL, DuBose-Morris R, *et al.* The Role of Technology in Health Professions Education During the COVID-19 Pandemic. *Acad Med* 2022; **97**: S104.
166. Boysen-Osborn M, Youm J, Le-Bucklin K-V. The Virtual Match: A New Approach to Celebrating Students During Social Distancing Due to COVID-19. *Acad Med* 2020; **95**: e8.

167. Phung N, Liu X, Li M. The Wellness Ambassador Program: A Student-Led Initiative to Promote Wellness and Connection Among Trainees During and Beyond the COVID-19 Pandemic. *Acad Med* 2022. DOI:[10.1097/ACM.0000000000004428](https://doi.org/10.1097/ACM.0000000000004428).
168. Ayala A, Ukeje C. There Is No Place Like Home: Rethinking Away Rotations. *Acad Med* 2020; **95**: e5.
169. Termuehlen H. Thoughts of a Premedical Student on the Current State of the Medical School Application Process. *Acad Med* 2020; **95**: e1.
170. Kemp MT, Rivard SJ, Anderson S, *et al*. Trainee Wellness and Safety in the Context of COVID-19: The Experience of One Institution. *Acad Med* 2021; **96**: 655–60.
171. Tsang VWL, Yu A, Haines MJ, *et al*. Transforming Disruption Into Innovation: A Partnership Between the COVID-19 Medical Student Response Team and the University of British Columbia. *Acad Med* 2021; **96**: 1650–4.
172. Mun M. Uncertainty Is the New Norm, Adaptability Is Essential. *Acad Med* 2021; **96**: 92.
173. Bloom-Feshbach K, Bullington BW, Wahid N, McNairy ML. Using Digital Tablets to Humanize Patient Care During the COVID-19 Pandemic. *Acad Med* 2021; **96**: e9.
174. Hassan A, Suwondo PE, Roberts JA. Using Global Health Lessons to Sustain Medical Student Activism Beyond COVID-19. *Acad Med* 2022. DOI:[10.1097/ACM.0000000000004433](https://doi.org/10.1097/ACM.0000000000004433).
175. Pan J, Scott KR, Phillips AW. Using Learning Experience Design to Optimize Digital Instruction During COVID-19 and Beyond. *Acad Med* 2021; **96**: e14.
176. Tesema N, Collison M, Luo C. Using Medical Students as Champions Against Misinformation During a Global Pandemic. *Acad Med* 2022. DOI:[10.1097/ACM.0000000000004368](https://doi.org/10.1097/ACM.0000000000004368).
177. Thakur A, Soklaridis S, Crawford A, Mulsant B, Sockalingam S. Using Rapid Design Thinking to Overcome COVID-19 Challenges in Medical Education. *Acad Med* 2021; **96**: 56–61.
178. Zaki MM, Nahed BV. Utilizing Virtual Interviews in Residency Selection Beyond COVID-19. *Acad Med* 2020; **95**: e7.
179. Becker NV, Bakshi S, Martin KL, *et al*. Virtual Team Rounding: A Cross-Specialty Inpatient Care Staffing Program to Manage COVID-19 Surges. *Acad Med* 2021; **96**: 1717–21.
180. Ray JM, Wong AH, Yang TJ, *et al*. Virtual Telesimulation for Medical Students During the COVID-19 Pandemic. *Acad Med* 2021; **96**: 1431–5.
181. Behbahani S, Smith CA, Carvalho M, Warren CJ, Gregory M, Silva NA. Vulnerable Immigrant Populations in the New York Metropolitan Area and COVID-19: Lessons Learned in the Epicenter of the Crisis. *Acad Med* 2020; **95**: 1827–30.
182. Lucey CR, Davis JA, Green MM. We Have No Choice but to Transform: The Future of Medical Education After the COVID-19 Pandemic. *Acad Med* 2022; **97**: S71.
183. Sklar D, Yilmaz Y, Chan TM. What the COVID-19 Pandemic Can Teach Health Professionals About Continuing Professional Development. *Acad Med* 2021; **96**: 1379–82.
184. Robinson LJ, Engelson BJ, Hayes SN. Who Is Caring for Health Care Workers' Families Amid COVID-19? *Acad Med* 2021; **96**: 1254–8.
185. Filut A, Carnes M. Will Losing Black Physicians Be a Consequence of the COVID-19 Pandemic? *Acad Med* 2020; **95**: 1796–8.
186. Rabinowitz LG, Rabinowitz DG. Women on the Frontline: A Changed Workforce and the Fight Against COVID-19. *Acad Med* 2021; **96**: 808–12.

## Annex 6: Supplementary Figures

Figure 1: Blend of online and in-person instruction by level of learning

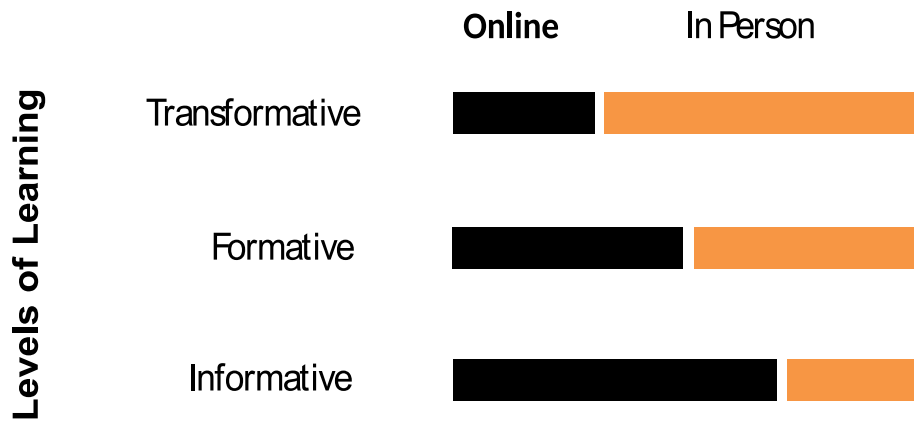

Supplement: mmc1.pdf [file mmc1.pdf]
